# Supplementary material for: One-pot synthesis of α,β-epoxy ketones through domino reaction between alkenes and aldehydes catalyzed by proline based chiral organocatalysts
Source: Royal Society of Chemistry journal article supplement (doi:10.1039/c7ob00031f), 2017-01-01
Supplement: c7ob00031f1.pdf [file c7ob00031f1.pdf]

# One-pot synthesis of $\alpha,\beta$ -epoxy ketones through domino reaction between alkenes and aldehydes catalyzed by proline based chiral organocatalysts

Veeramanoharan Ashokkumar, Ayyanar Siva\*

Supramolecular and Organometallic Chemistry Lab, School of Chemistry, Madurai Kamaraj University, Madurai-625 021, Tamil Nadu, India.

E-mail: drasiva@gmail.com

## Supporting Information

### Table of Contents

| S. No | Contents                                                                                                      | Page no. |
|-------|---------------------------------------------------------------------------------------------------------------|----------|
| 1     | Scheme S1 Synthesis of different symmetric proline based organocatalysts                                      | 2        |
| 2     | Table S1 Catalyst optimization for the domino reaction (oxidative coupling) between benzaldehyde and styrene. | 2        |
| 3     | NMR & Mass spectrum of intermediates, organocatalysts and $\alpha,\beta$ -epoxy ketone derivatives            | 3-31     |
| 4     | HPLC chromatograms of $\alpha,\beta$ -epoxy ketone derivatives                                                | 32-73    |
| 5     | References                                                                                                    | 73       |

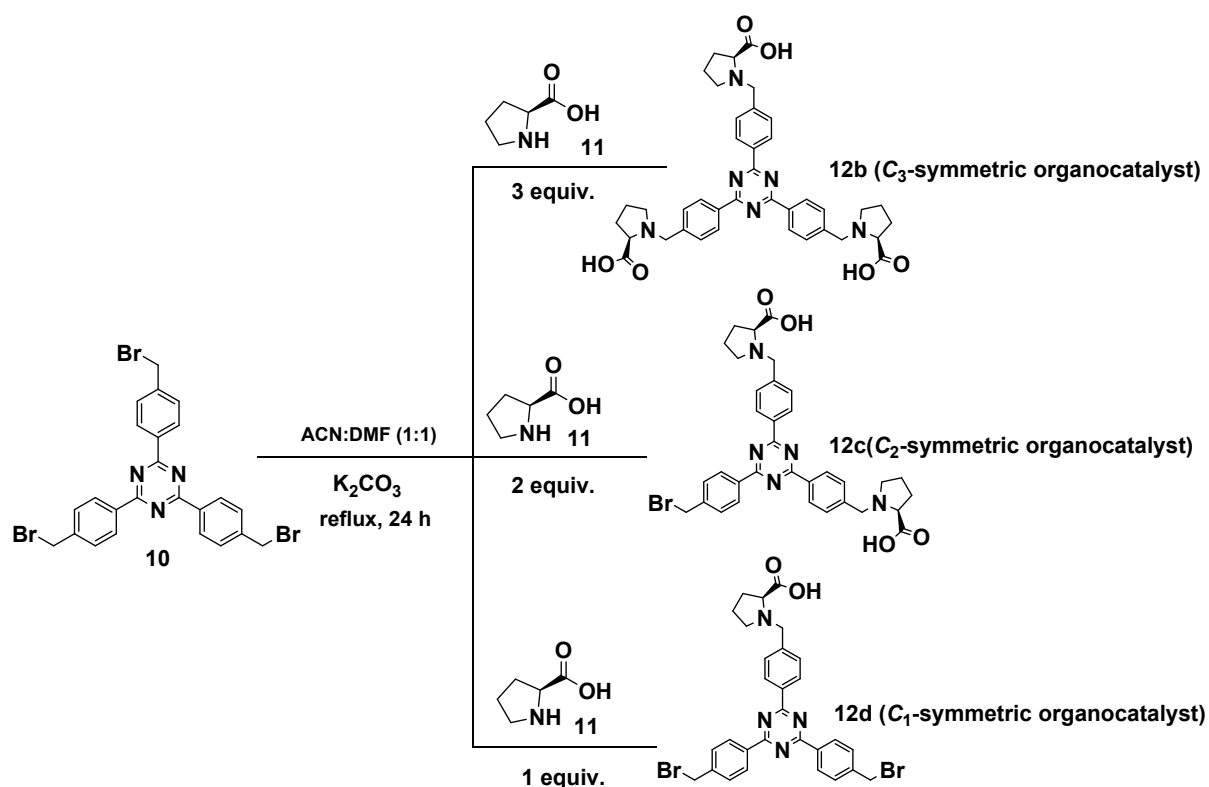

**Scheme S1** Synthesis of different symmetric proline based organocatalysts

**Table S1** Catalyst optimization for the domino reaction (oxidative coupling) between benzaldehyde and styrene.

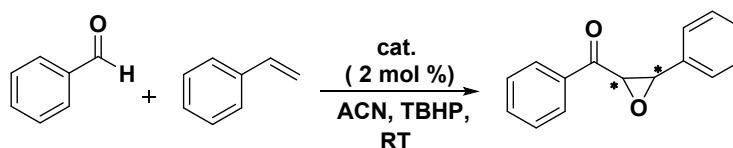

| Entry | organocatalysts | Symmetry of the organocatalysts | Time (h) <sup>a</sup> | Yield (%) <sup>b</sup> | ee (%) <sup>c</sup> |
|-------|-----------------|---------------------------------|-----------------------|------------------------|---------------------|
| 1     | <b>12a</b>      | ( $C_3$ -symmetry)              | 10                    | 90                     | 95                  |
| 2     | <b>12b</b>      | ( $C_3$ -symmetry)              | 10                    | 95                     | 99                  |
| 3     | <b>12c</b>      | ( $C_2$ -symmetry)              | 24                    | 70                     | 82                  |
| 4     | <b>12d</b>      | ( $C_1$ -symmetry)              | 36                    | 57                     | 73                  |

<sup>a</sup> The domino reaction was carried out between the benzaldehyde (1 mmol), styrene (1 mmol), TBHP (2 equiv.) and acetonitrile (2 mL) with different symmetric catalysts at room temperature with different time. <sup>b</sup> Isolated yield of purified material. <sup>c</sup> Enantiopurity was determined by HPLC analysis of epoxide product using a chiral column (Chiralcel OD-H) with hexane: IPA as an eluent. <sup>d</sup> Absolute configuration (2*R*,3*S*) was determined by comparison of the HPLC retention time using known literature data.<sup>1-7</sup>

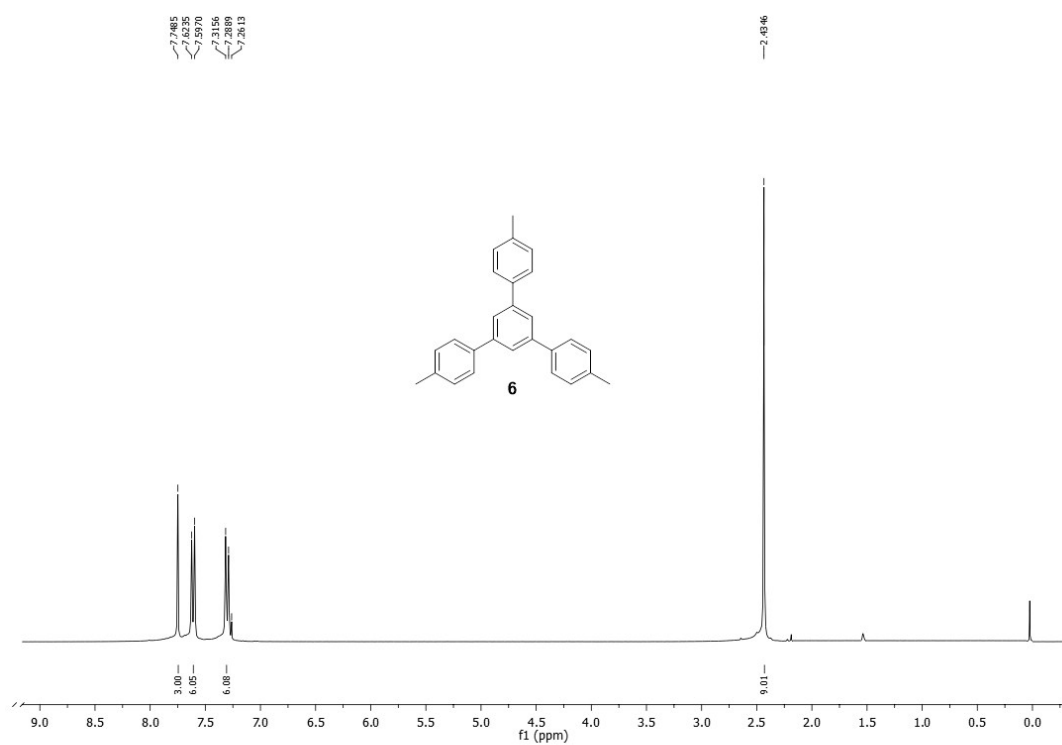

**Figure S1:** <sup>1</sup>H NMR Spectrum of compound **6**.

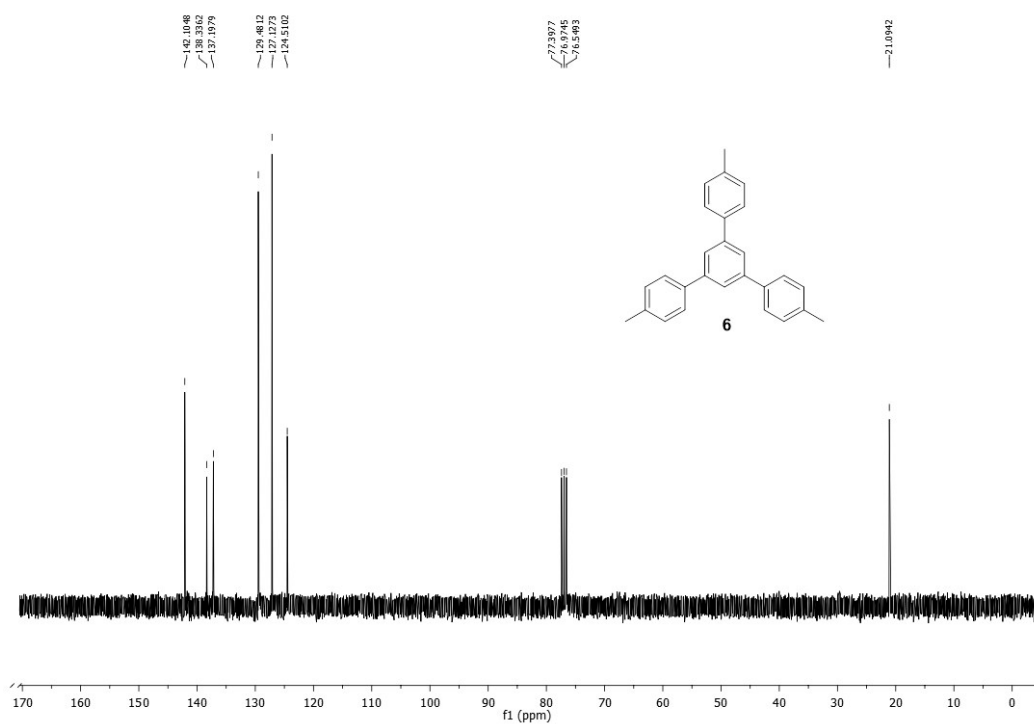

**Figure S2:** <sup>13</sup>C NMR Spectrum of compound **6**.

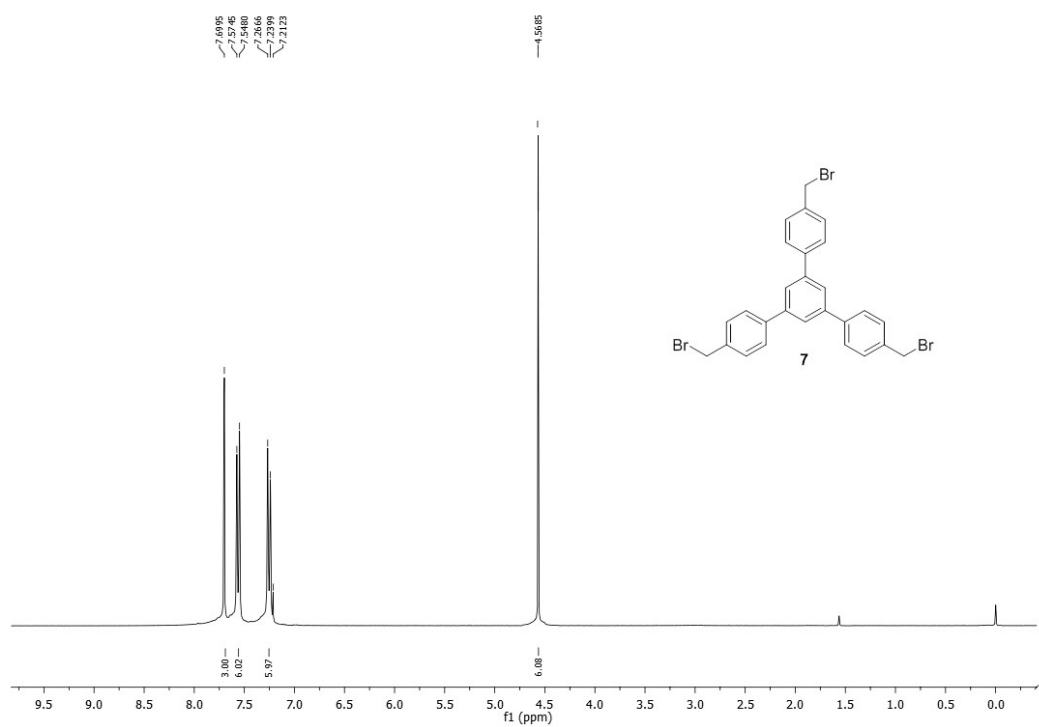

**Figure S3:** <sup>1</sup>H NMR Spectrum of scaffold 7.

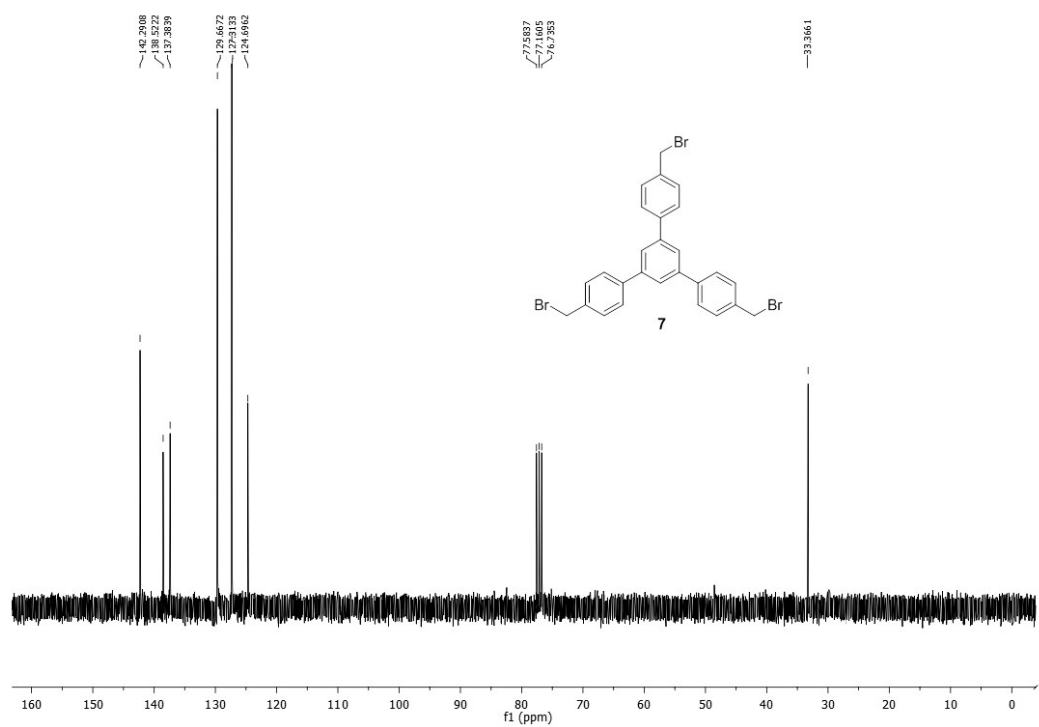

**Figure S4:** <sup>13</sup>C NMR Spectrum of scaffold 7.

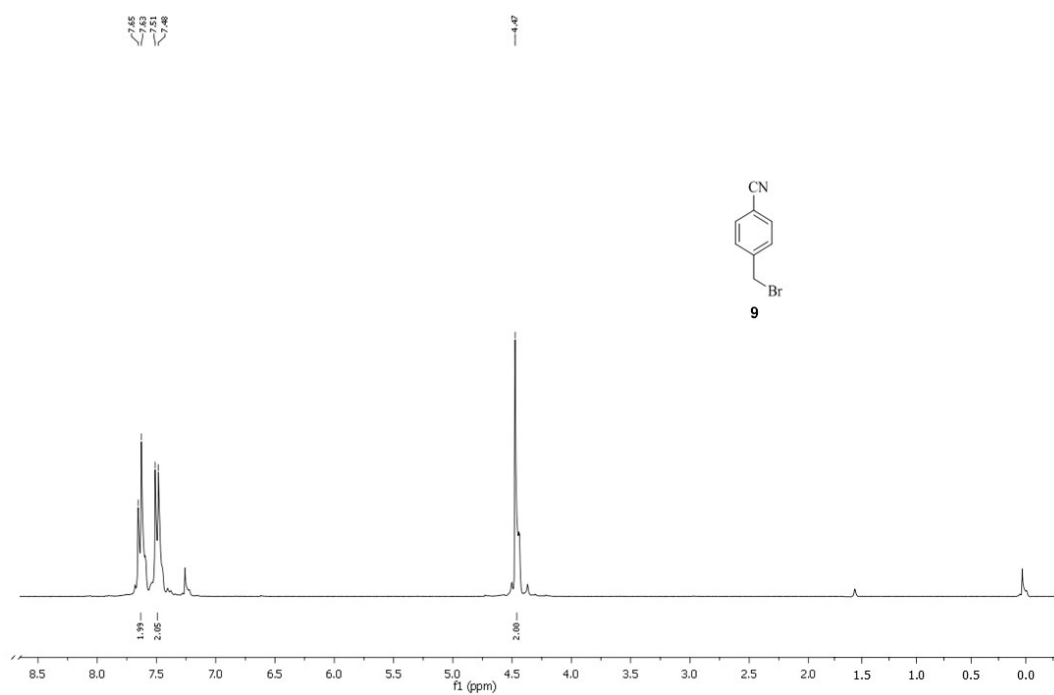

**Figure S5:** <sup>1</sup>H NMR Spectrum of scaffold **9**.

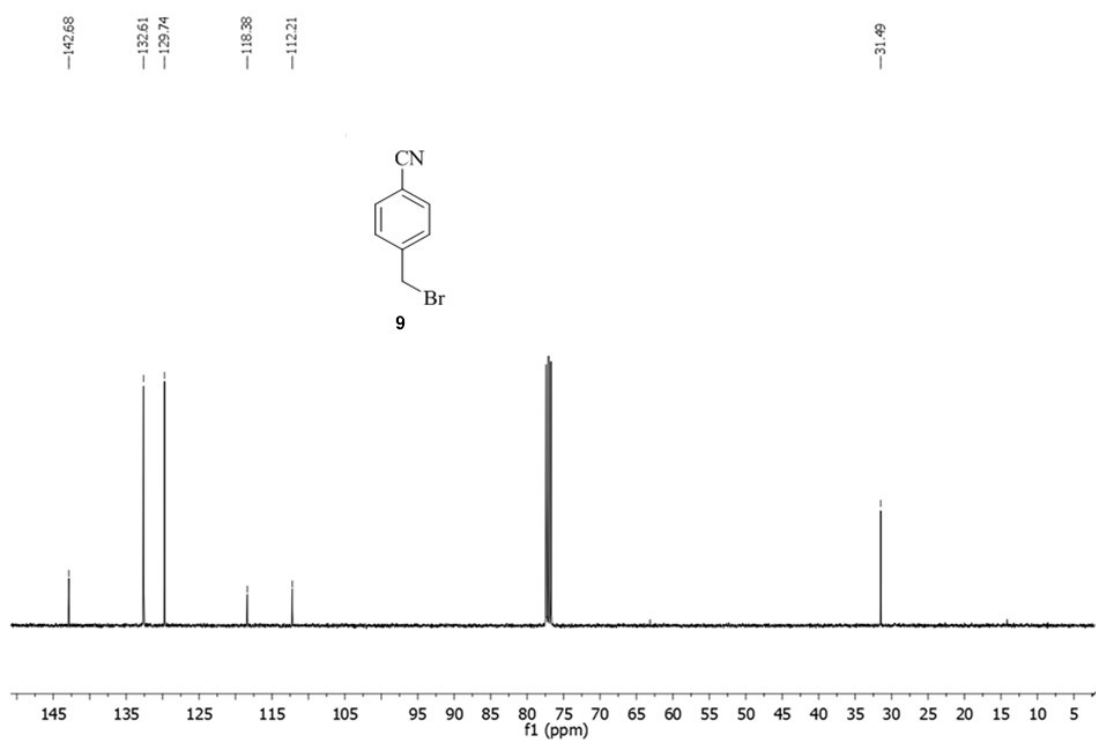

**Figure S6:** <sup>13</sup>C NMR Spectrum of compound **9**.

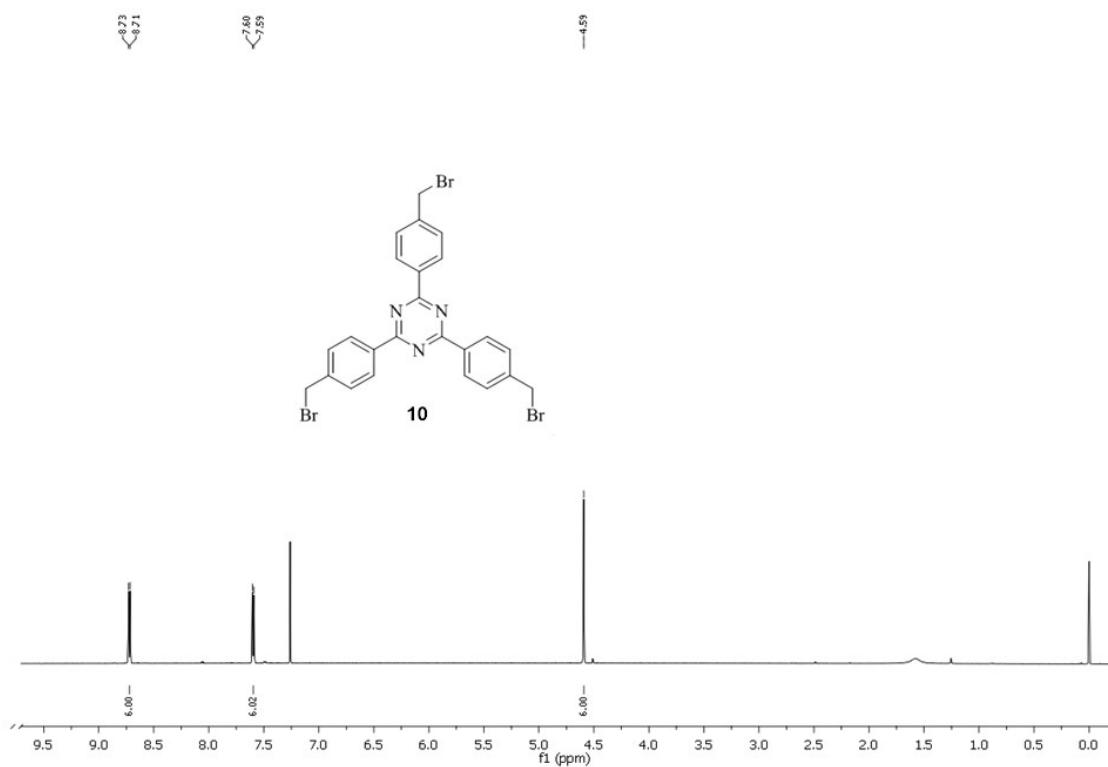

**Figure S7:**  $^1\text{H}$  NMR Spectrum of scaffold **10**.

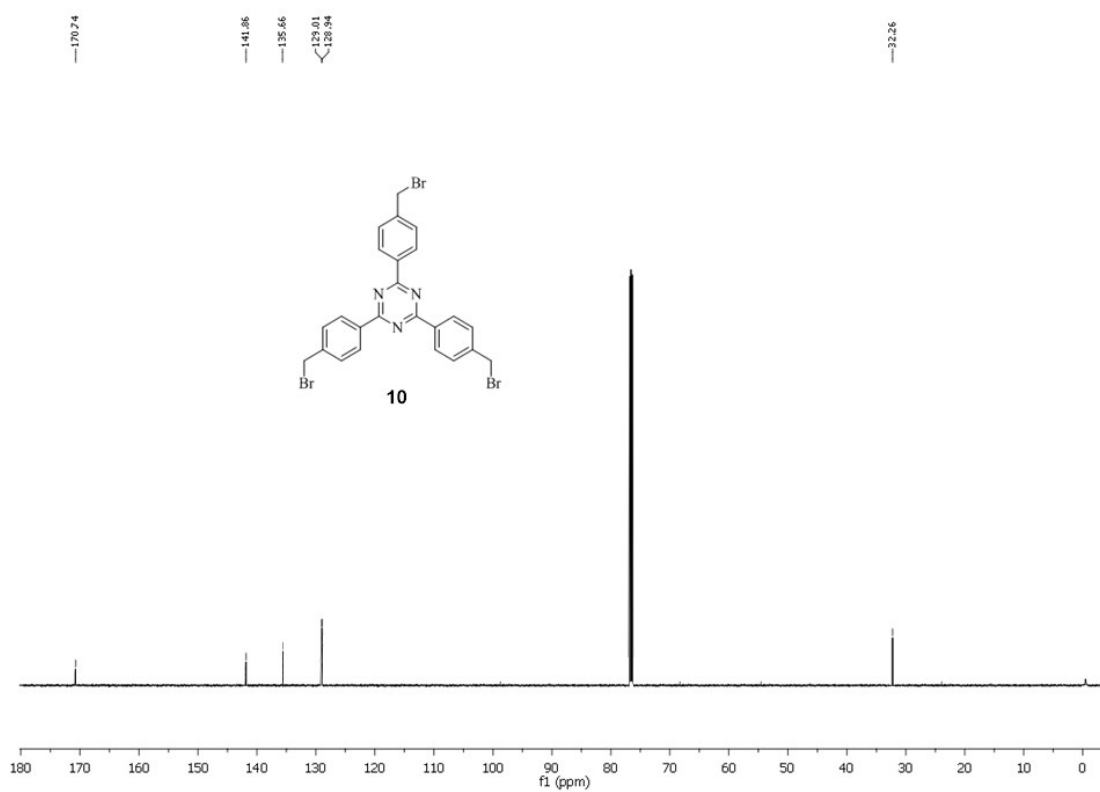

**Figure S8:**  $^{13}\text{C}$  NMR Spectrum of scaffold **10**.

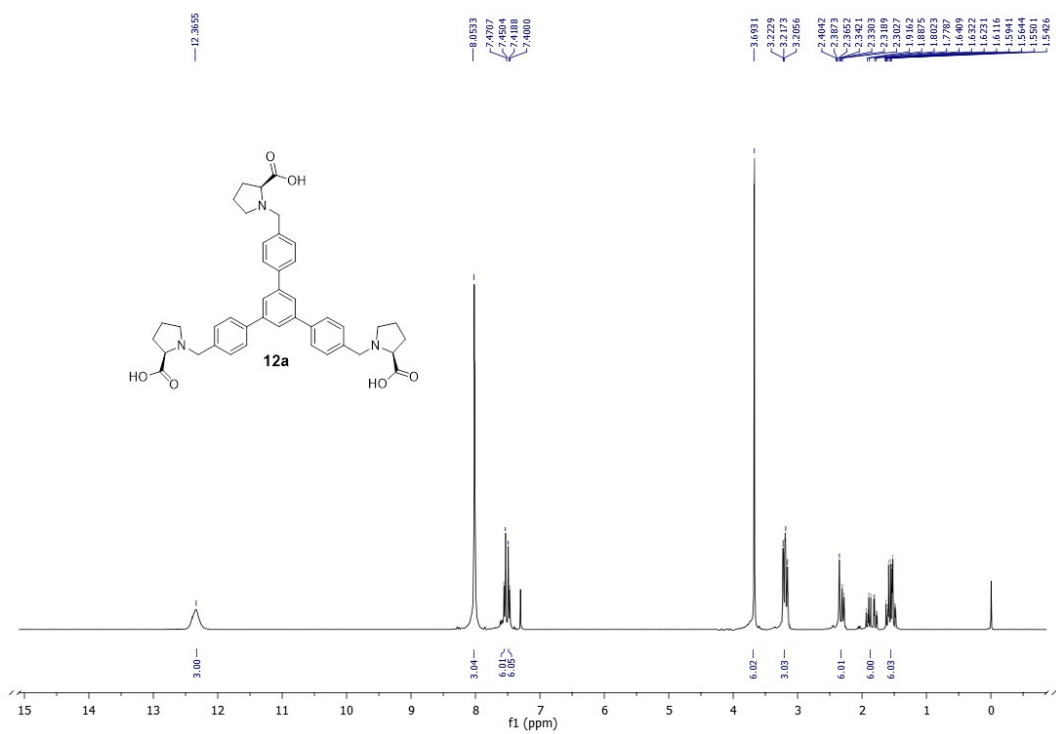

**Figure S9:** <sup>1</sup>H NMR Spectrum of organocatalyst **12a**.

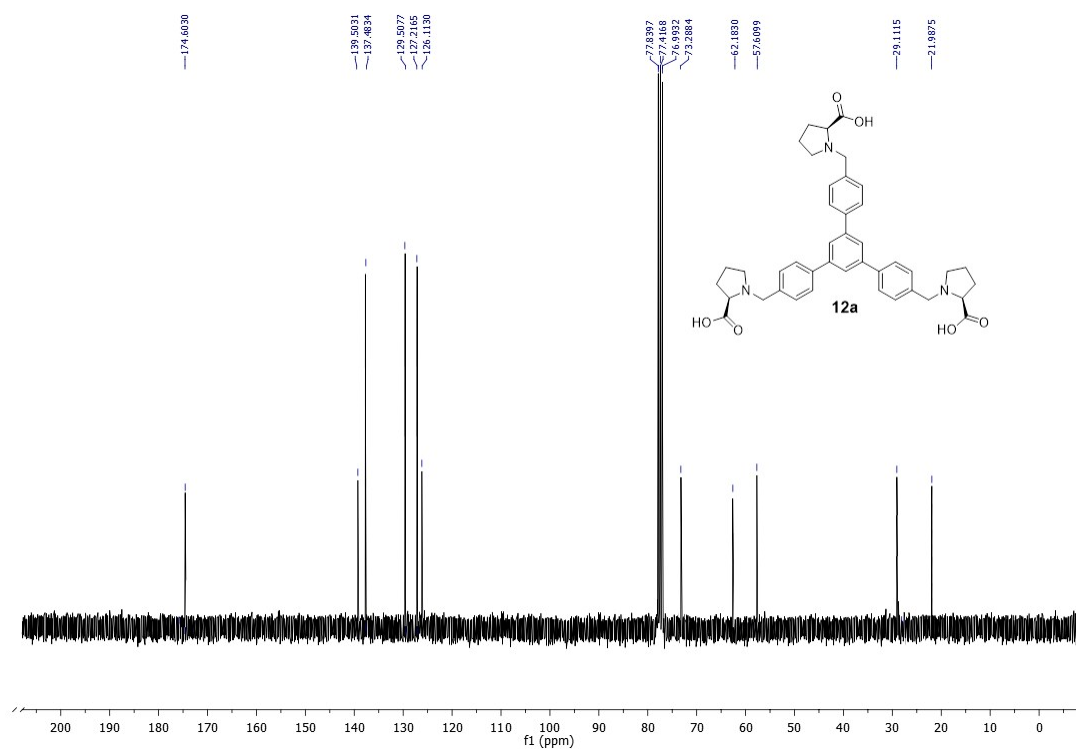

**Figure S10:** <sup>13</sup>C NMR Spectrum of organocatalyst **12a**.

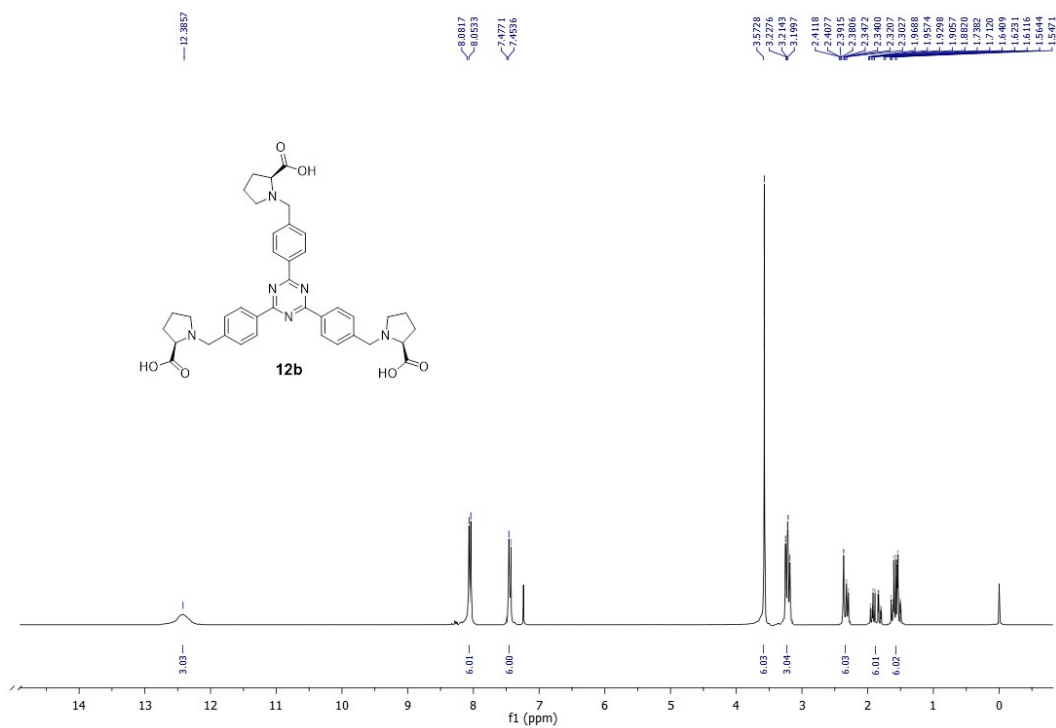

Figure S11:  $^1\text{H}$  NMR Spectrum of organocatalyst **12b**.

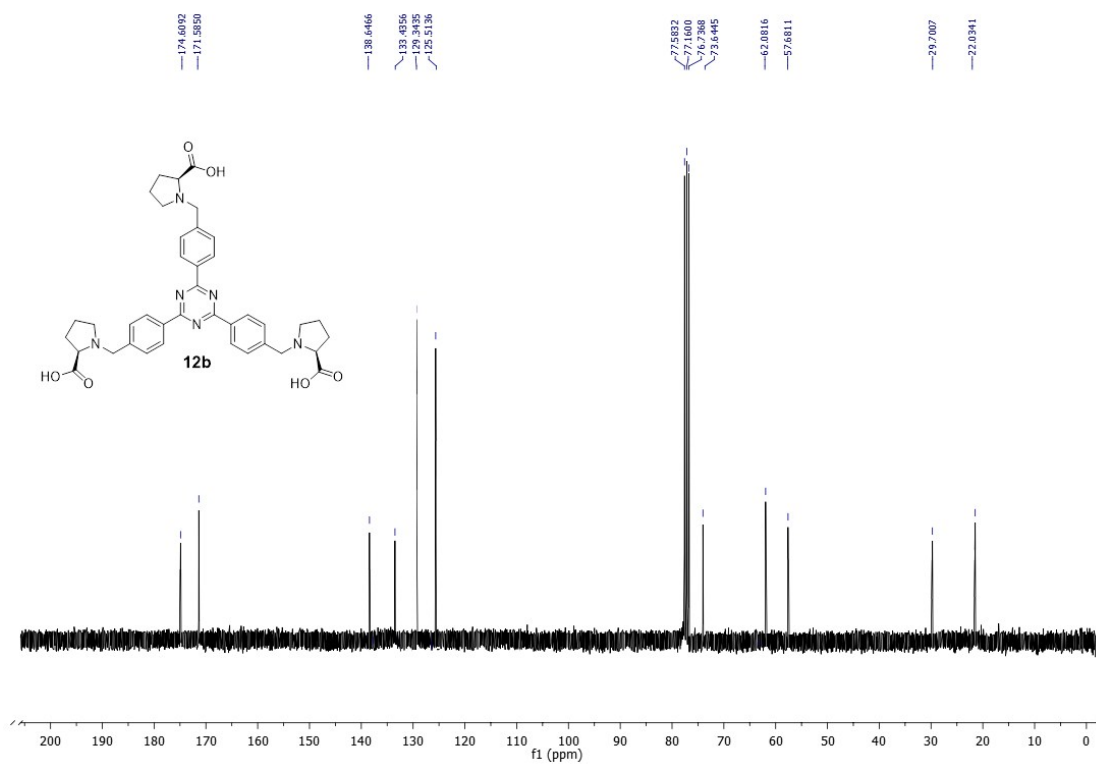

Figure S12:  $^{13}\text{C}$  NMR Spectrum of organocatalyst **12b**.

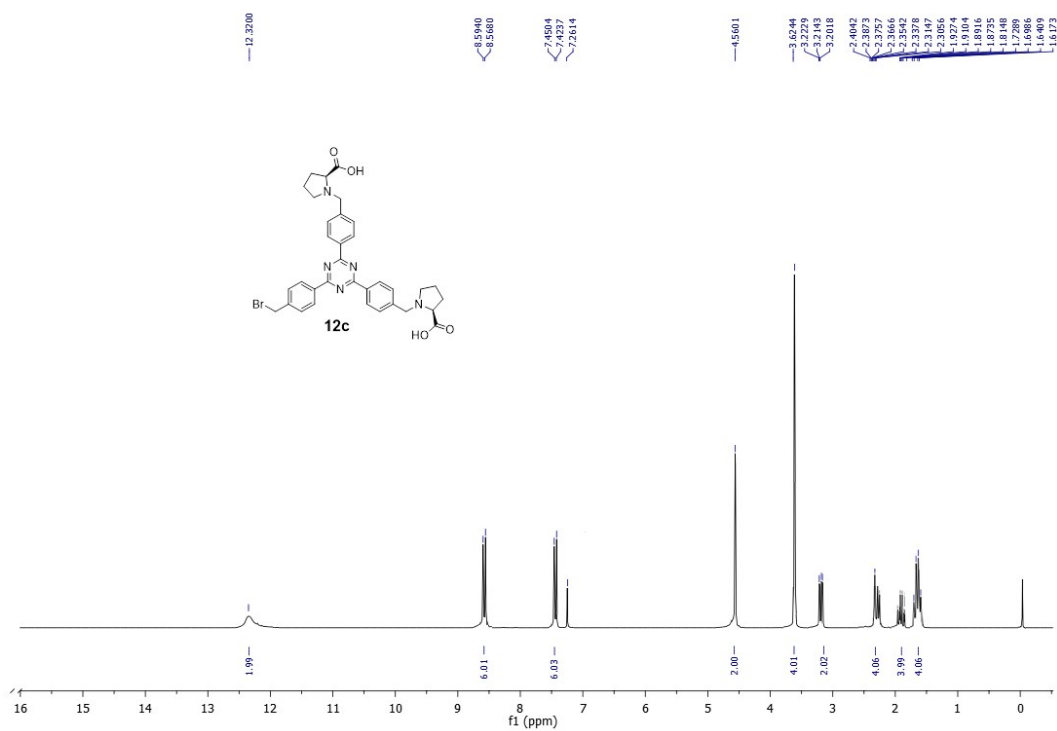

**Figure S13:** <sup>1</sup>H NMR Spectrum of *C*<sub>2</sub>-symmetric organocatalyst **12c**.

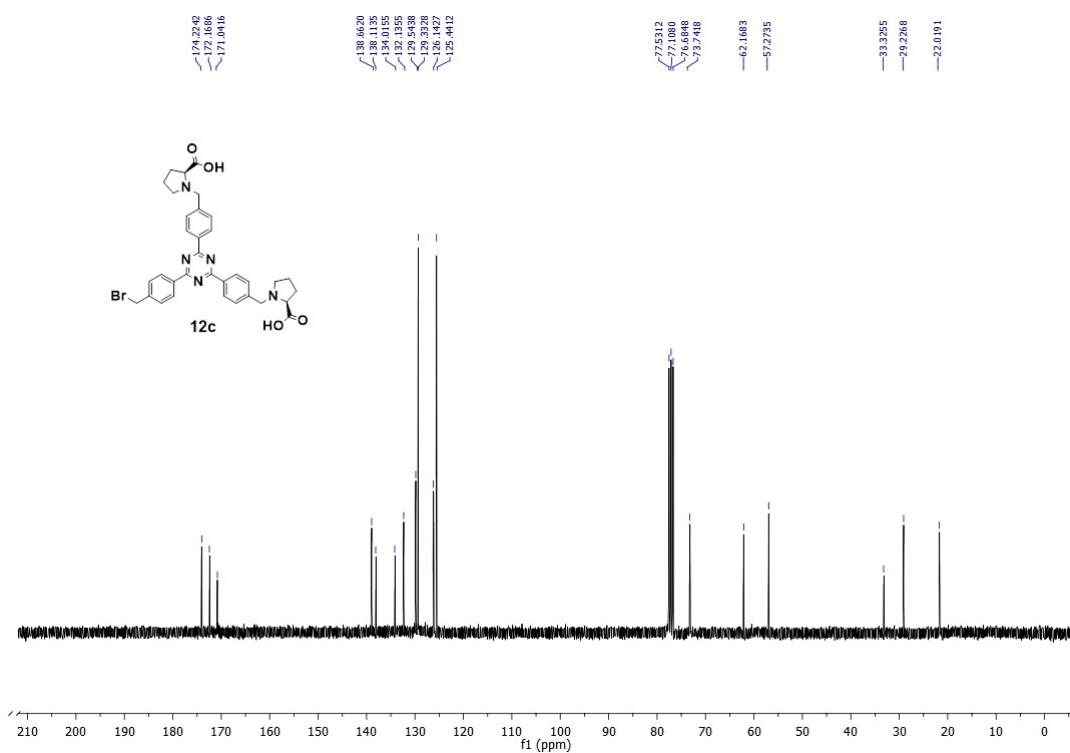

**Figure S14:** <sup>13</sup>C NMR Spectrum of *C*<sub>2</sub>-symmetric organocatalyst **12c**.

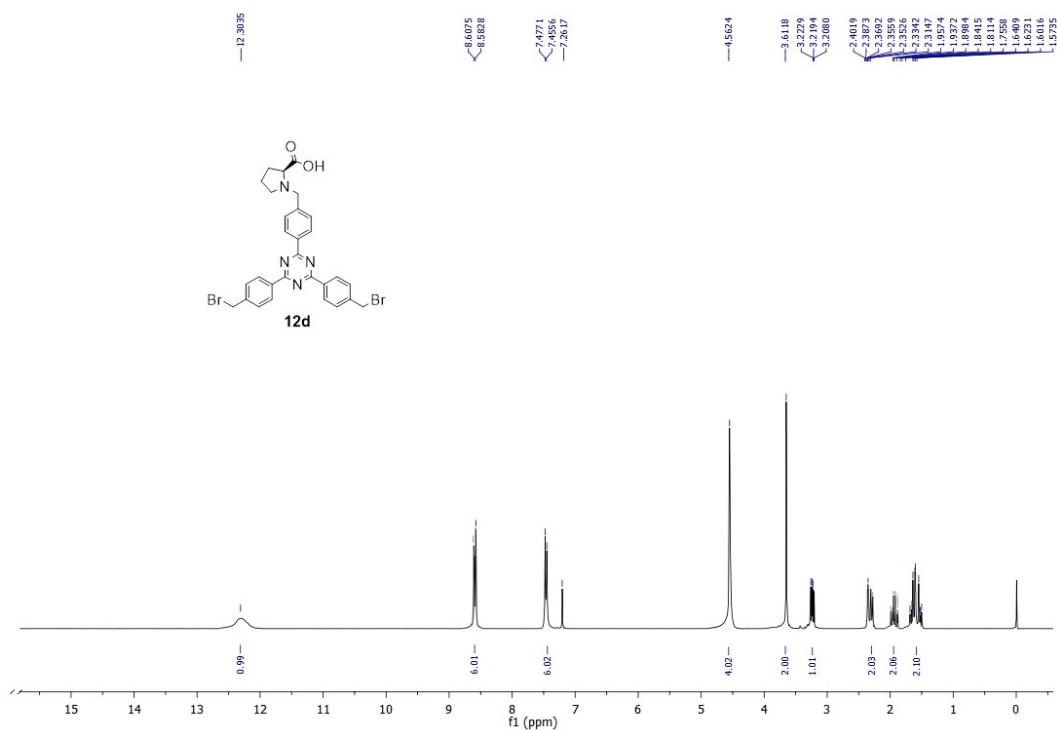

**Figure S15:** <sup>1</sup>H NMR Spectrum of C<sub>1</sub>-symmetric organocatalyst **12d**.

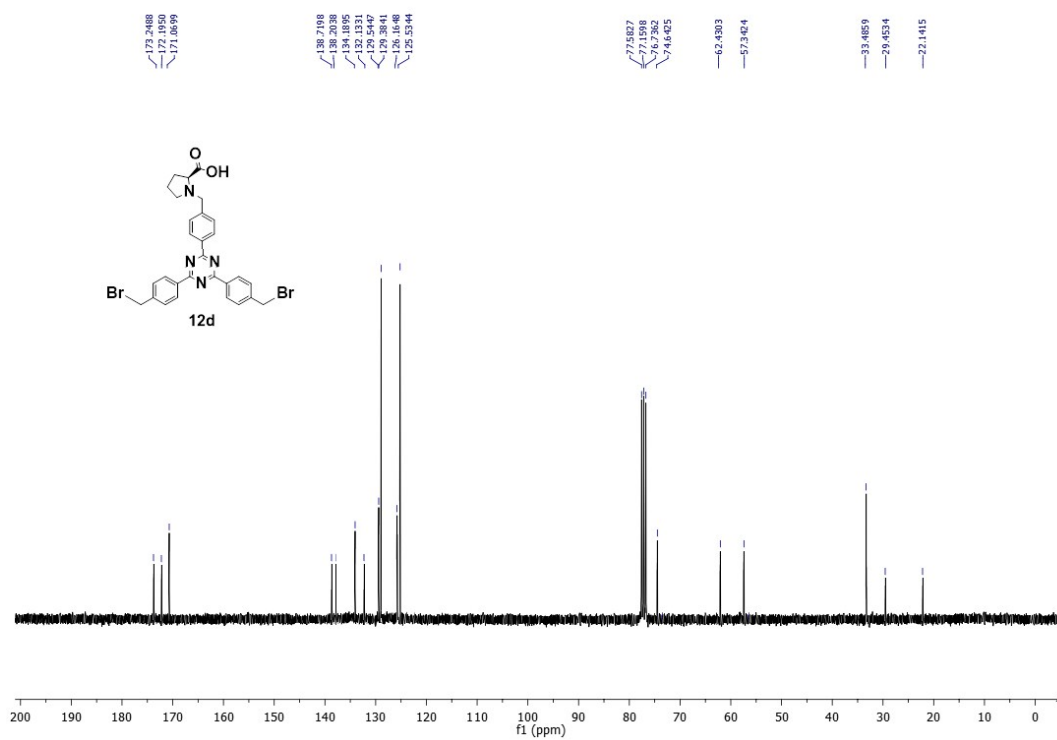

**Figure S16:** <sup>13</sup>C NMR Spectrum of C<sub>1</sub>-symmetric organocatalyst **12d**.

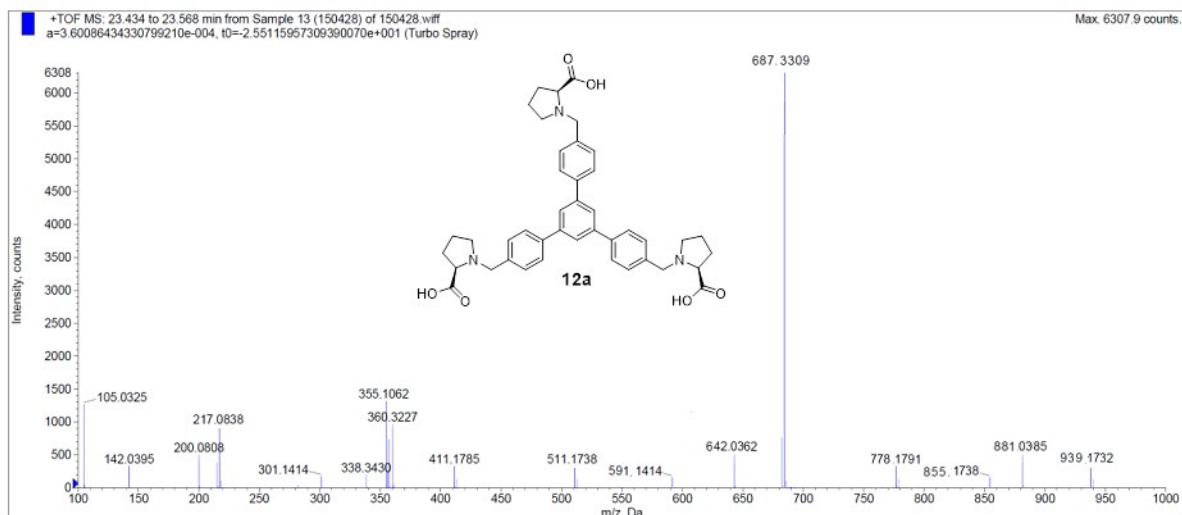

Figure S17: HR Mass for organocatalyst **12a**.

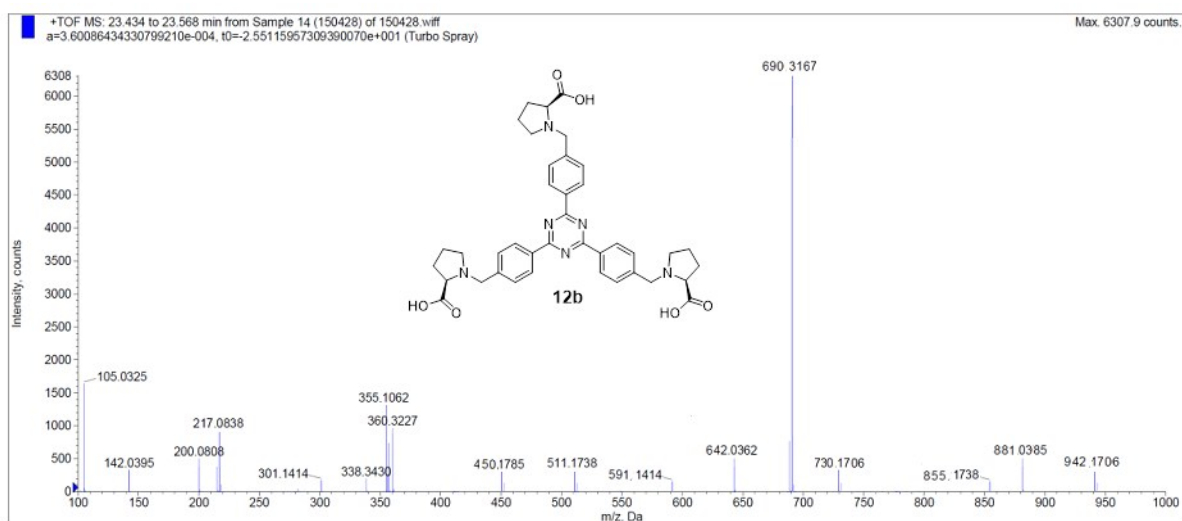

Figure S18: HR Mass for organocatalyst **12b**.

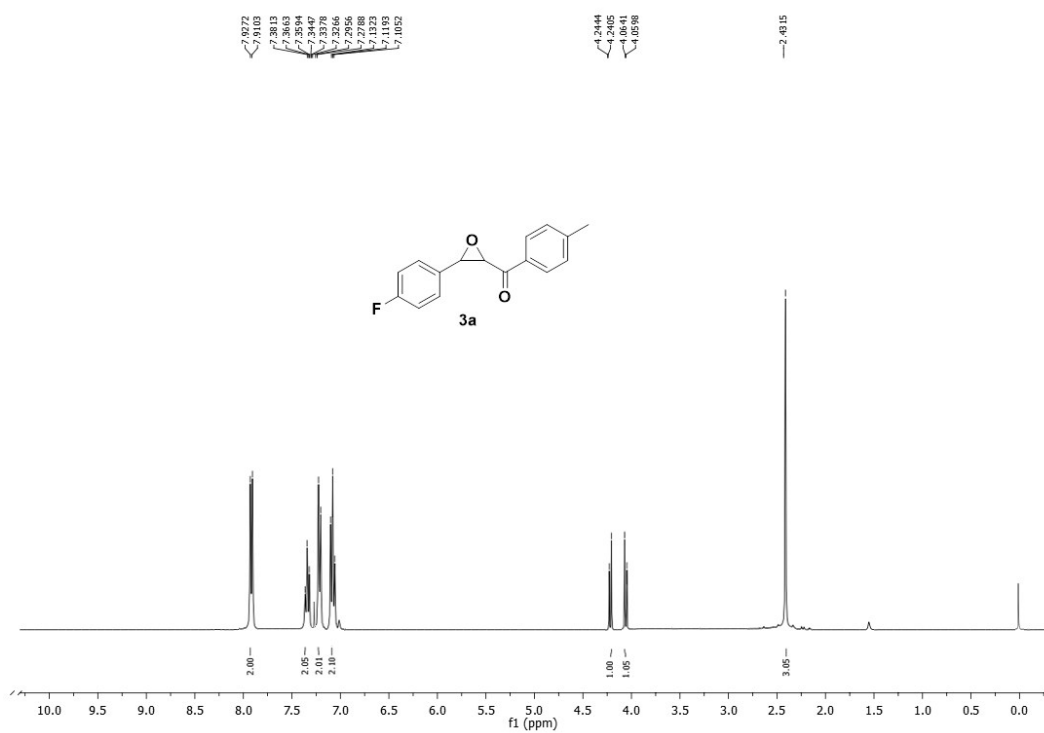

**Figure S19:** <sup>1</sup>H NMR Spectrum of  $\alpha$ ,  $\beta$ -epoxy ketone **3a**.

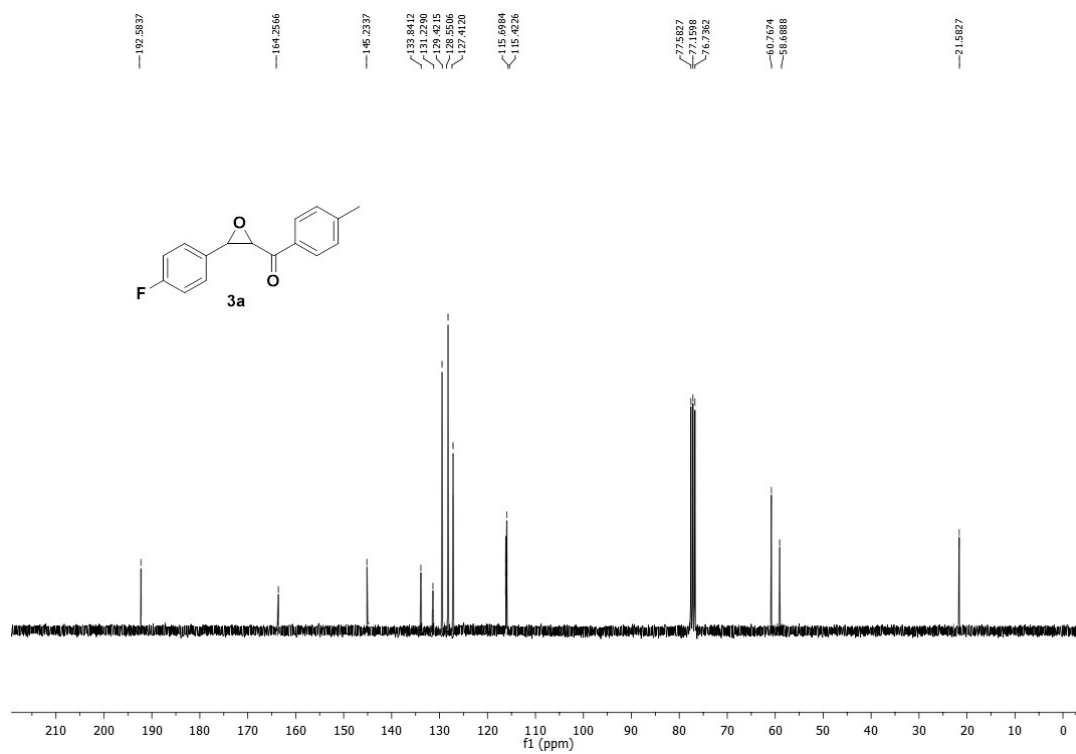

**Figure S20:** <sup>13</sup>C NMR Spectrum of  $\alpha$ ,  $\beta$ -epoxy ketone **3a**.

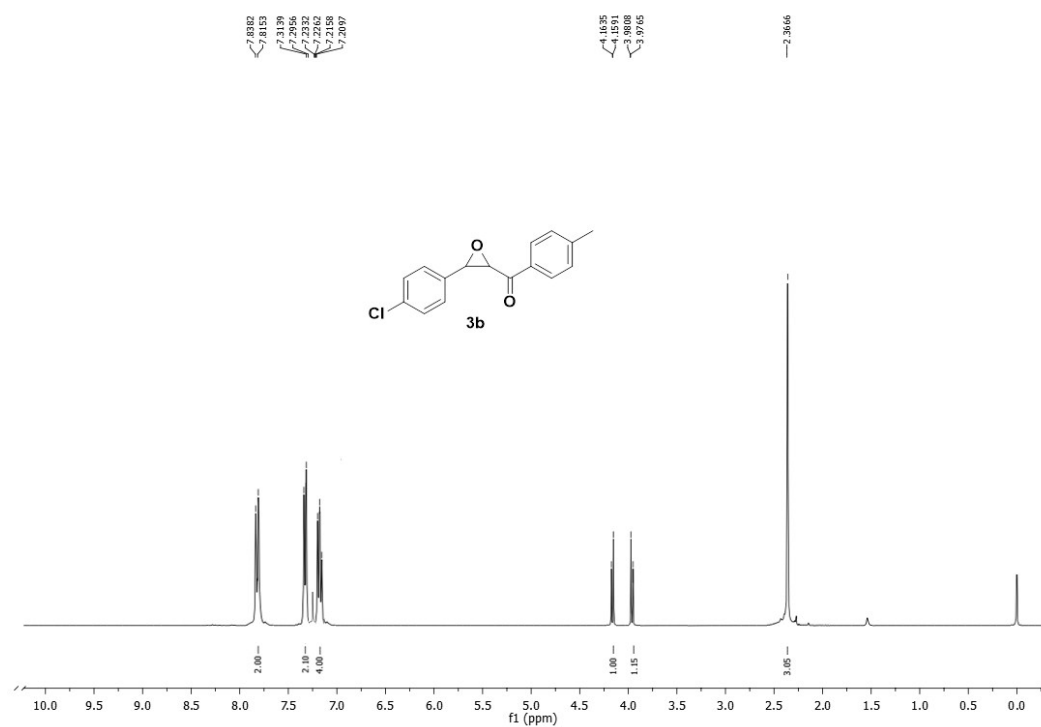

**Figure S21:** <sup>1</sup>H NMR Spectrum of  $\alpha$ ,  $\beta$ -epoxy ketone **3b**.

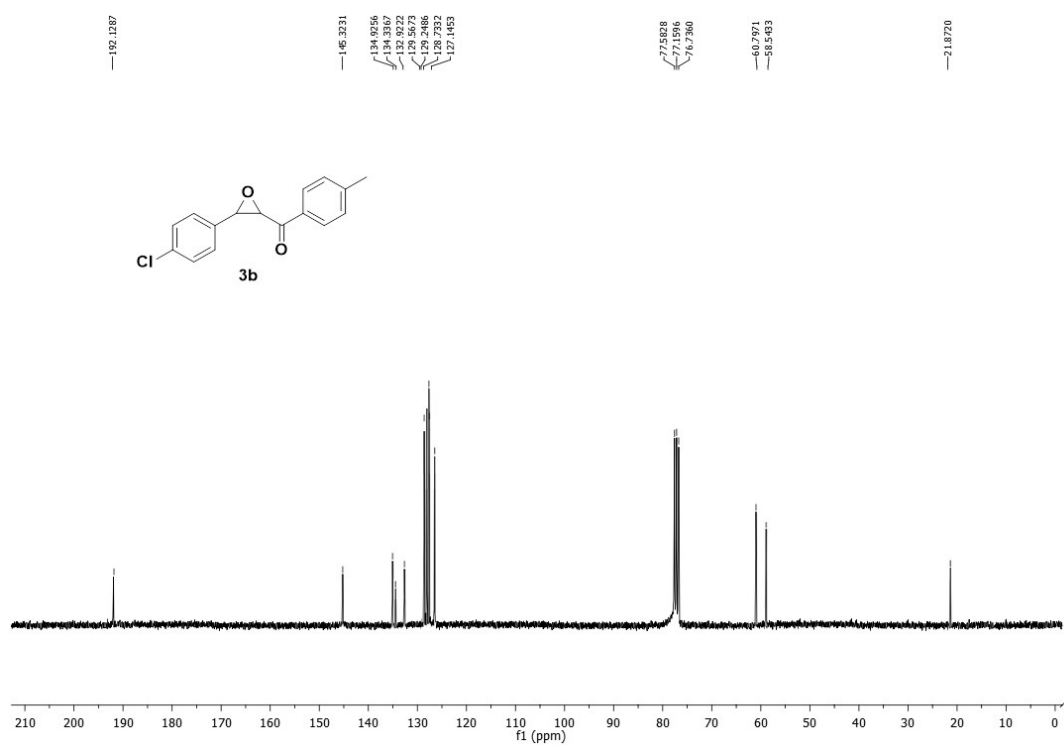

**Figure S22:** <sup>13</sup>C NMR Spectrum of  $\alpha$ ,  $\beta$ -epoxy ketone **3b**.

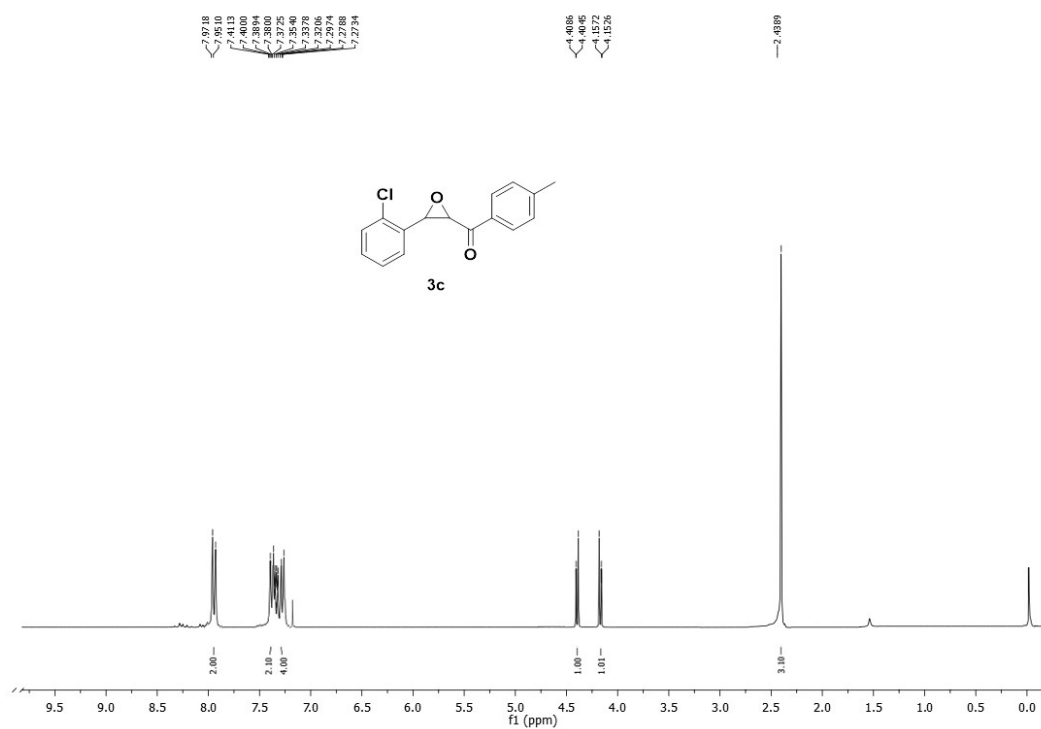

**Figure S23:** <sup>1</sup>H NMR Spectrum of  $\alpha$ ,  $\beta$ -epoxy ketone **3c**.

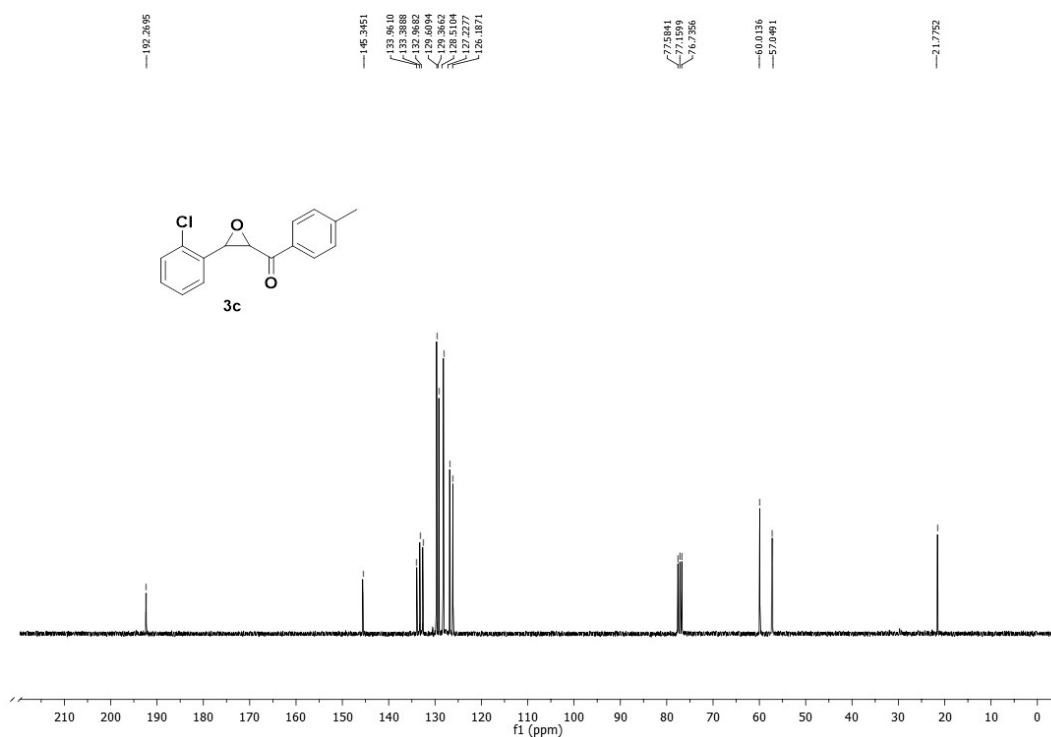

**Figure S24:** <sup>13</sup>C NMR Spectrum of  $\alpha$ ,  $\beta$ -epoxy ketone **3c**.

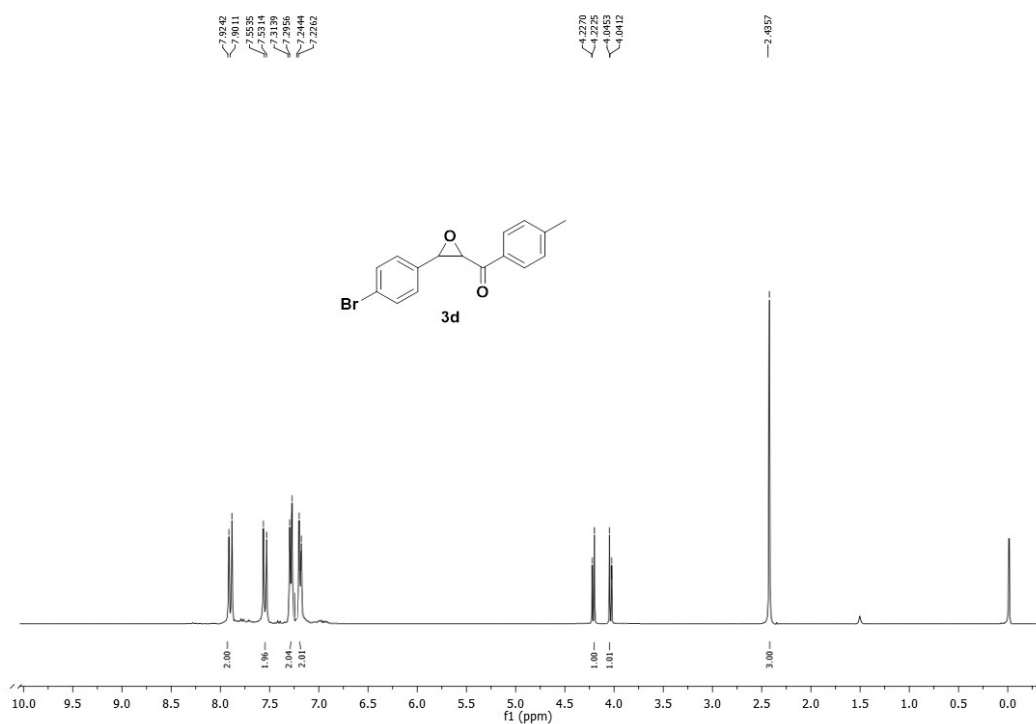

**Figure S25:** <sup>1</sup>H NMR Spectrum of  $\alpha$ ,  $\beta$ -epoxy ketone **3d**.

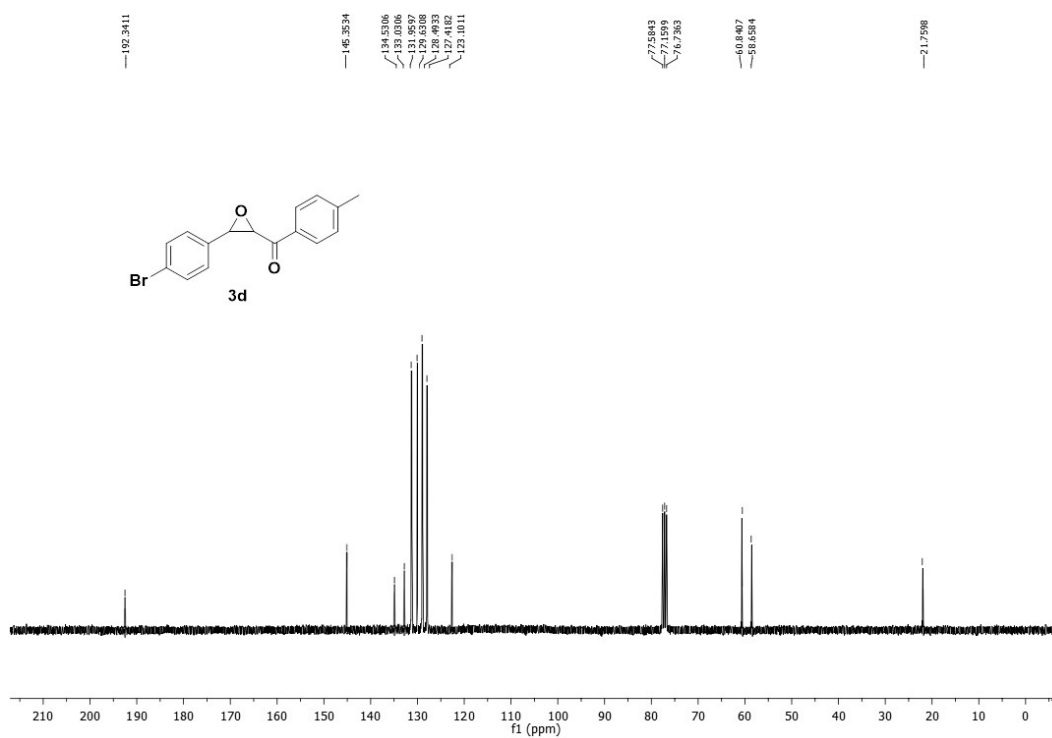

**Figure S26:** <sup>13</sup>C NMR Spectrum of  $\alpha$ ,  $\beta$ -epoxy ketone **3d**.

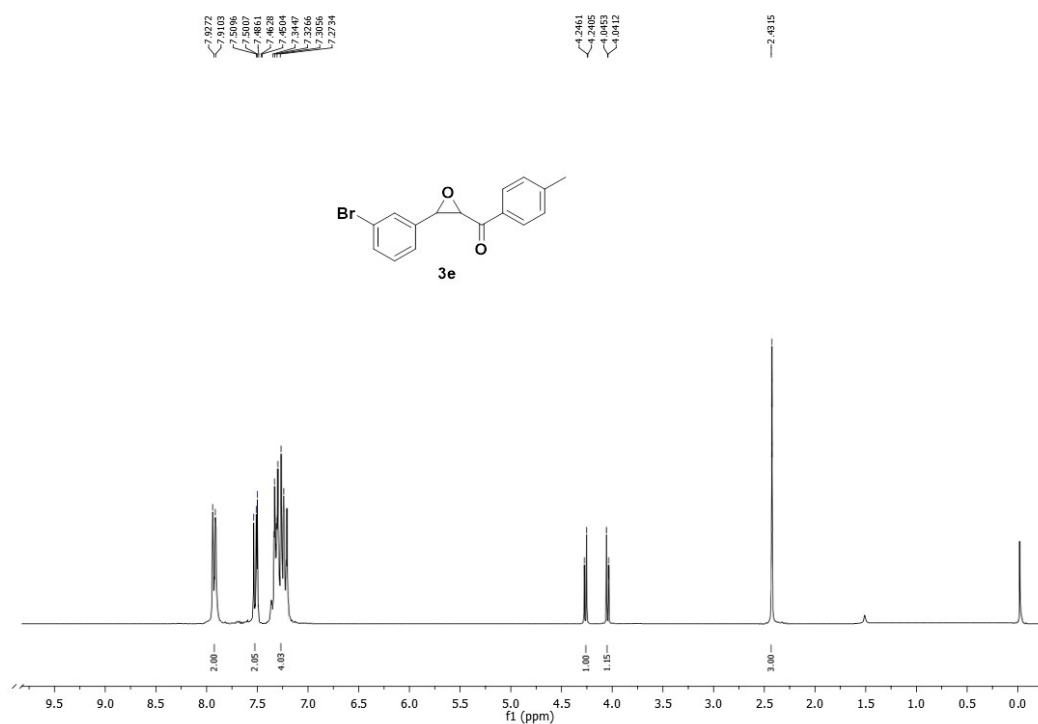

**Figure S27:** <sup>1</sup>H NMR Spectrum of  $\alpha$ ,  $\beta$ -epoxy ketone **3e**.

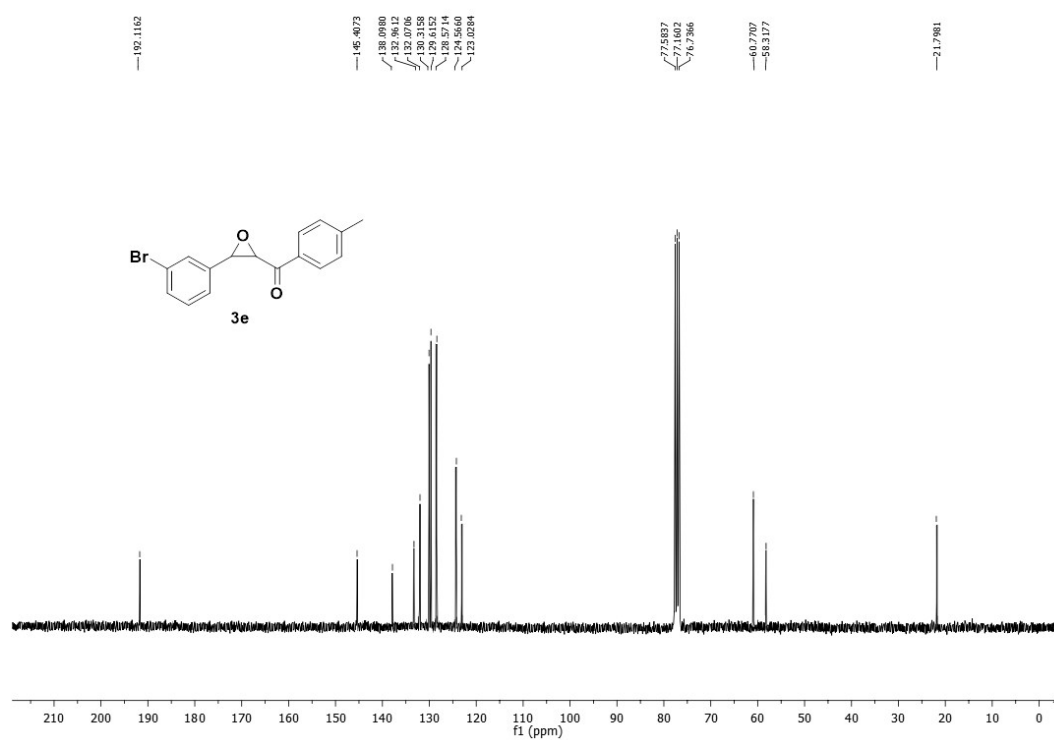

**Figure S28:** <sup>13</sup>C NMR Spectrum of  $\alpha$ ,  $\beta$ -epoxy ketone **3e**.

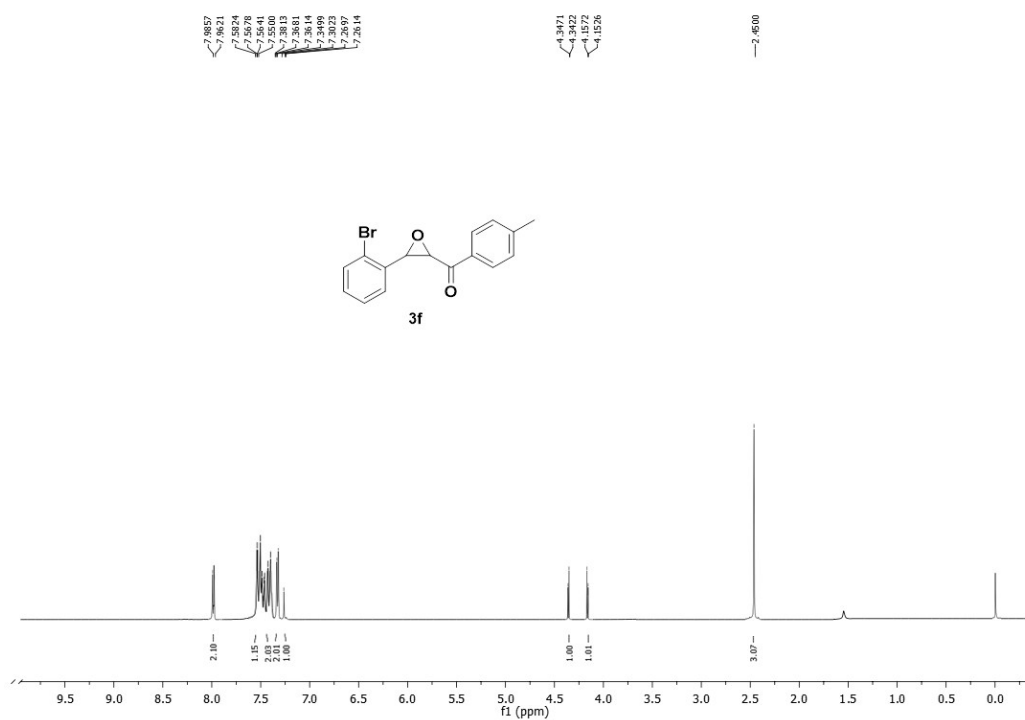

**Figure S29:** <sup>1</sup>H NMR Spectrum of  $\alpha$ ,  $\beta$ -epoxy ketone **3f**.

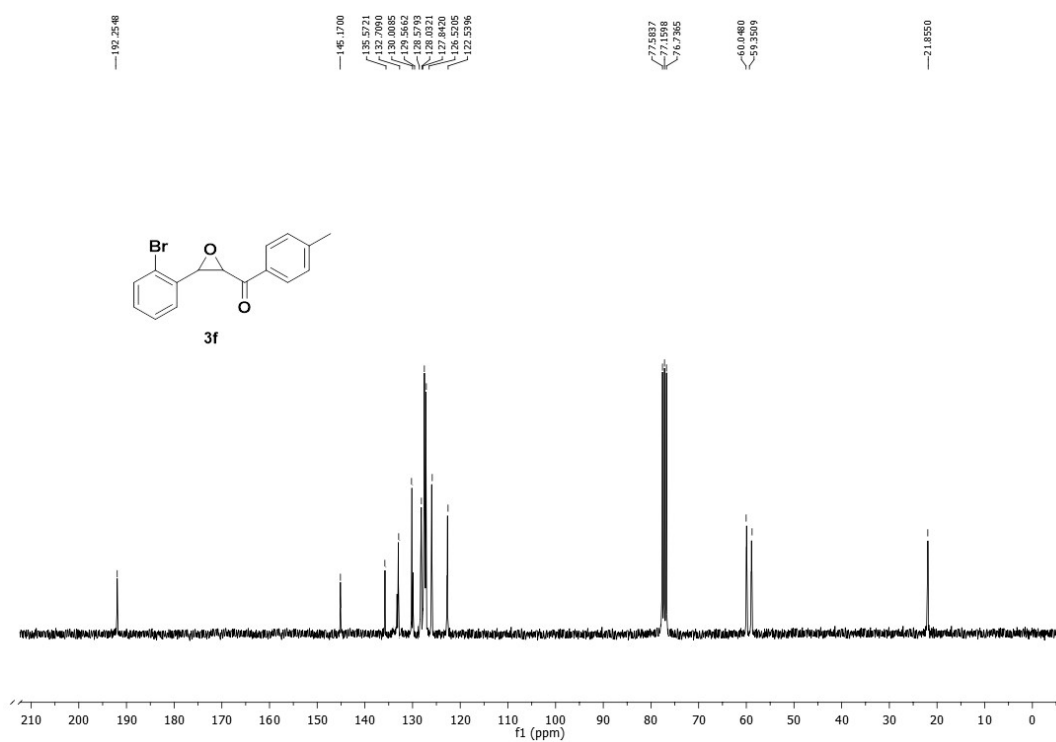

**Figure S30:** <sup>13</sup>C NMR Spectrum of  $\alpha$ ,  $\beta$ -epoxy ketone **3f**.

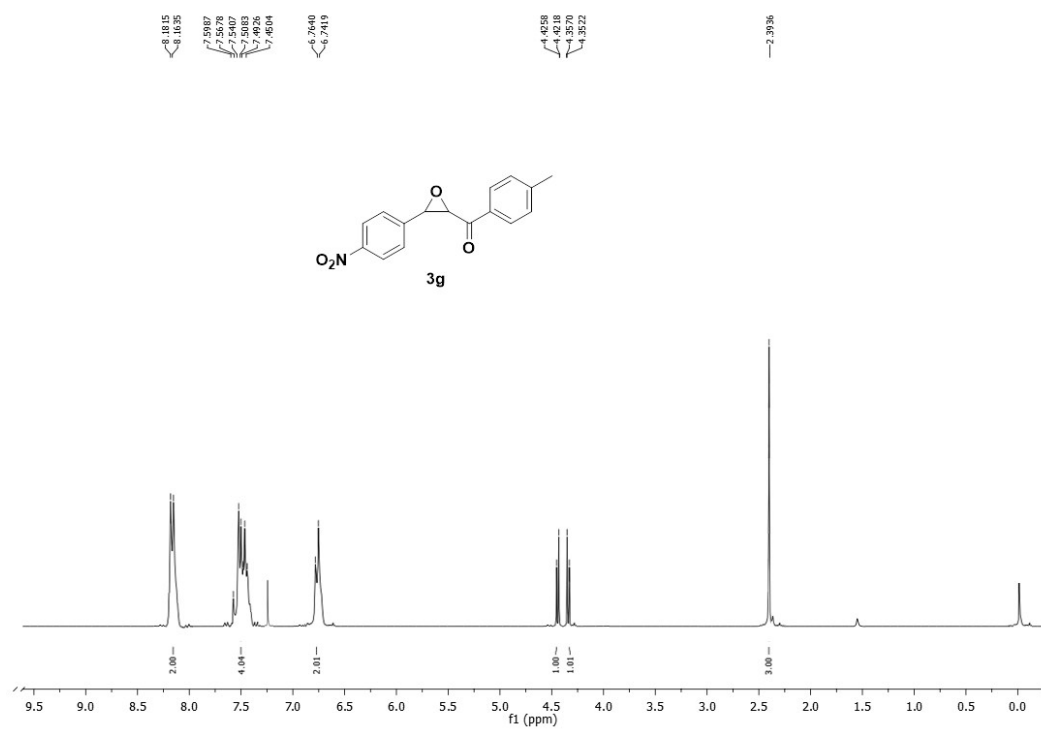

**Figure S31:** <sup>1</sup>H NMR Spectrum of  $\alpha$ ,  $\beta$ -epoxy ketone **3g**.

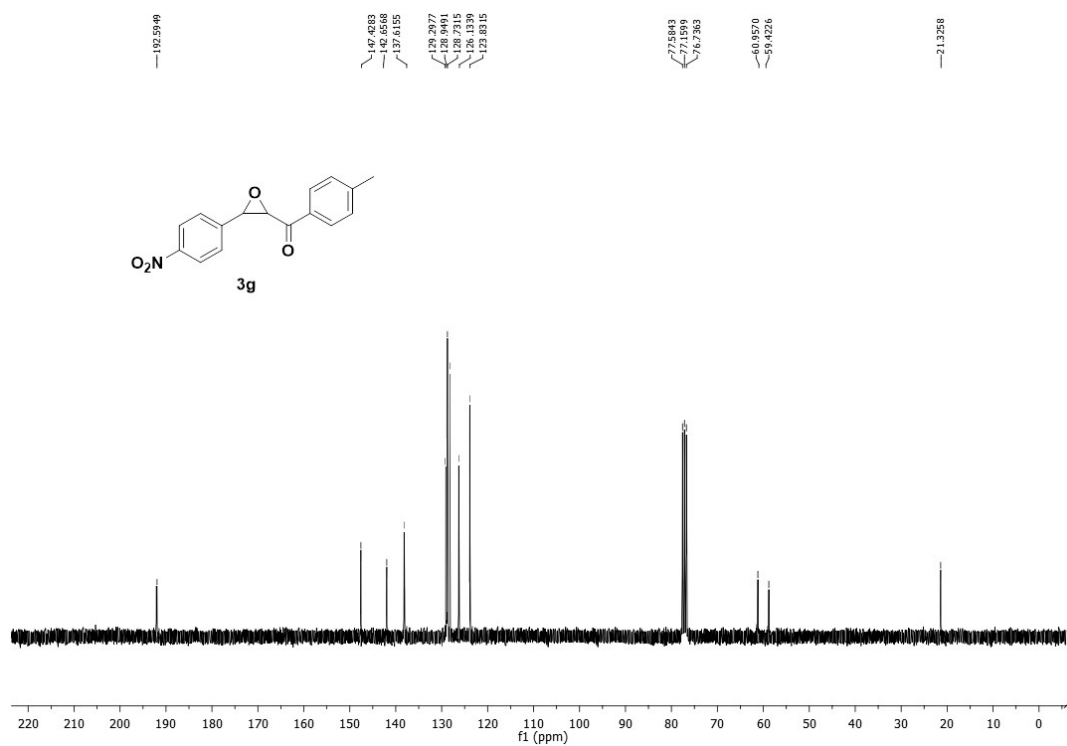

**Figure S32:** <sup>13</sup>C NMR Spectrum of  $\alpha$ ,  $\beta$ -epoxy ketone **3g**.

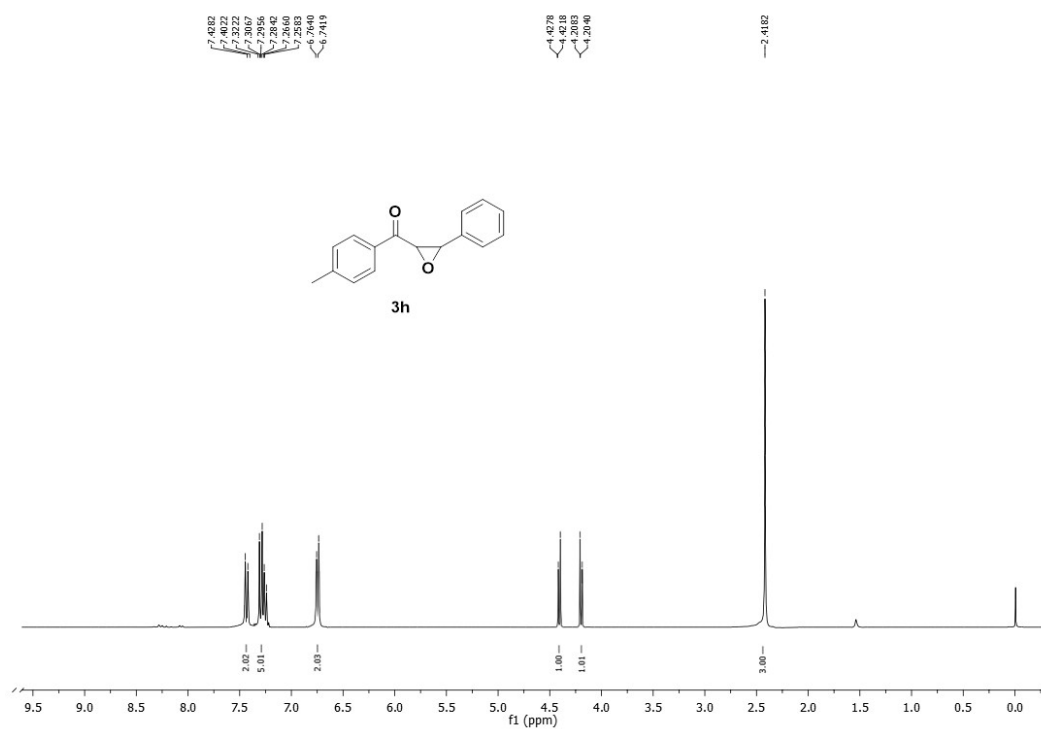

**Figure S33:** <sup>1</sup>H NMR Spectrum of  $\alpha$ ,  $\beta$ -epoxy ketone **3h**.

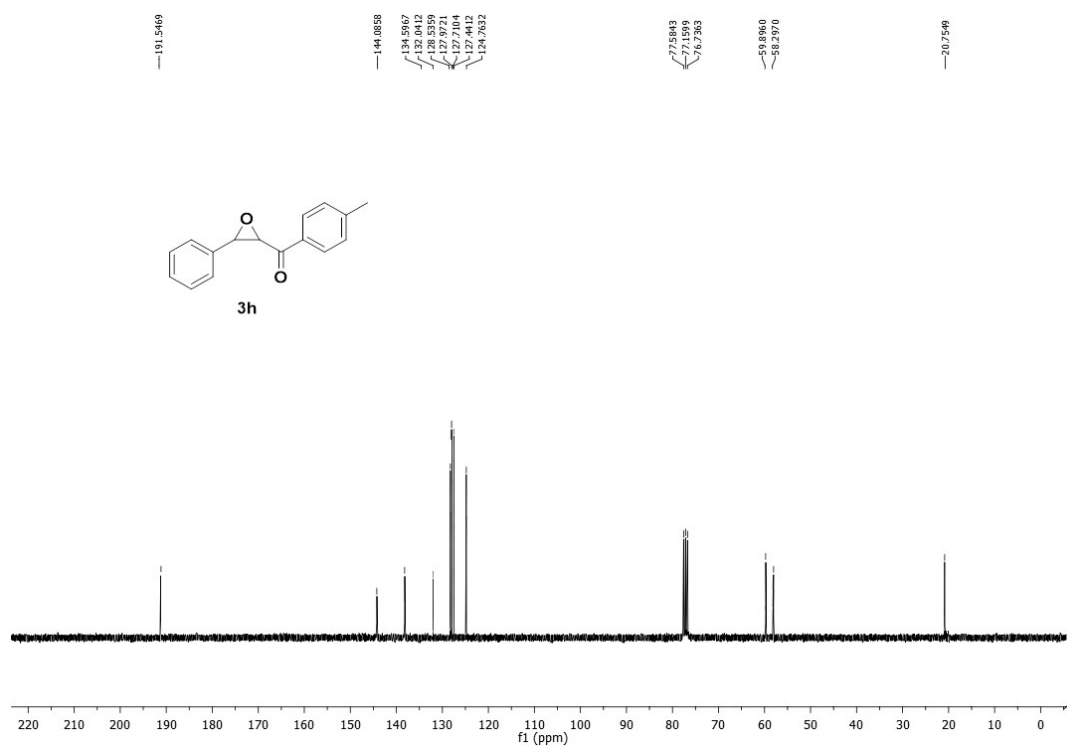

**Figure S34:** <sup>13</sup>C NMR Spectrum of  $\alpha$ ,  $\beta$ -epoxy ketone **3h**.

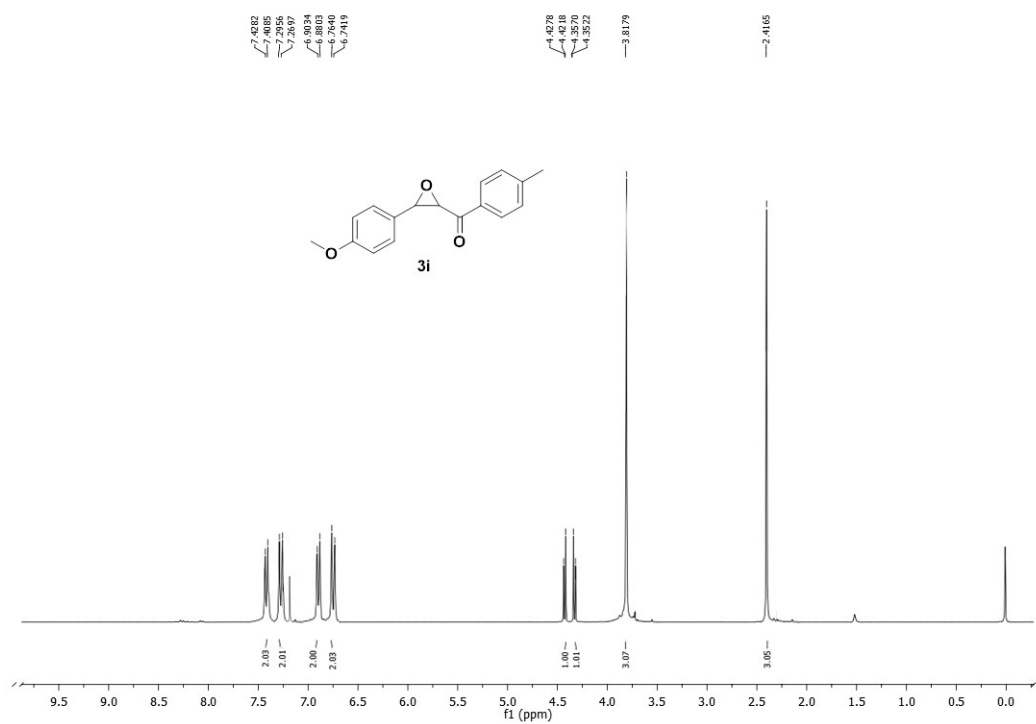

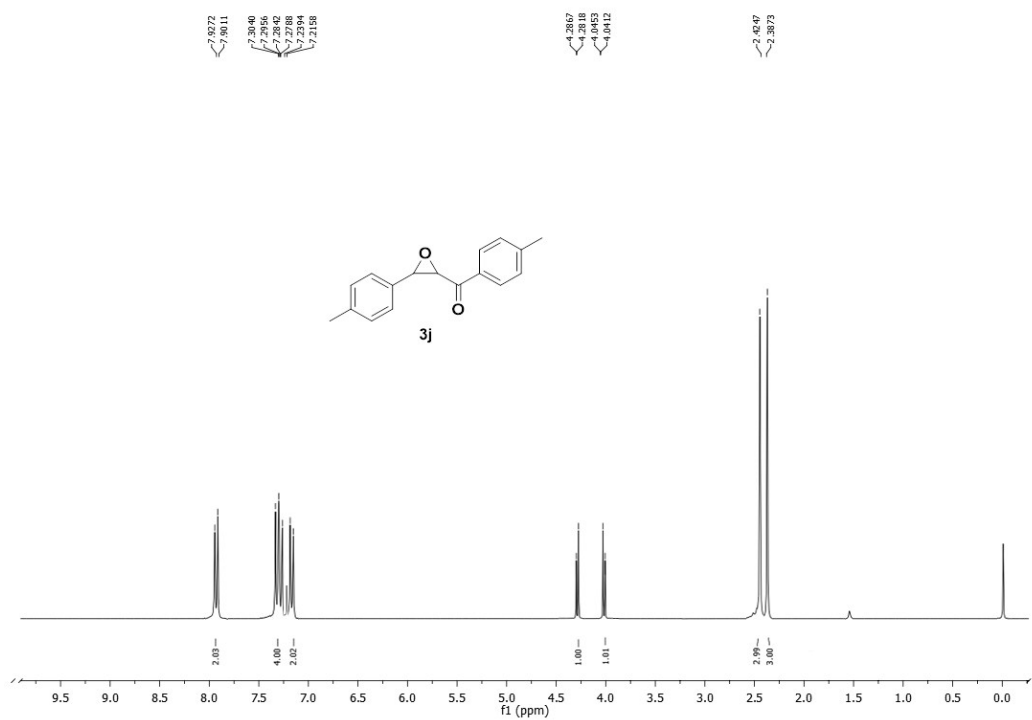

**Figure S37:** <sup>1</sup>H NMR Spectrum of  $\alpha$ ,  $\beta$ -epoxy ketone **3j**.

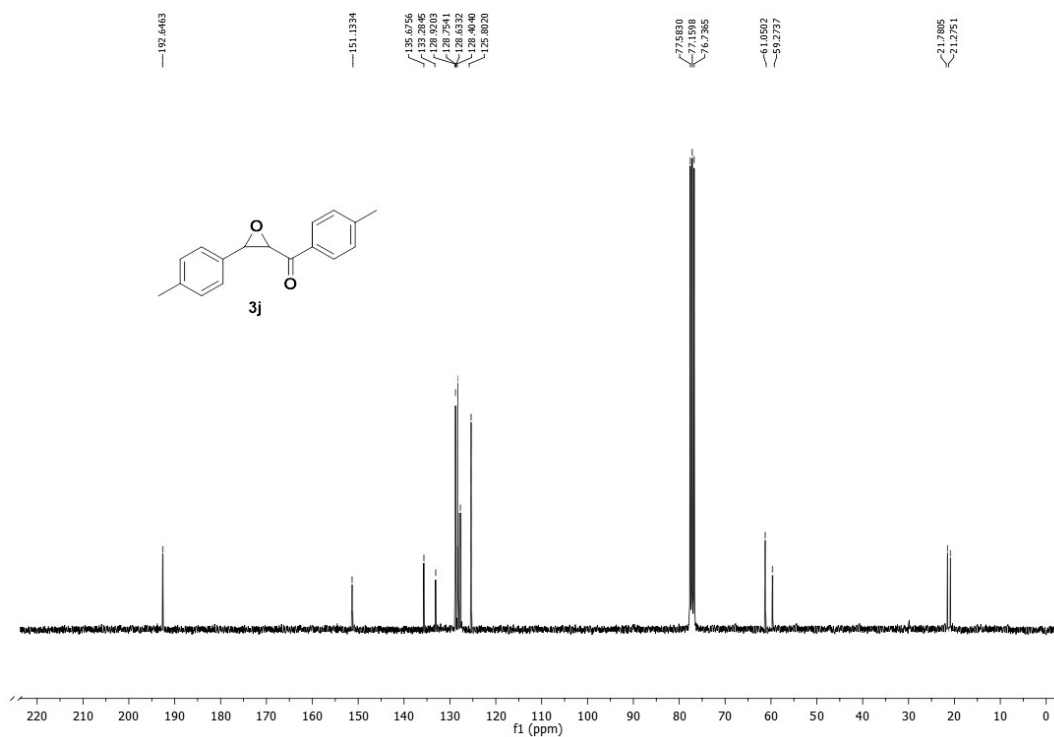

**Figure S38:** <sup>13</sup>C NMR Spectrum of  $\alpha$ ,  $\beta$ -epoxy ketone **3j**.

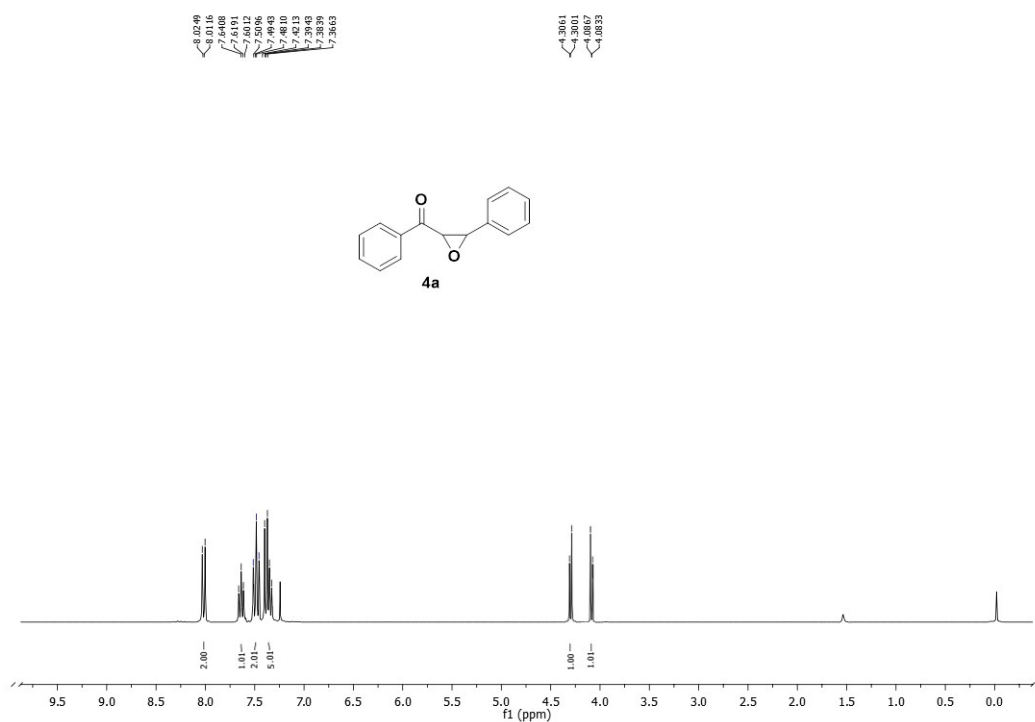

**Figure S39:** <sup>1</sup>H NMR Spectrum of α, β-epoxy ketone **4a**.

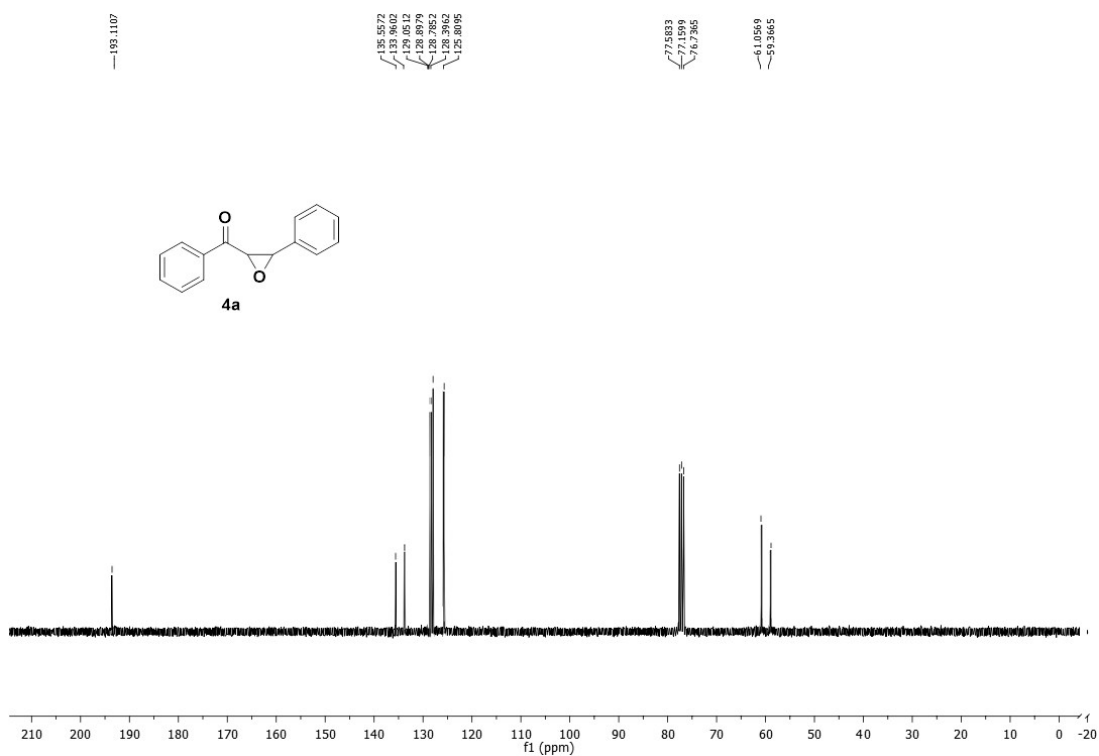

**Figure S40:** <sup>13</sup>C NMR Spectrum of α, β-epoxy ketone **4a**.

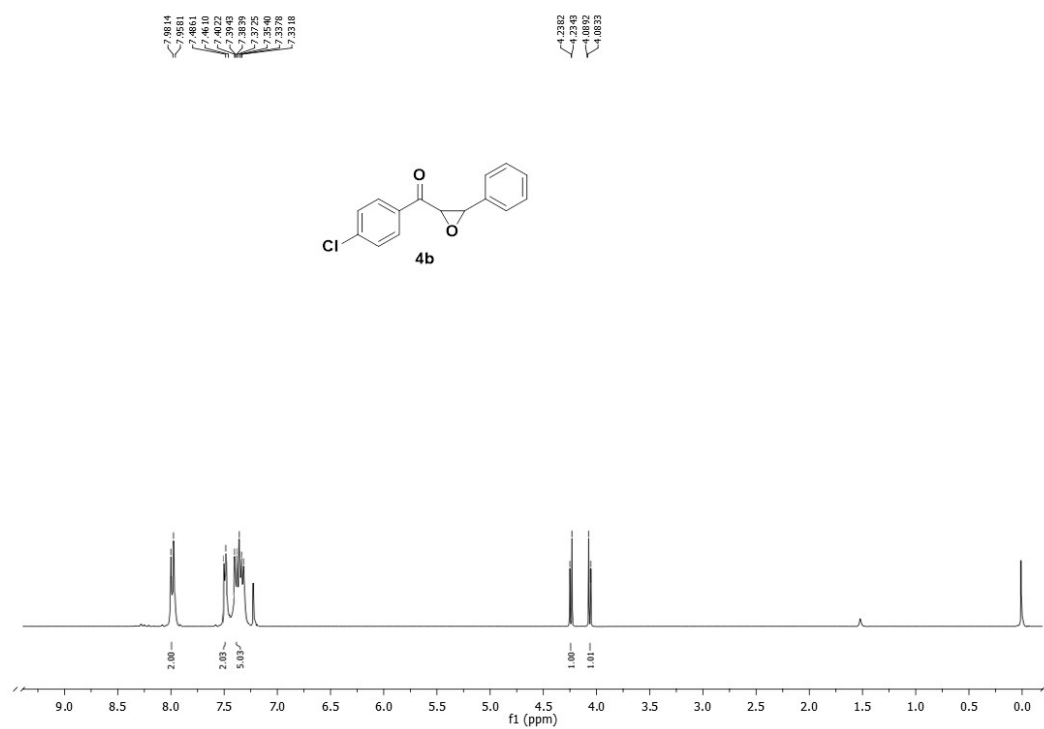

**Figure S41:** <sup>1</sup>H NMR Spectrum of  $\alpha$ ,  $\beta$ -epoxy ketone **4b**.

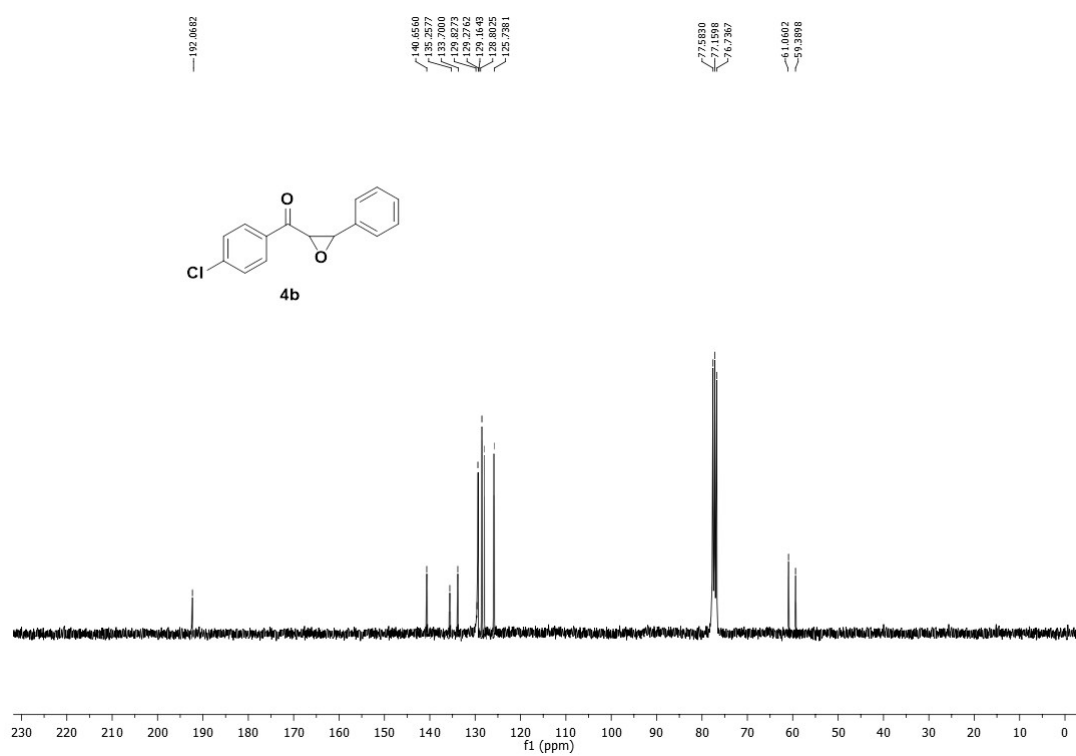

**Figure S42:** <sup>13</sup>C NMR Spectrum of  $\alpha$ ,  $\beta$ -epoxy ketone **4b**.

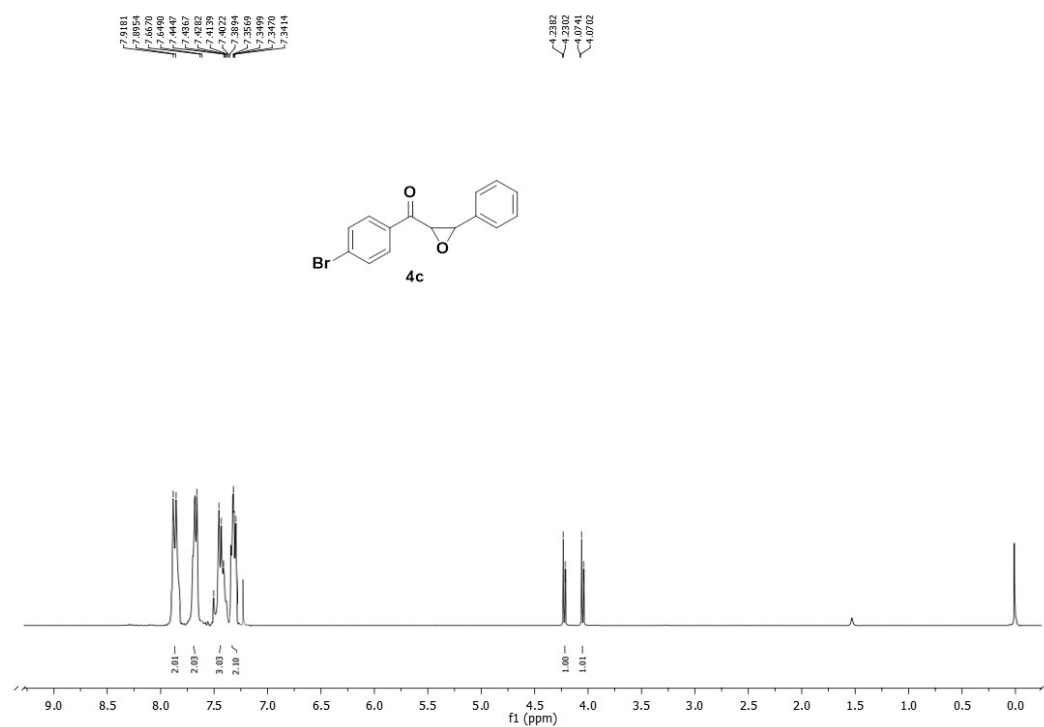

**Figure S43:** <sup>1</sup>H NMR Spectrum of  $\alpha$ ,  $\beta$ -epoxy ketone **4c**.

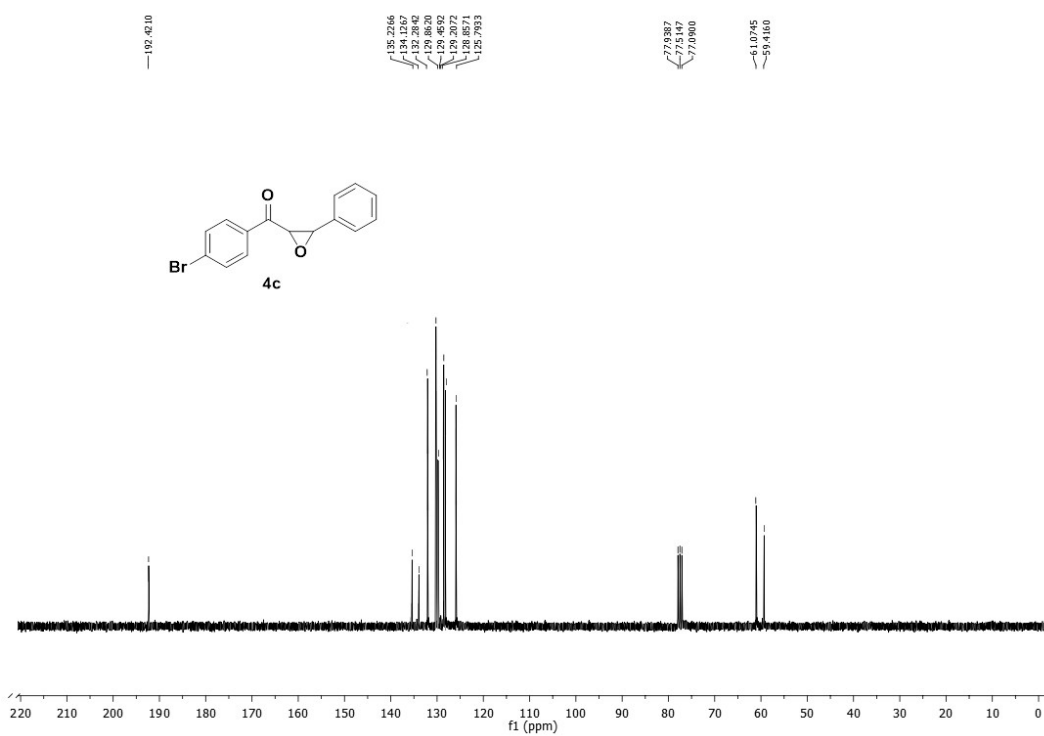

**Figure S44:** <sup>13</sup>C NMR Spectrum of  $\alpha$ ,  $\beta$ -epoxy ketone **4c**.

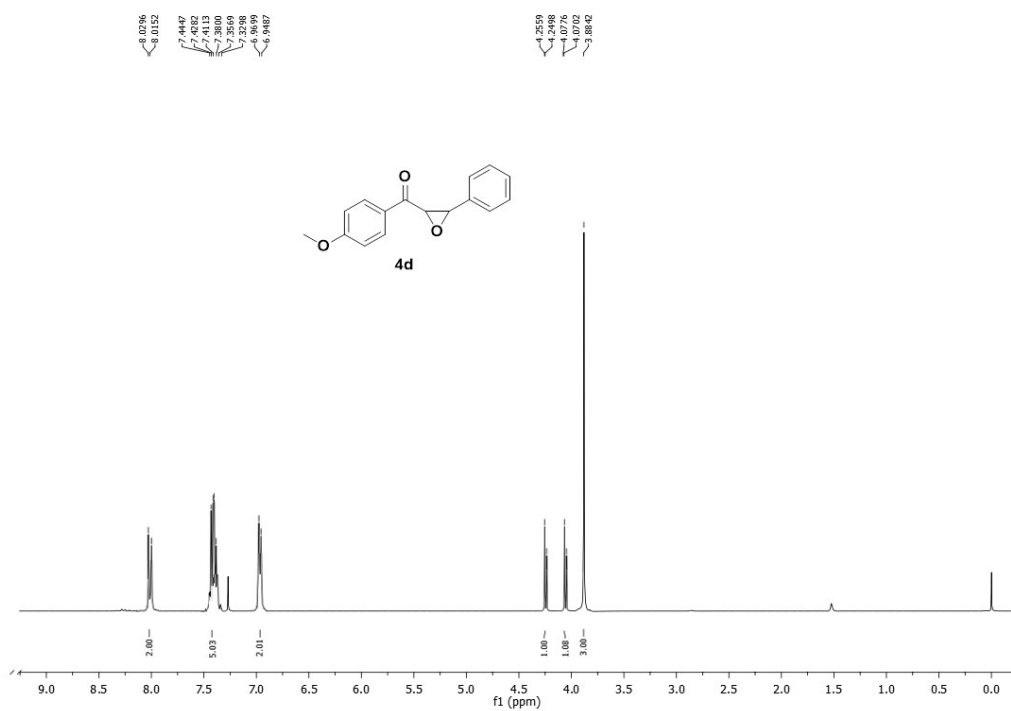

**Figure S45:** <sup>1</sup>H NMR Spectrum of  $\alpha$ ,  $\beta$ -epoxy ketone **4d**.

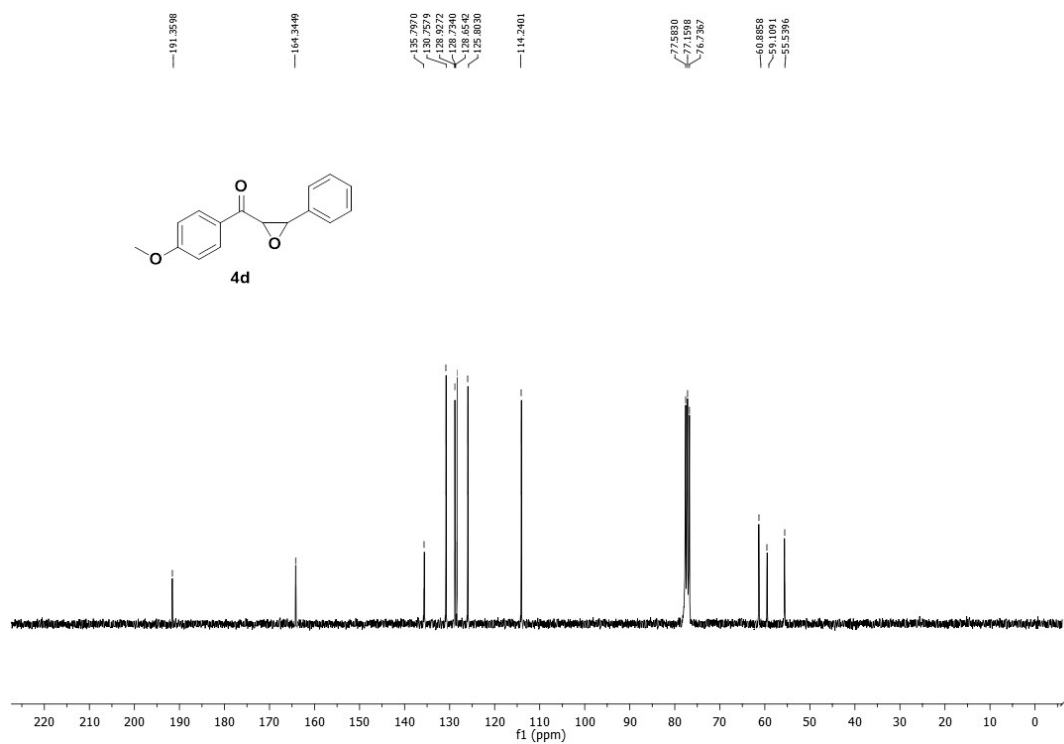

**Figure S46:** <sup>13</sup>C NMR Spectrum of  $\alpha$ ,  $\beta$ -epoxy ketone **4d**.

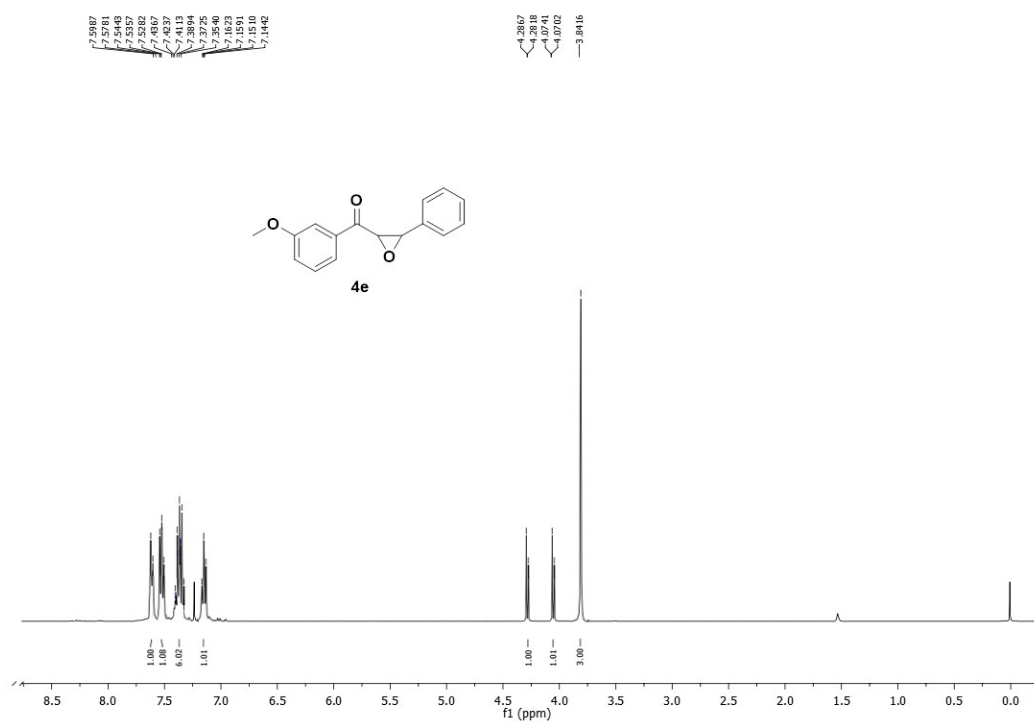

Figure S47:  $^1\text{H}$  NMR Spectrum of  $\alpha, \beta$ -epoxy ketone **4e**.

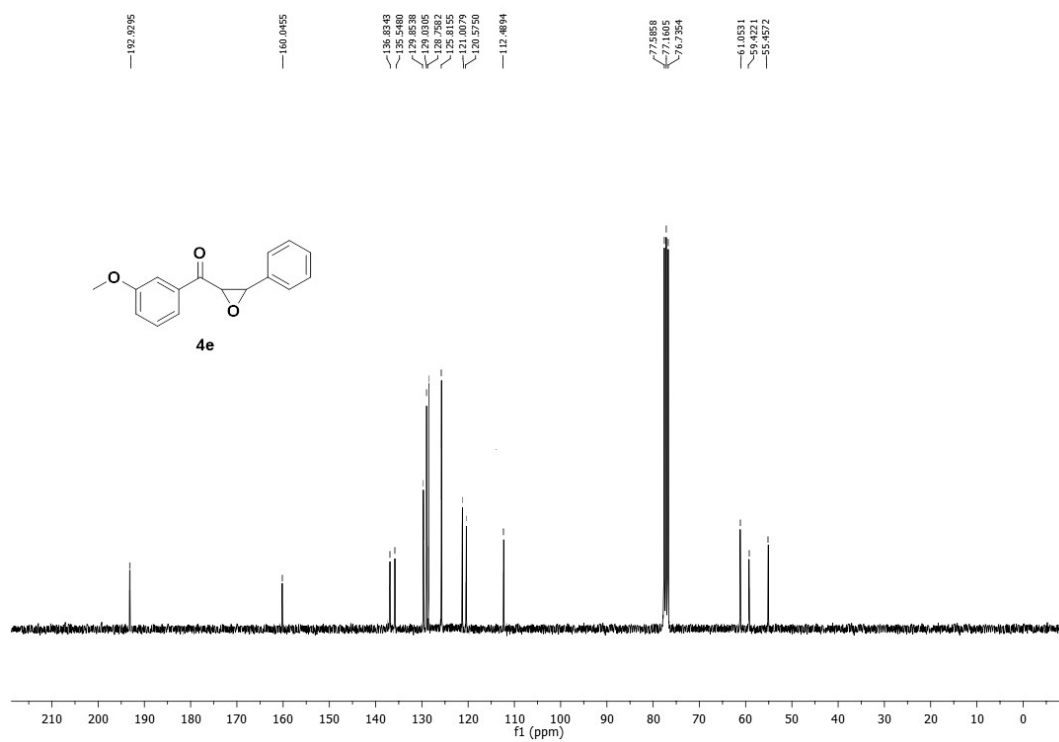

Figure S48:  $^{13}\text{C}$  NMR Spectrum of  $\alpha, \beta$ -epoxy ketone **4e**.

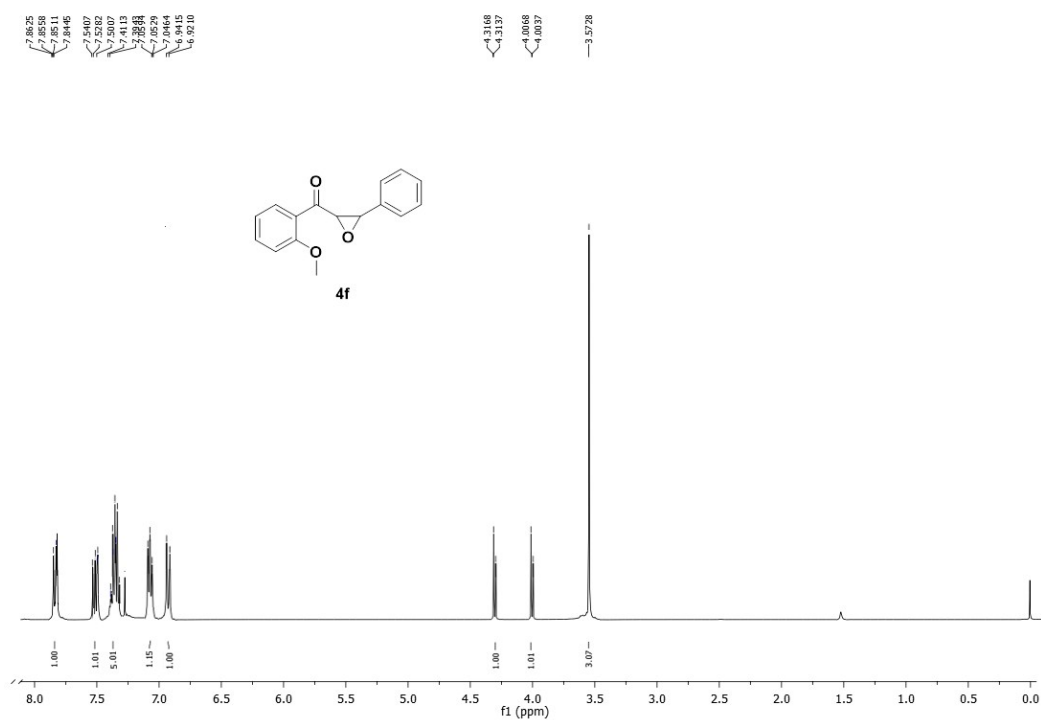

Figure S49: <sup>1</sup>H NMR Spectrum of  $\alpha$ ,  $\beta$ -epoxy ketone **4f**.

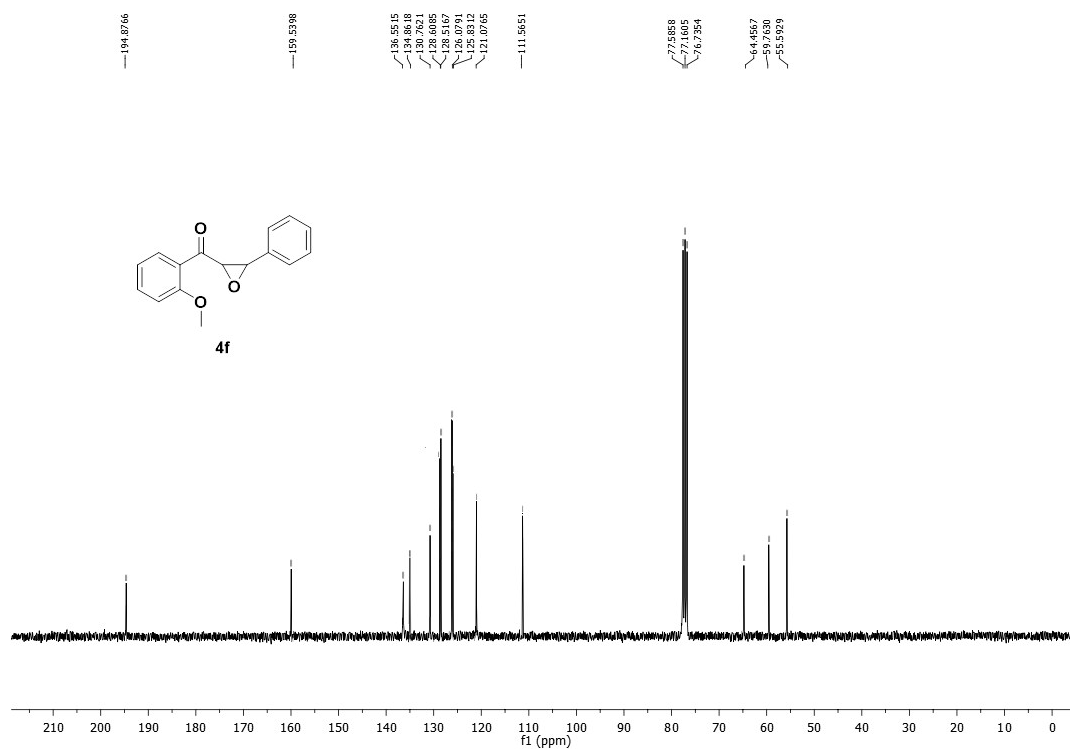

Figure S50: <sup>13</sup>C NMR Spectrum of  $\alpha$ ,  $\beta$ -epoxy ketone **4f**.

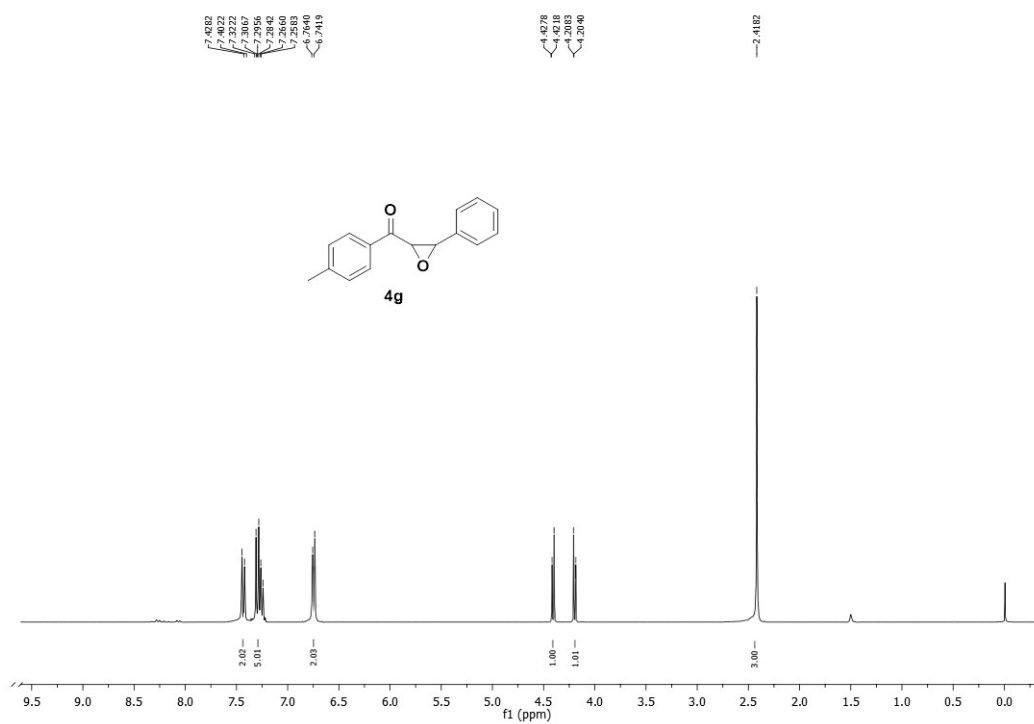

**Figure S51:** <sup>1</sup>H NMR Spectrum of  $\alpha$ ,  $\beta$ -epoxy ketone **4g**.

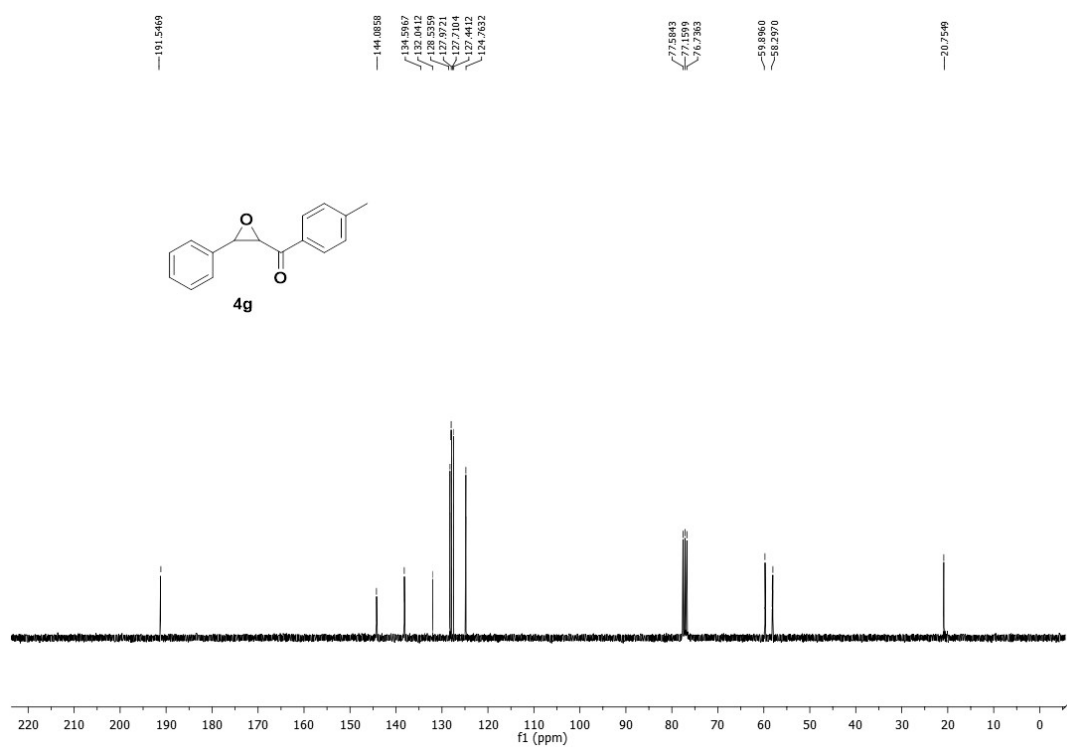

**Figure S52:** <sup>13</sup>C NMR Spectrum of  $\alpha$ ,  $\beta$ -epoxy ketone **4g**.

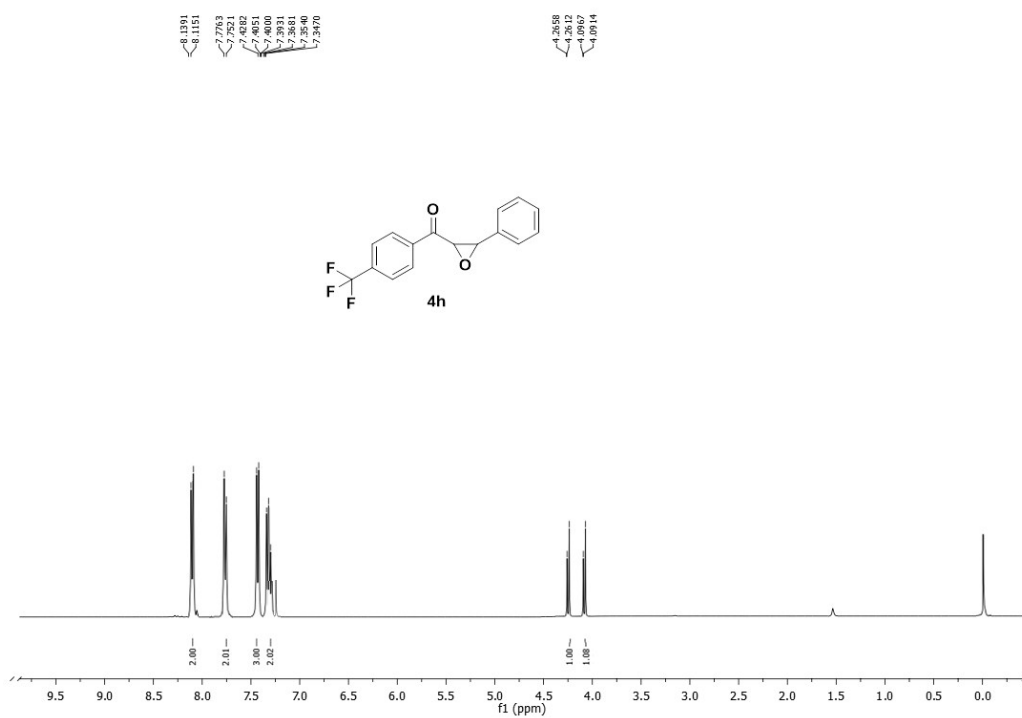

**Figure S53:** <sup>1</sup>H NMR Spectrum of  $\alpha$ ,  $\beta$ -epoxy ketone **4h**.

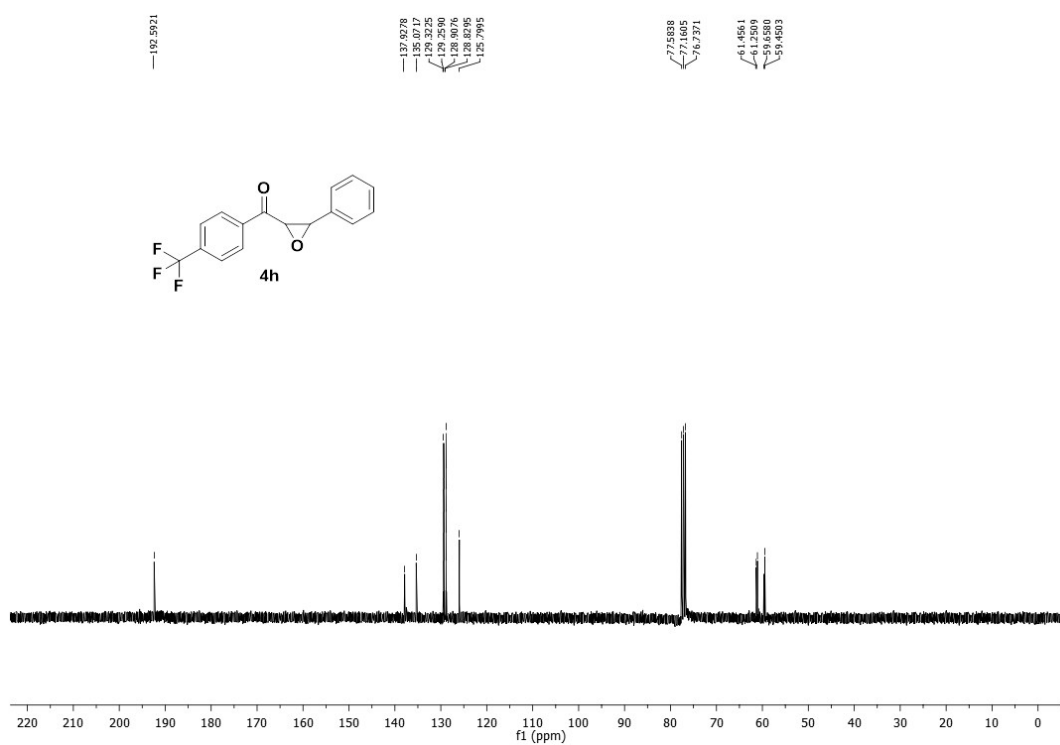

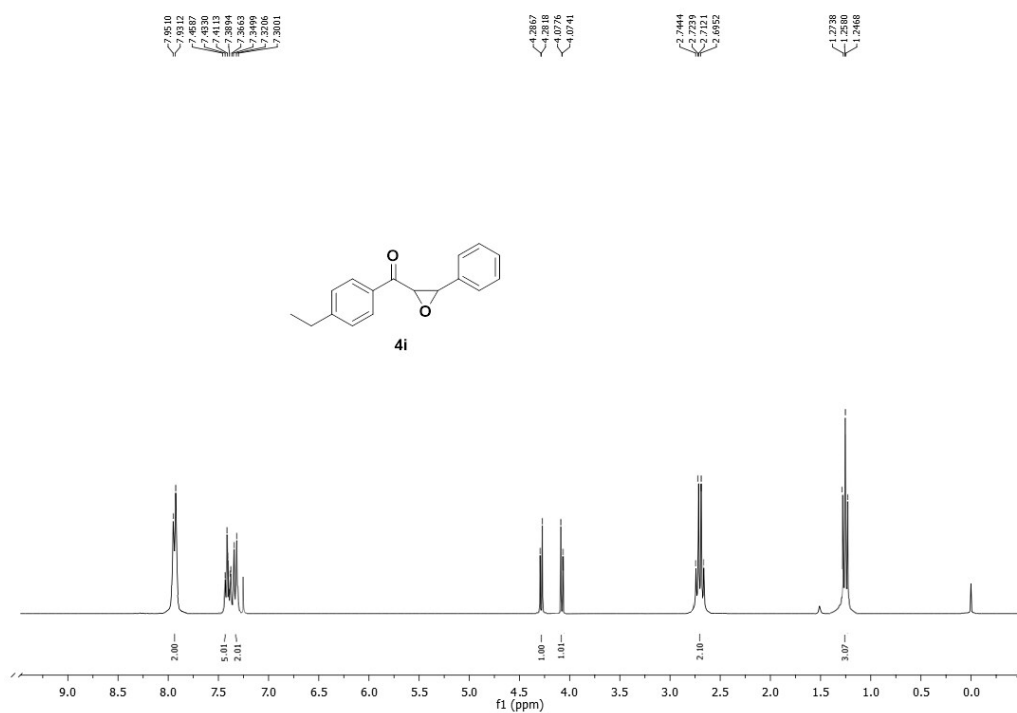

**Figure S55:** <sup>1</sup>H NMR Spectrum of  $\alpha$ ,  $\beta$ -epoxy ketone **4i**.

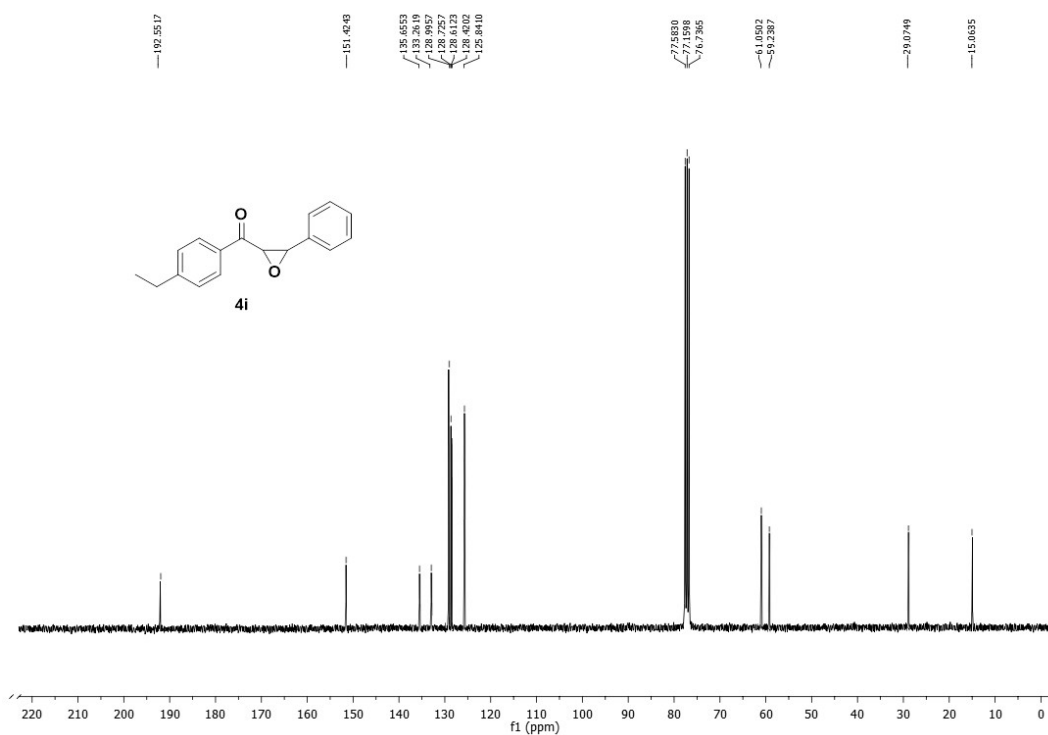

**Figure S56:** <sup>13</sup>C NMR Spectrum of  $\alpha$ ,  $\beta$ -epoxy ketone **4i**.

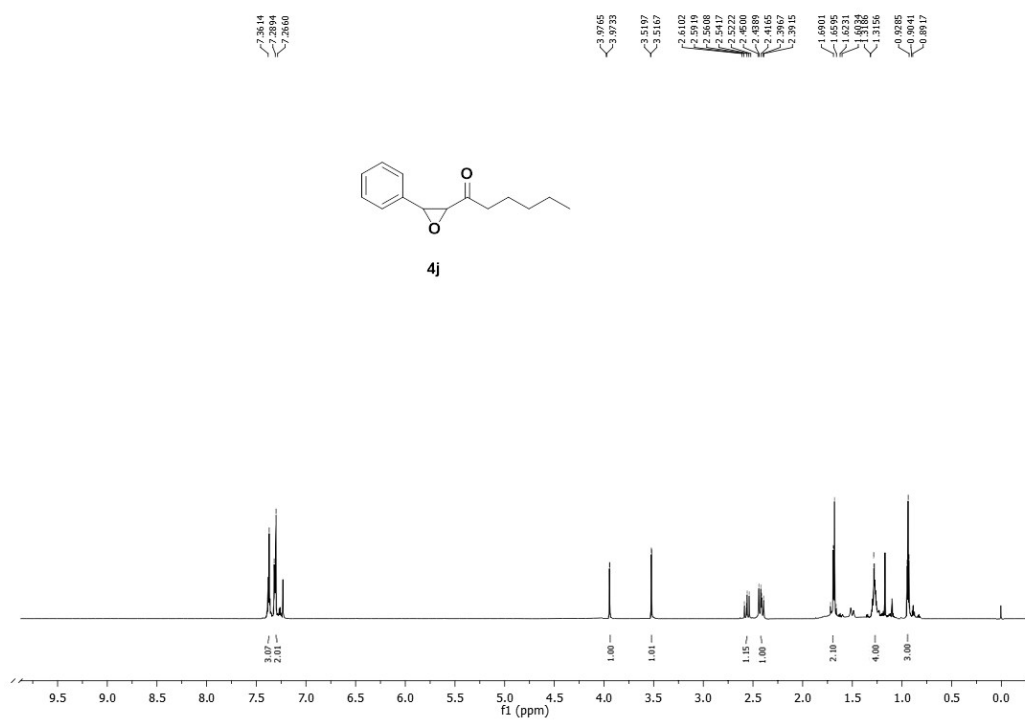

Figure S57: <sup>1</sup>H NMR Spectrum of  $\alpha, \beta$ -epoxy ketone **4j**.

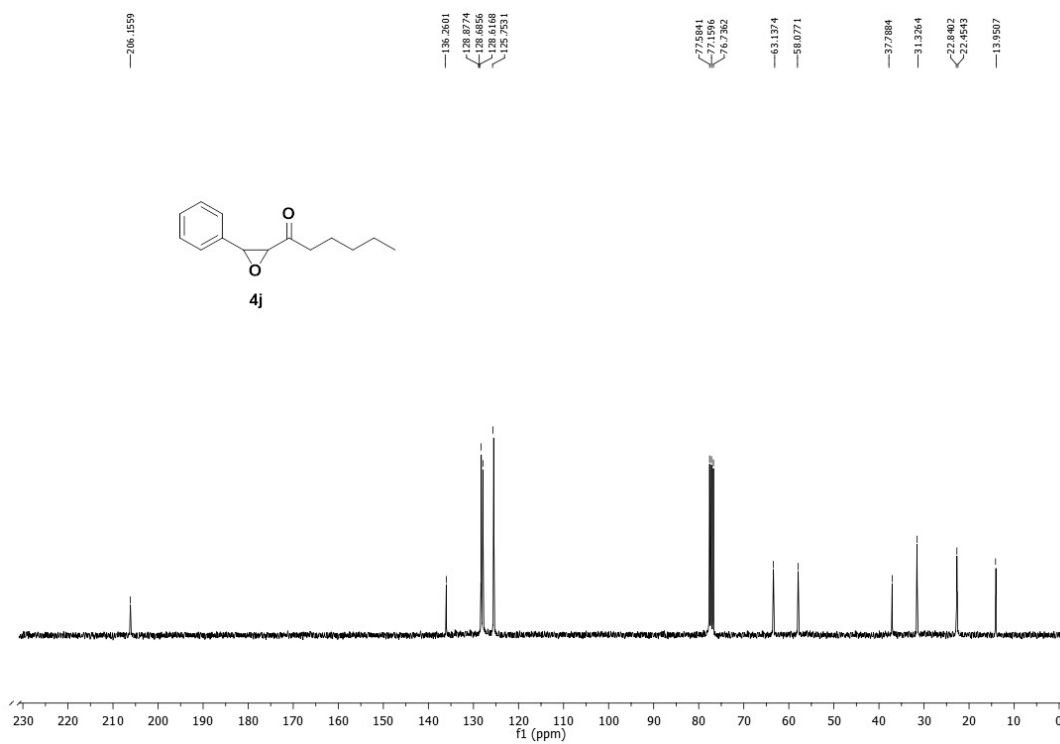

Figure S58: <sup>13</sup>C NMR Spectrum of  $\alpha, \beta$ -epoxy ketone **4j**.

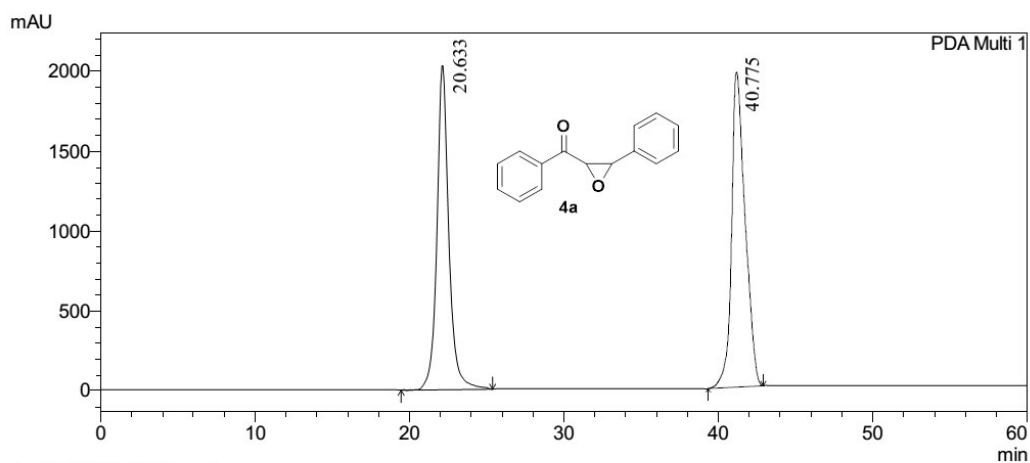

PeakTable

| Peak# | Ret. Time | Area    | Height | Area %  | Height % |
|-------|-----------|---------|--------|---------|----------|
| 1     | 20.633    | 1973568 | 8839   | 50.216  | 51.640   |
| 2     | 40.775    | 1877623 | 8633   | 49.784  | 48.360   |
| Total |           | 3851191 | 17472  | 100.000 | 100.000  |

**Figure S59:** HPLC chromatogram of **(4a)** Racemic mixture.

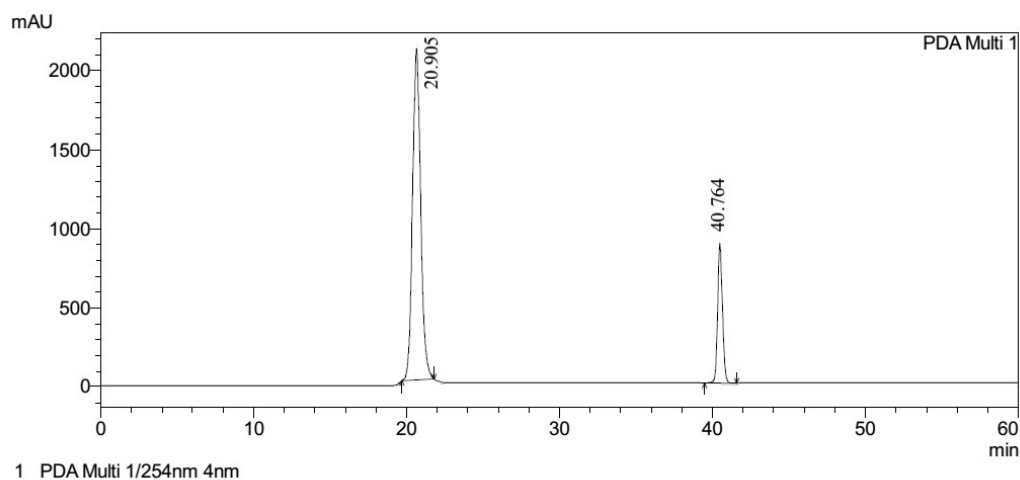

PeakTable

| Peak# | Ret. Time | Area    | Height | Area %  | Height % |
|-------|-----------|---------|--------|---------|----------|
| 1     | 20.905    | 3986453 | 97339  | 73.611  | 85.579   |
| 2     | 40.764    | 1659166 | 16403  | 26.389  | 14.421   |
| Total |           | 5645619 | 113742 | 100.000 | 100.000  |

**Figure S60:** HPLC chromatogram of **(4a)** in the presence 2 mol % of organocatalyst **(12a)** and TBHP/**Ethanol** in room temperature condition.

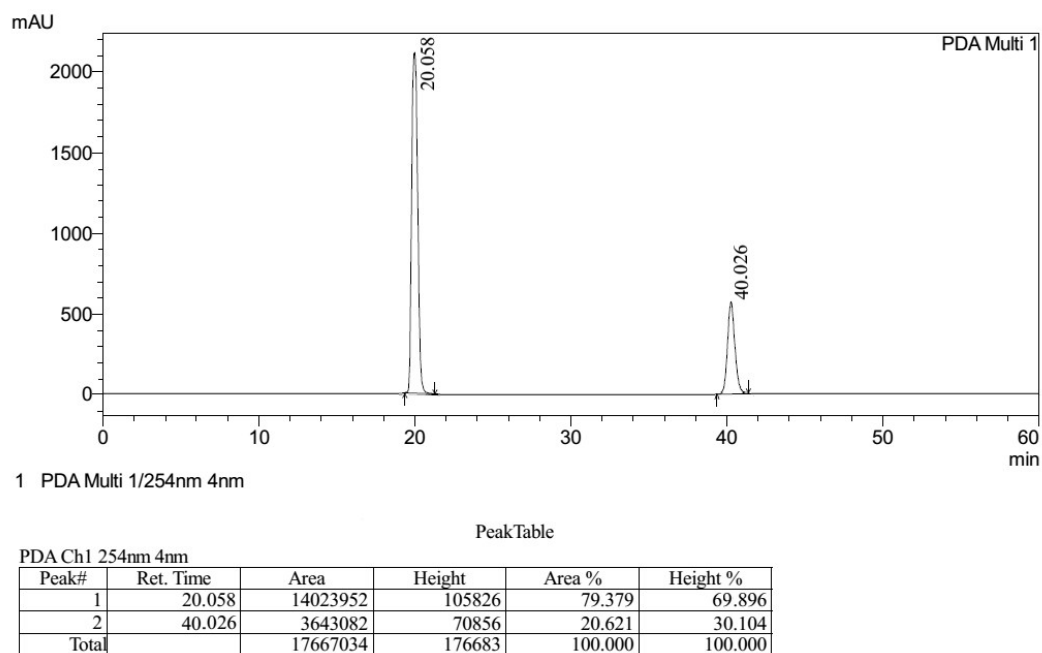

**Figure S61:** HPLC chromatogram of (4a) in the presence 2 mol % of organocatalyst (12b) and TBHP/Ethanol in room temperature condition.

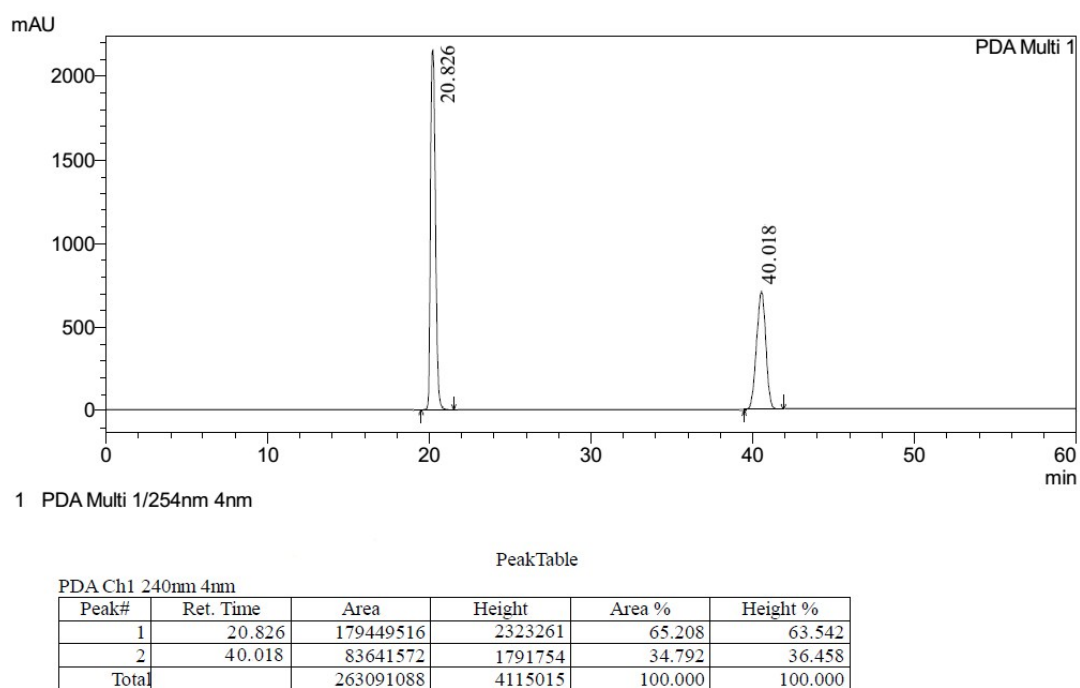

**Figure S62:** HPLC chromatogram of (4a) in the presence 2 mol % of organocatalyst (12a) and TBHP/1-butanol in room temperature condition.

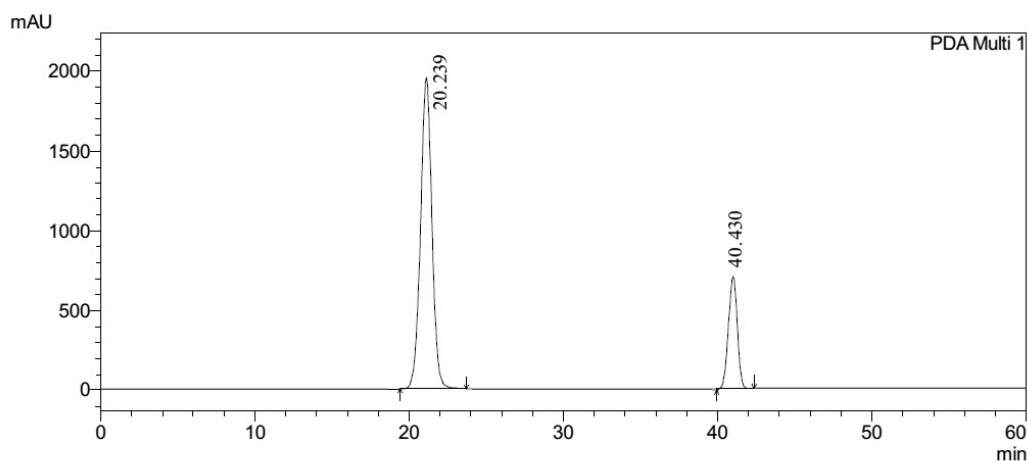

PeakTable

| Peak# | Ret. Time | Area     | Height | Area %  | Height % |
|-------|-----------|----------|--------|---------|----------|
| 1     | 20.239    | 16023952 | 101826 | 70.379  | 59.796   |
| 2     | 40.430    | 13643082 | 70856  | 29.621  | 40.204   |
| Total |           | 19667034 | 172683 | 100.000 | 100.000  |

**Figure S63:** HPLC chromatogram of **(4a)** in the presence 2 mol % of organocatalyst **(12b)** and TBHP/**1-butanol** in room temperature condition.

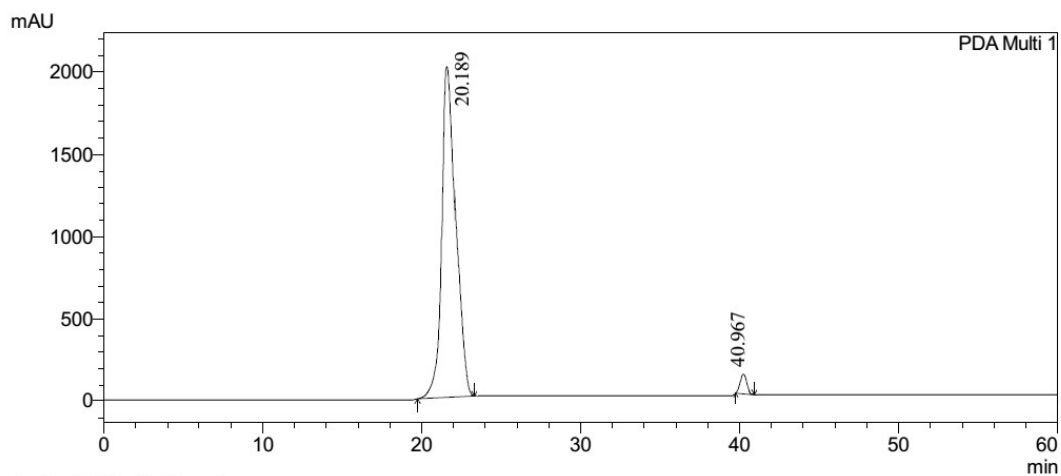

PeakTable

| Peak# | Ret. Time | Area     | Height  | Area %  | Height % |
|-------|-----------|----------|---------|---------|----------|
| 1     | 20.189    | 59989641 | 2024905 | 97.580  | 95.203   |
| 2     | 40.967    | 1487822  | 102027  | 2.420   | 4.797    |
| Total |           | 61477464 | 2126932 | 100.000 | 100.000  |

**Figure S64:** HPLC chromatogram of **(4a)** in the presence 2 mol % of organocatalyst **(12a)** and TBHP/**Acetonitrile** in room temperature condition.

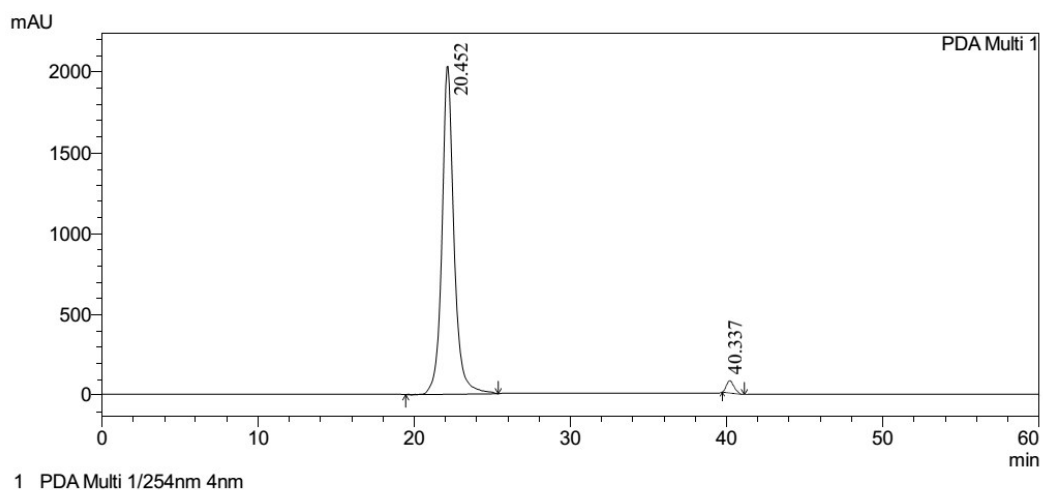

PeakTable

| PDA Ch1 254nm 4nm |           |           |        |         |          |
|-------------------|-----------|-----------|--------|---------|----------|
| Peak#             | Ret. Time | Area      | Height | Area %  | Height % |
| 1                 | 20.452    | 331381981 | 389212 | 99.687  | 98.851   |
| 2                 | 40.337    | 44433     | 4523   | 0.313   | 1.149    |
| Total             |           | 331426414 | 393735 | 100.000 | 100.000  |

**Figure S65:** HPLC chromatogram of (4a) in the presence 2 mol % of organocatalyst (12b) and TBHP/Acetonitrile in room temperature condition.

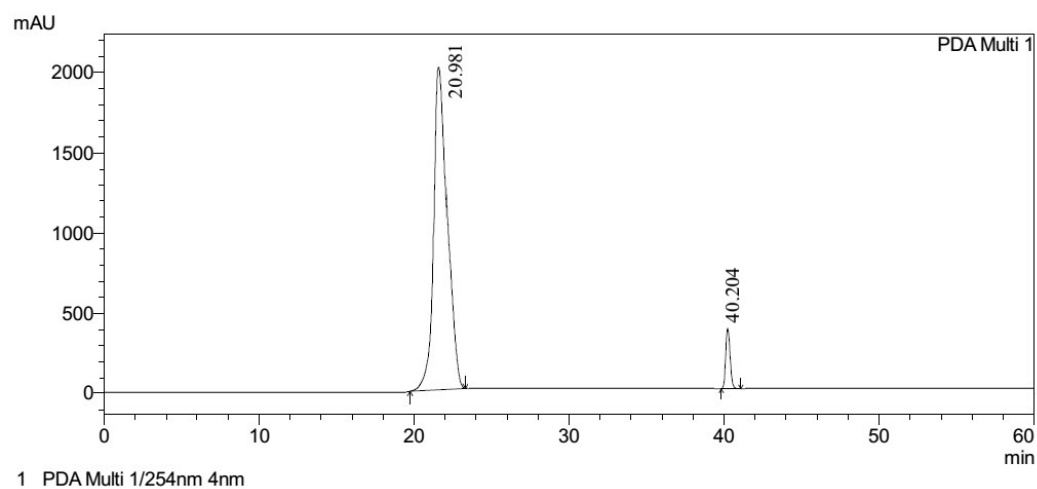

PeakTable

| PDA Ch1 254nm 4nm |           |          |        |         |          |
|-------------------|-----------|----------|--------|---------|----------|
| Peak#             | Ret. Time | Area     | Height | Area %  | Height % |
| 1                 | 20.981    | 27802899 | 398992 | 94.885  | 93.769   |
| 2                 | 40.204    | 1498877  | 26514  | 5.115   | 6.231    |
| Total             |           | 29301776 | 425507 | 100.000 | 100.000  |

**Figure S66:** HPLC chromatogram of (4a) in the presence 2 mol % of organocatalyst (12a) and TBHP/DMSO in room temperature condition.

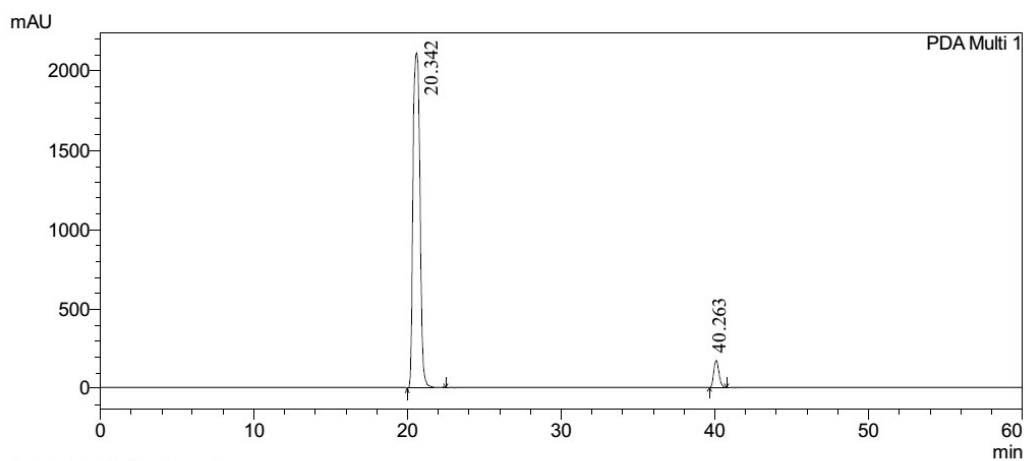

1 PDA Multi 1/254nm 4nm

PeakTable

PDA Ch1 254nm 4nm

| Peak# | Ret. Time | Area     | Height | Area %  | Height % |
|-------|-----------|----------|--------|---------|----------|
| 1     | 20.342    | 82677818 | 834234 | 96.067  | 92.270   |
| 2     | 40.263    | 3384812  | 69886  | 3.933   | 7.730    |
| Total |           | 86062630 | 904119 | 100.000 | 100.000  |

**Figure S67:** HPLC chromatogram of (4a) in the presence 2 mol % of organocatalyst (12b) and TBHP/DMSO in room temperature condition.

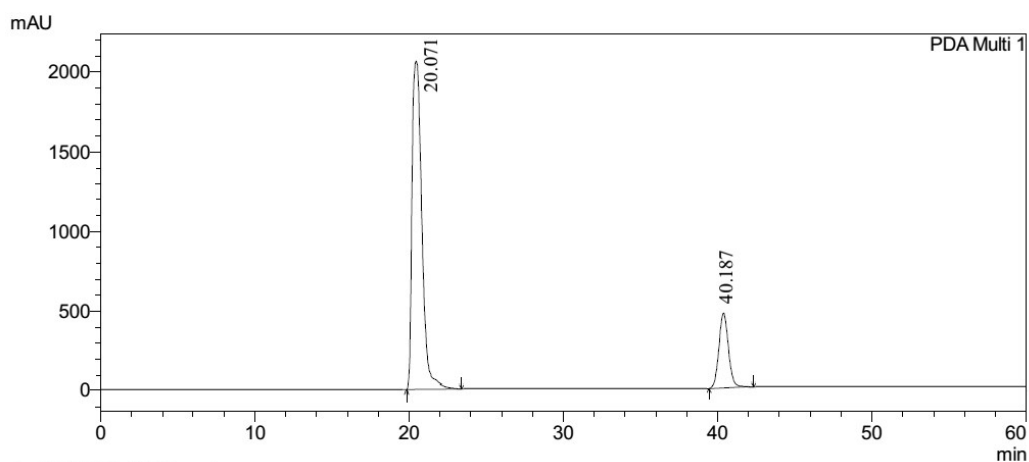

1 PDA Multi 1/254nm 4nm

PeakTable

PDA Ch1 254nm 4nm

| Peak# | Ret. Time | Area    | Height | Area %  | Height % |
|-------|-----------|---------|--------|---------|----------|
| 1     | 20.071    | 6412071 | 85516  | 89.674  | 73.910   |
| 2     | 40.187    | 738383  | 30187  | 10.326  | 26.090   |
| Total |           | 7150455 | 115703 | 100.000 | 100.000  |

**Figure S68:** HPLC chromatogram of (4a) in the presence 2 mol % of organocatalyst (12a) and TBHP/THF in room temperature condition.

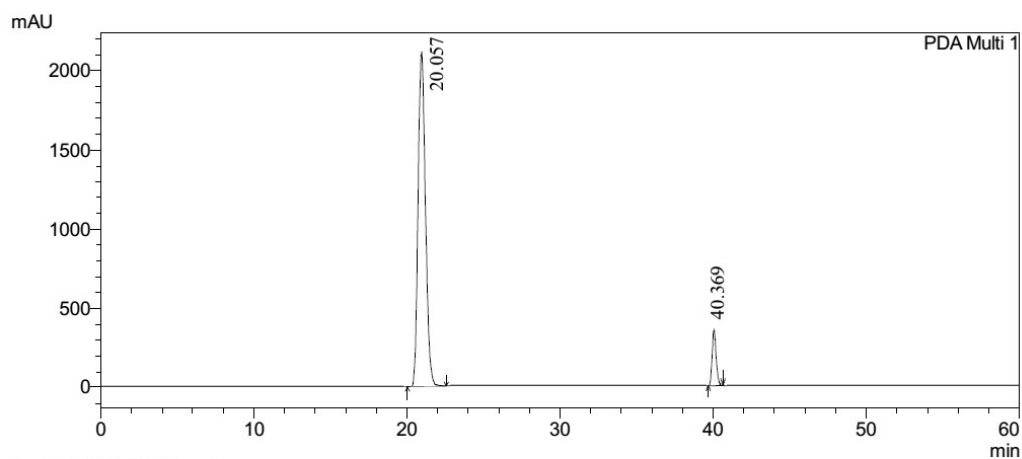

| PeakTable         |           |          |        |         |          |
|-------------------|-----------|----------|--------|---------|----------|
| PDA Ch1 254nm 4nm |           |          |        |         |          |
| Peak#             | Ret. Time | Area     | Height | Area %  | Height % |
| 1                 | 20.057    | 16288090 | 453694 | 93.044  | 88.009   |
| 2                 | 40.369    | 1217689  | 61815  | 6.956   | 11.991   |
| Total             |           | 17505779 | 515509 | 100.000 | 100.000  |

**Figure S69:** HPLC chromatogram of (**4a**) in the presence 2 mol % of organocatalyst (**12b**) and TBHP/THF in room temperature condition.

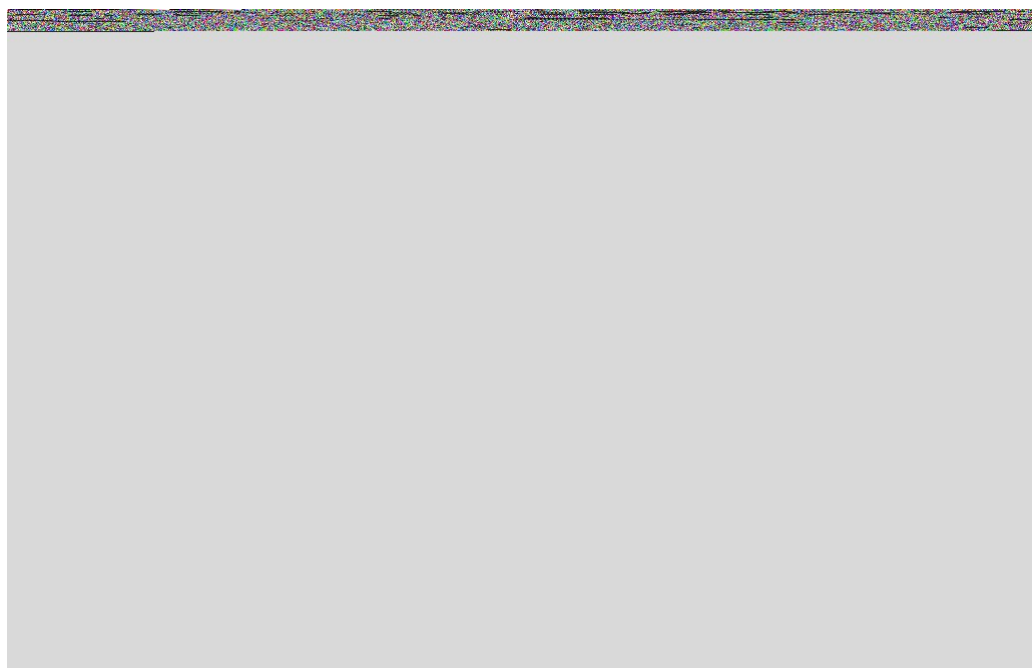

**Figure S70:** HPLC chromatogram of (**4a**) in the presence 2 mol % of organocatalyst (**12b**) and H<sub>2</sub>O<sub>2</sub>/TEA/Acetonitrile in room temperature condition.

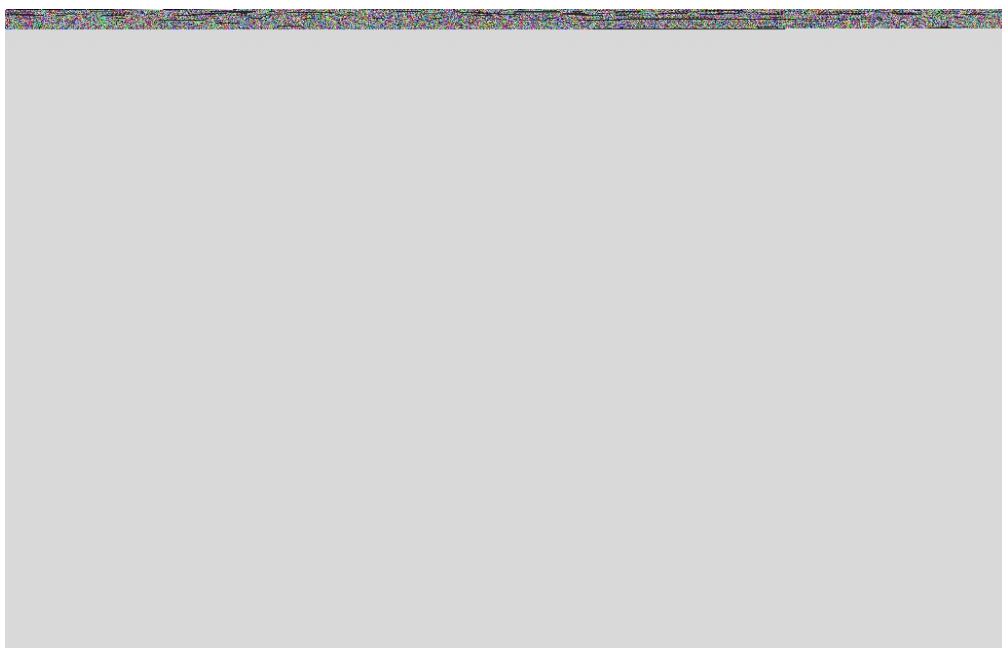

**Figure S71:** HPLC chromatogram of **(4a)** in the presence 2 mol % of organocatalyst **(12b)** and **H<sub>2</sub>O<sub>2</sub>/without base/Acetonitrile** in room temperature condition.

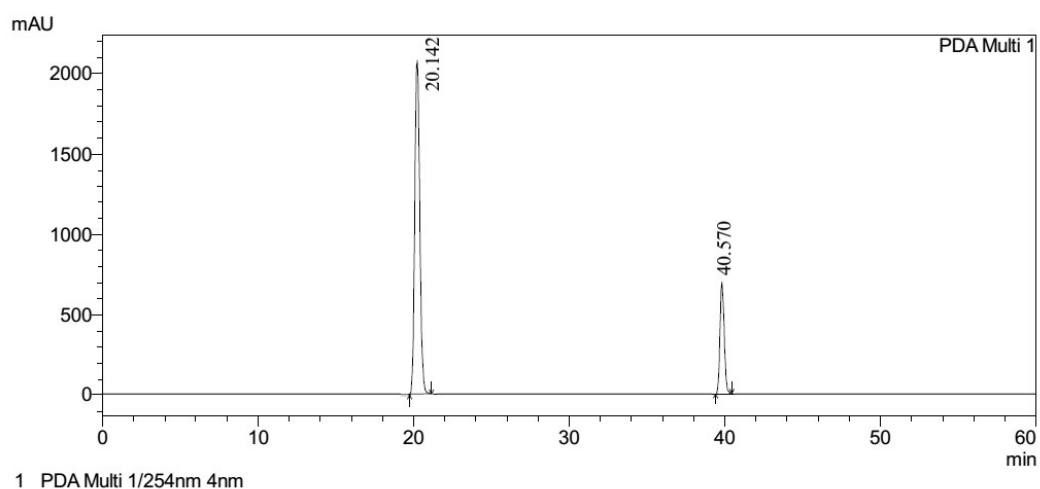

1 PDA Multi 1/254nm 4nm

PeakTable

| Peak# | Ret. Time | Area     | Height | Area %  | Height % |
|-------|-----------|----------|--------|---------|----------|
| 1     | 20.142    | 9227796  | 104252 | 79.483  | 73.552   |
| 2     | 40.570    | 2042474  | 36487  | 17.517  | 26.448   |
| Total |           | 11370271 | 141740 | 100.000 | 100.000  |

**Figure S72:** HPLC chromatogram of **(4a)** in the presence 2 mol % of organocatalyst **(12b)** and **TBHP/TEA/Acetonitrile** in room temperature condition.

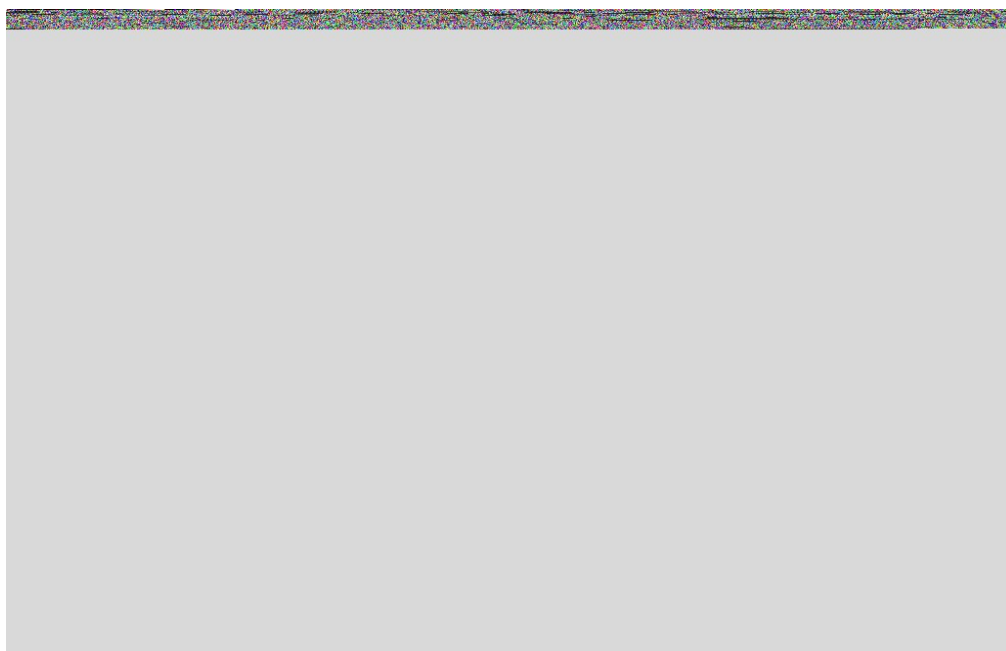

**Figure S73:** HPLC chromatogram of **(4a)** in the presence 2 mol % of organocatalyst **(12b)** and **TBHP/Pyridine/Acetonitrile** in room temperature condition.

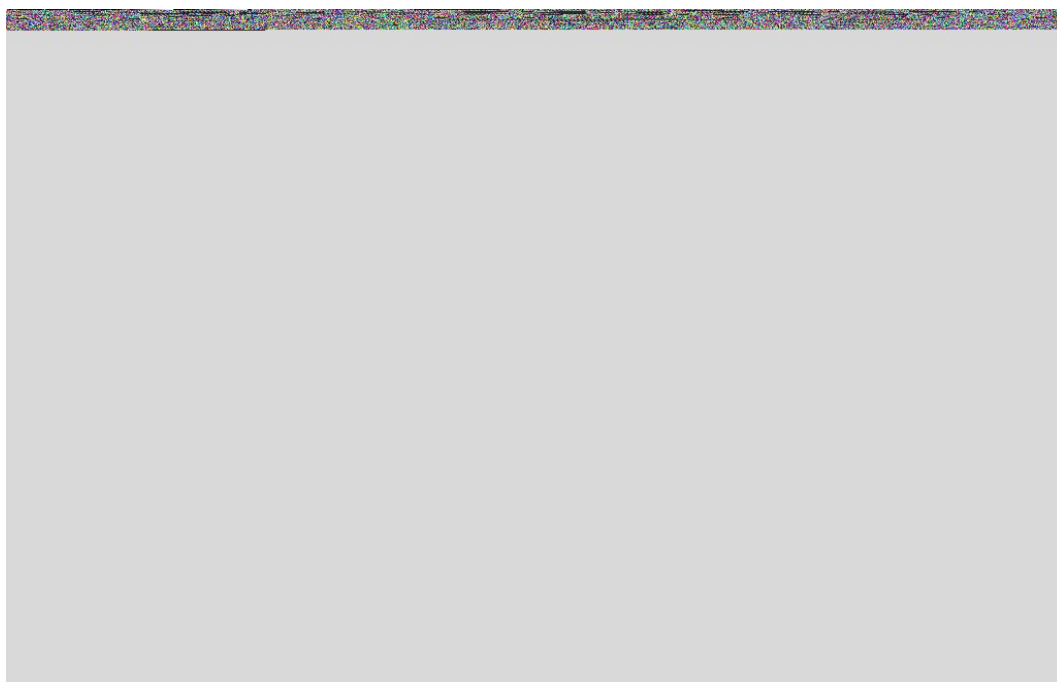

**Figure S74:** HPLC chromatogram of **(4a)** in the presence 2 mol % of organocatalyst **(12b)** and **TBHP/without base/Acetonitrile** in room temperature condition.

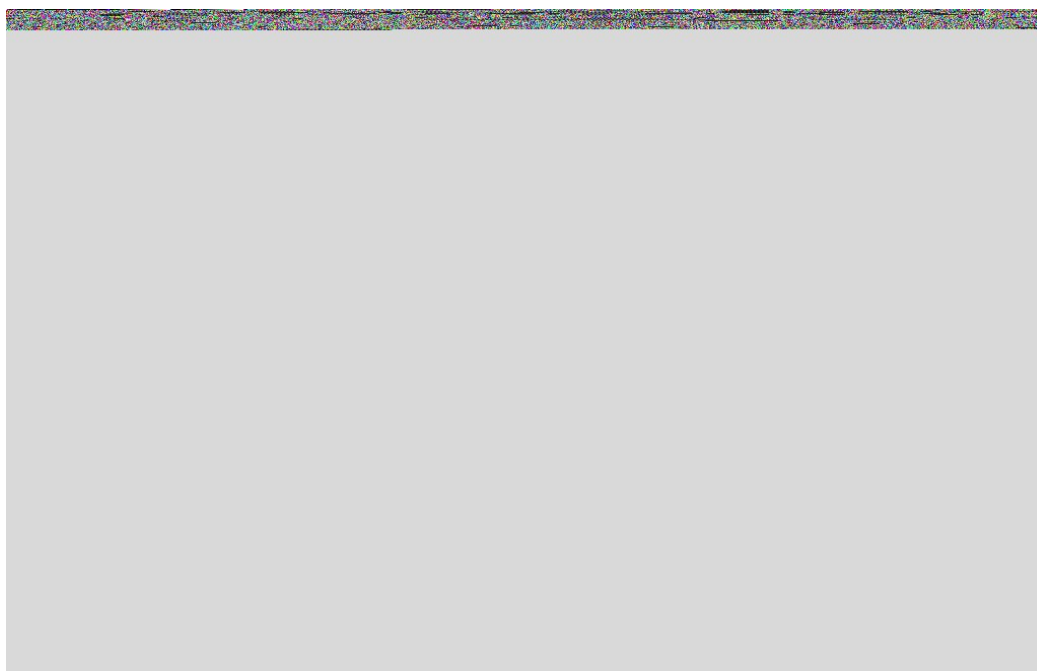

**Figure S75:** HPLC chromatogram of (4a) in the presence **2 mol %** of organocatalyst (12b) and TBHP /Acetonitrile in **65 °C temperature** conditions.

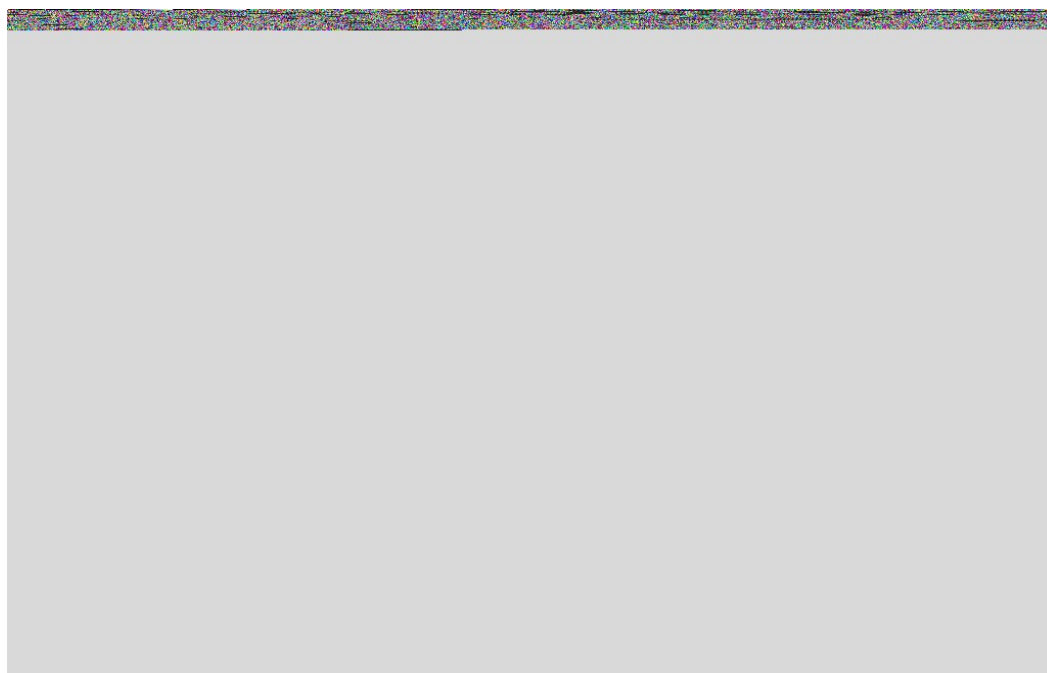

**Figure S76:** HPLC chromatogram of (4a) in the presence **5 mol %** of organocatalyst (12b) and TBHP /Acetonitrile in **65 °C temperature** conditions.

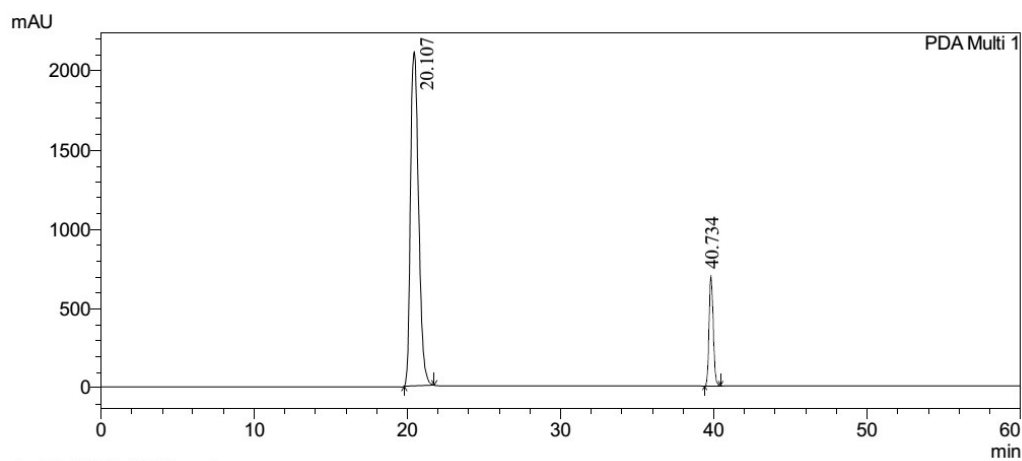

1 PDA Multi 1/254nm 4nm

| PeakTable         |           |          |        |         |          |
|-------------------|-----------|----------|--------|---------|----------|
| PDA Ch1 254nm 4nm |           |          |        |         |          |
| Peak#             | Ret. Time | Area     | Height | Area %  | Height % |
| 1                 | 20.107    | 8473498  | 108659 | 83.721  | 74.717   |
| 2                 | 40.734    | 1647576  | 36770  | 16.279  | 25.283   |
| Total             |           | 10121074 | 145429 | 100.000 | 100.000  |

**Figure S77:** HPLC chromatogram of (**4a**) in the presence **15 mol %** of organocatalyst (**12b**) and TBHP /Acetonitrile in **65 °C temperature** conditions.

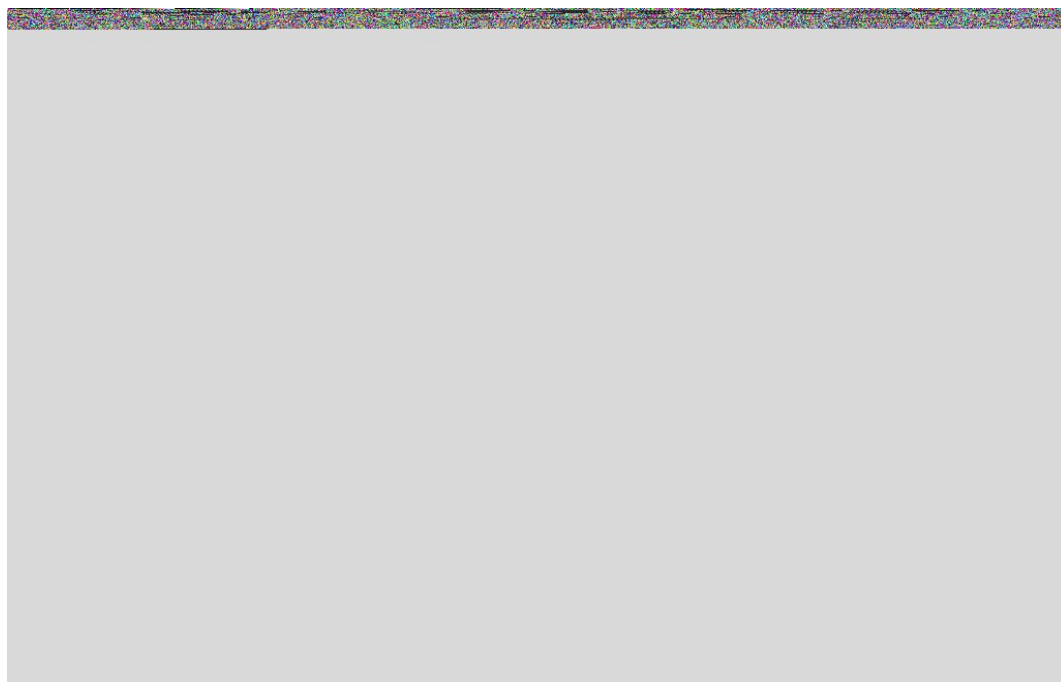

**Figure S78:** HPLC chromatogram of (**4a**) in the presence **2 mol %** of organocatalyst (**12b**) and TBHP /Acetonitrile in **30 °C temperature (RT)** conditions.

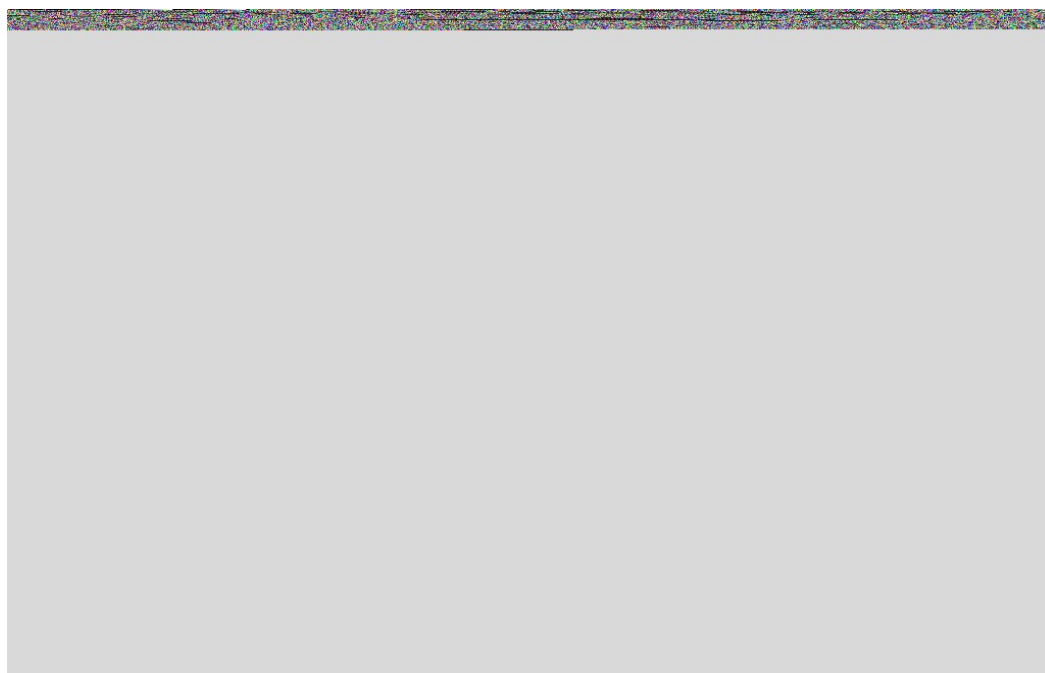

**Figure S79:** HPLC chromatogram of (4a) in the presence **5 mol %** of organocatalyst (12b) and TBHP /Acetonitrile in **30 °C temperature (RT)** conditions.

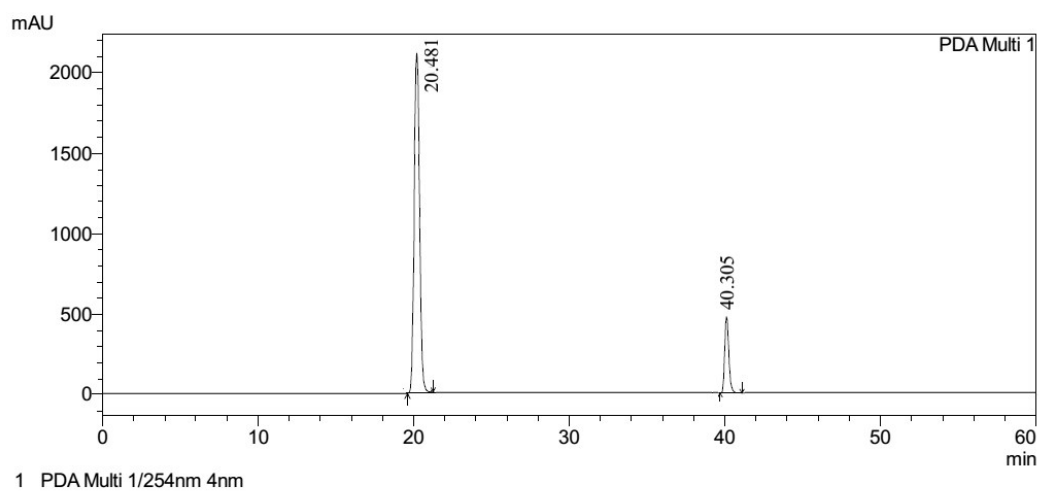

PeakTable

| PDA Ch1 254nm 4nm |           |          |         |         |          |
|-------------------|-----------|----------|---------|---------|----------|
| Peak#             | Ret. Time | Area     | Height  | Area %  | Height % |
| 1                 | 20.481    | 62187860 | 2088838 | 89.957  | 84.178   |
| 2                 | 40.305    | 6943057  | 392620  | 10.043  | 15.822   |
| Total             |           | 69130916 | 2481458 | 100.000 | 100.000  |

**Figure S80:** HPLC chromatogram of (4a) in the presence **15 mol %** of organocatalyst (12b) and TBHP /Acetonitrile in **30 °C temperature (RT)** conditions.

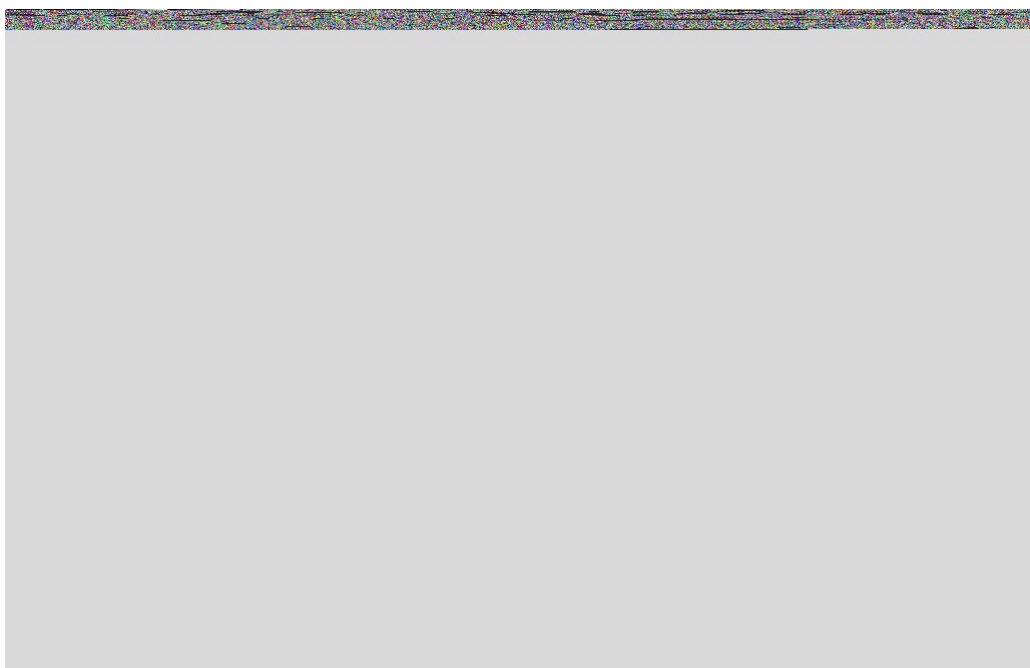

**Figure S81:** HPLC chromatogram of (4a) in the presence **2 mol %** of organocatalyst (12b) and TBHP /Acetonitrile in **0 °C temperature** conditions.

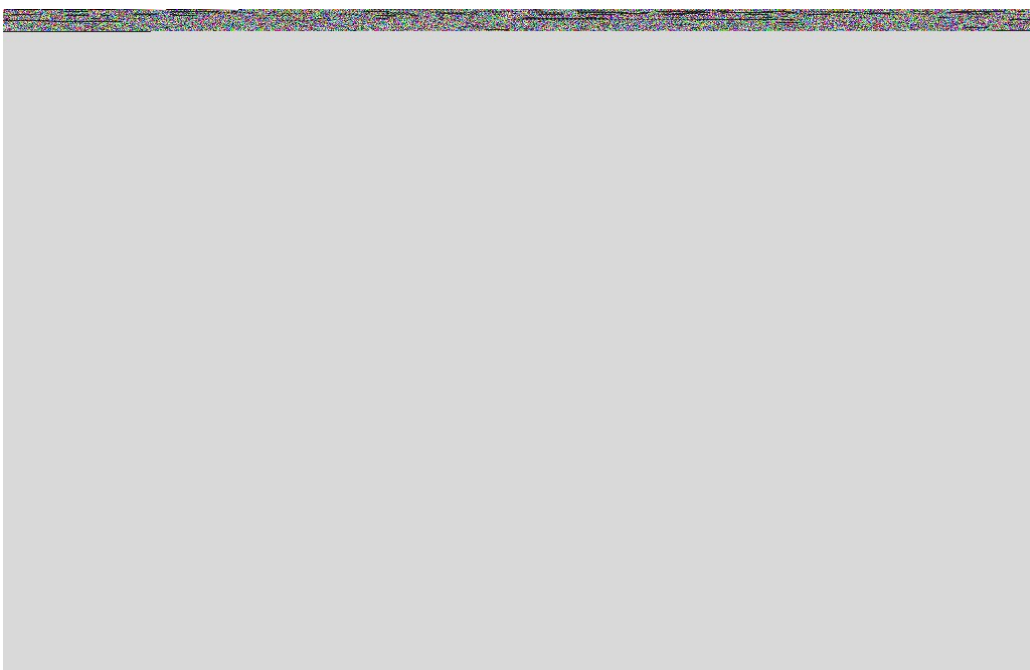

**Figure S82:** HPLC chromatogram of (4a) in the presence **5 mol %** of organocatalyst (12b) and TBHP /Acetonitrile in **0 °C temperature** conditions.

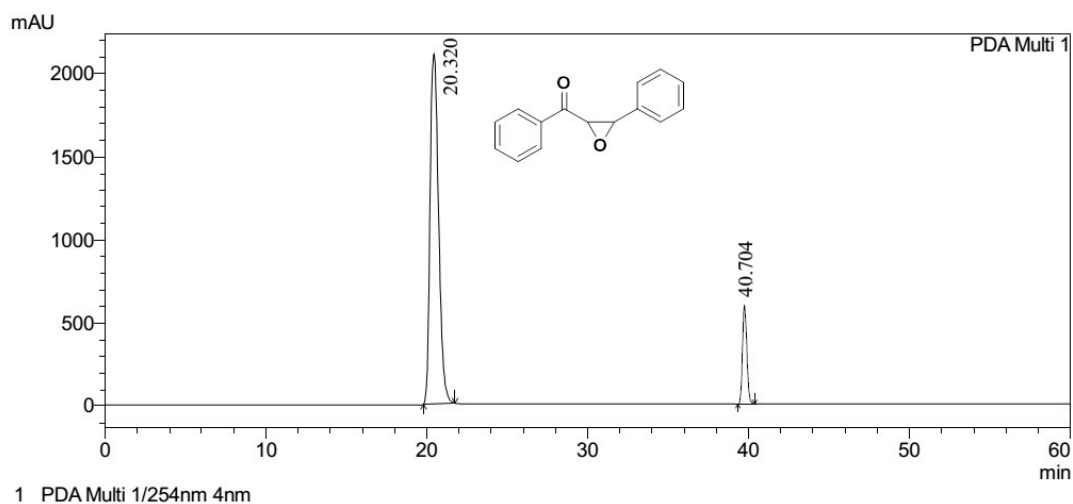

**Figure S83:** HPLC chromatogram of (4a) in the presence 2 mol % of **C<sub>2</sub>-symmetric** organocatalyst (**12c**) and TBHP/acetonitrile in room temperature condition.

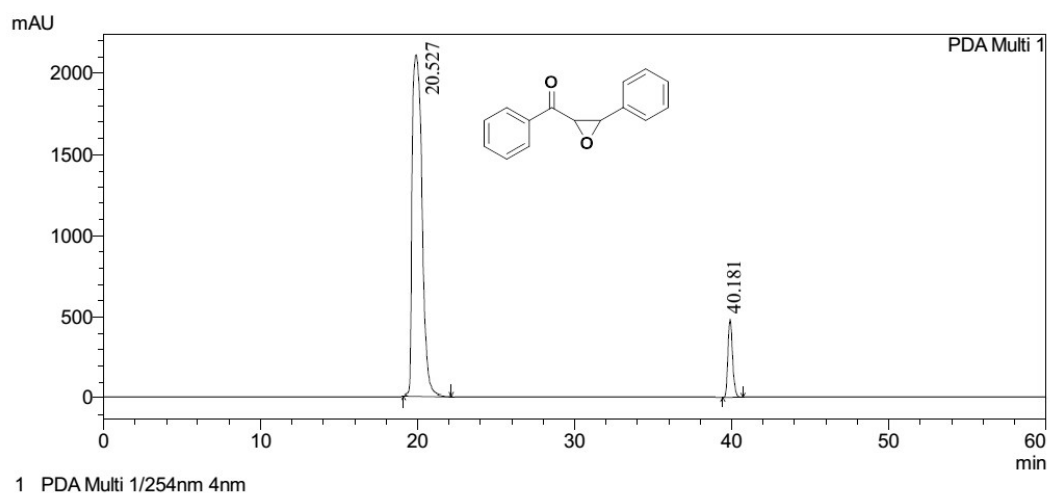

**Figure S84:** HPLC chromatogram of (4a) in the presence 2 mol % of **C<sub>1</sub>-symmetric** organocatalyst (**12d**) and TBHP/acetonitrile in room temperature condition.

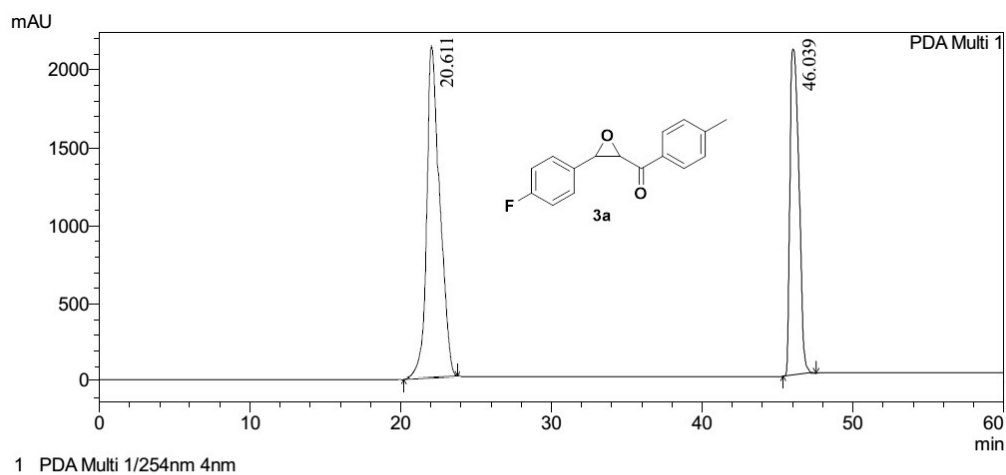

PeakTable

| Peak# | Ret. Time | Area    | Height | Area %  | Height % |
|-------|-----------|---------|--------|---------|----------|
| 1     | 20.611    | 2753234 | 112968 | 50.961  | 51.633   |
| 2     | 46.039    | 2615892 | 111219 | 49.039  | 48.367   |
| Total |           | 5369127 | 224187 | 100.000 | 100.000  |

**Figure S85:** HPLC chromatogram of **(3a)** Racemic mixture.

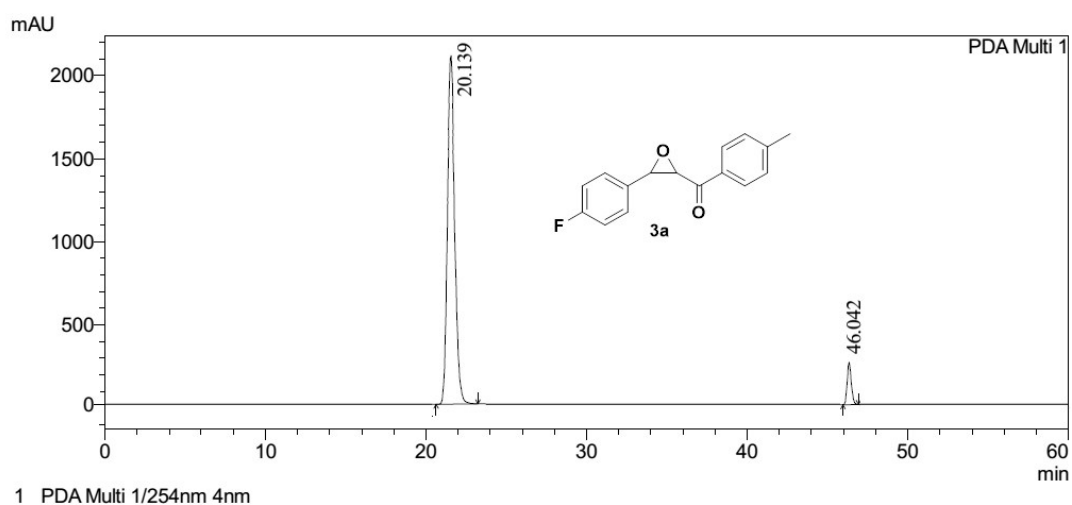

PeakTable

| Peak# | Ret. Time | Area     | Height  | Area %  | Height % |
|-------|-----------|----------|---------|---------|----------|
| 1     | 20.139    | 63163666 | 2142740 | 94.133  | 90.976   |
| 2     | 46.042    | 3936965  | 212532  | 5.867   | 9.024    |
| Total |           | 67100631 | 2355272 | 100.000 | 100.000  |

**Figure S86:** HPLC chromatogram of **(3a)** in the presence 2 mol % of organocatalyst **(12a)** and TBHP/acetonitrile in room temperature condition.

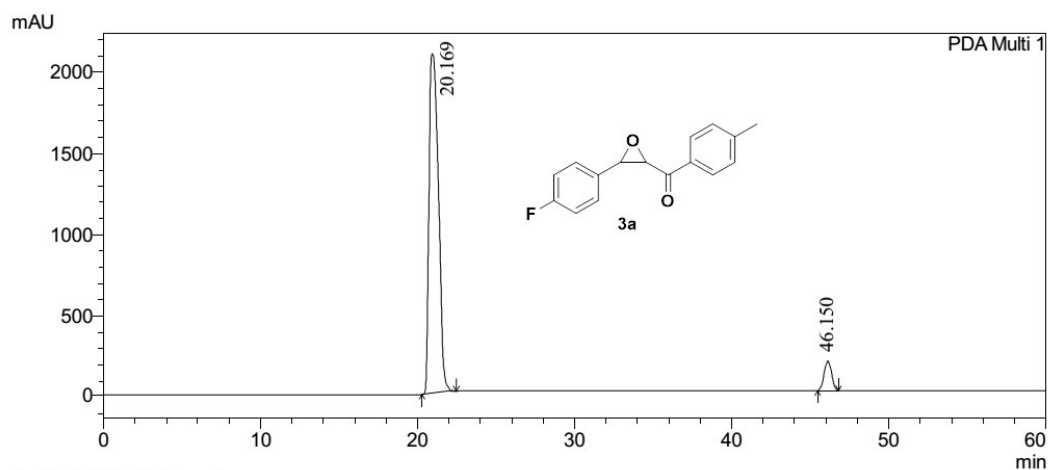

PeakTable

| PDA Ch1 254nm 4nm |           |          |        |         |          |
|-------------------|-----------|----------|--------|---------|----------|
| Peak#             | Ret. Time | Area     | Height | Area %  | Height % |
| 1                 | 20.169    | 61357098 | 746211 | 97.057  | 93.606   |
| 2                 | 46.150    | 61860393 | 50970  | 2.943   | 6.394    |
| Total             |           | 63217491 | 797180 | 100.000 | 100.000  |

**Figure S87:** HPLC chromatogram of (**3a**) in the presence 2 mol % of organocatalyst (**12b**) and TBHP/acetonitrile in room temperature condition.

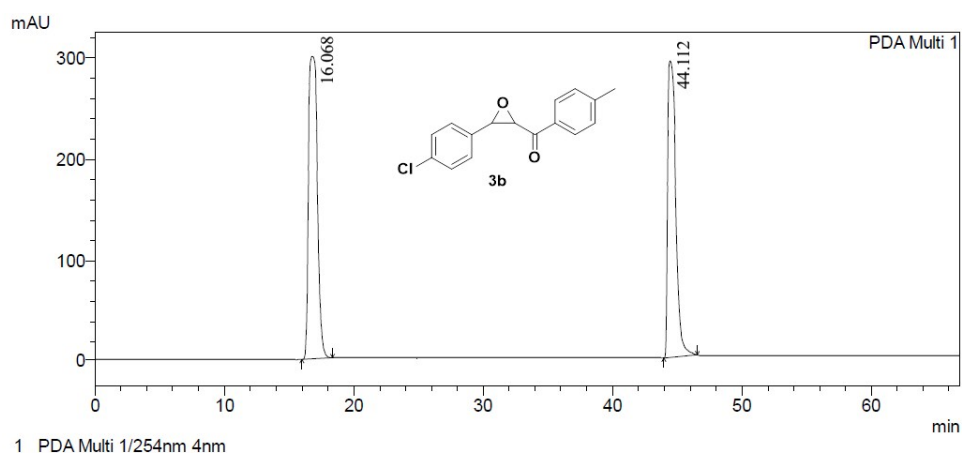

PeakTable

| PDA Ch1 254nm 4nm |           |          |        |         |          |
|-------------------|-----------|----------|--------|---------|----------|
| Peak#             | Ret. Time | Area     | Height | Area %  | Height % |
| 1                 | 16.068    | 9427796  | 104252 | 50.483  | 51.552   |
| 2                 | 44.112    | 9342474  | 97487  | 49.517  | 48.448   |
| Total             |           | 18770271 | 201740 | 100.000 | 100.000  |

**Figure S88:** HPLC chromatogram of (**3b**) Racemic mixture.

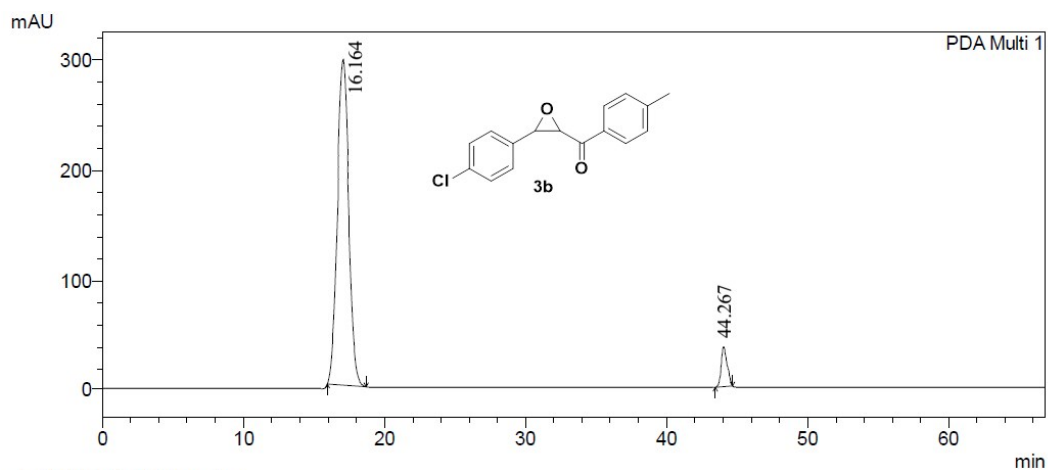

PeakTable

PDA Ch1 254nm 4nm

| Peak# | Ret. Time | Area     | Height | Area %  | Height % |
|-------|-----------|----------|--------|---------|----------|
| 1     | 16.164    | 36665482 | 376897 | 93.816  | 85.381   |
| 2     | 44.267    | 2416824  | 64531  | 6.184   | 14.619   |
| Total |           | 39082306 | 441428 | 100.000 | 100.000  |

**Figure S89:** HPLC chromatogram of (**3b**) in the presence 2 mol % of organocatalyst (**12a**) and TBHP/acetonitrile in room temperature condition.

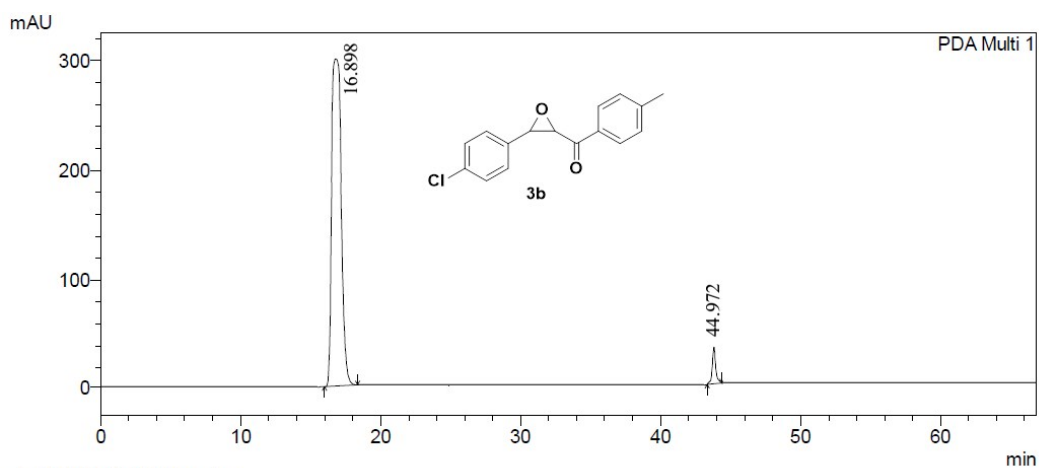

PeakTable

PDA Ch1 254nm 4nm

| Peak# | Ret. Time | Area     | Height | Area %  | Height % |
|-------|-----------|----------|--------|---------|----------|
| 1     | 16.898    | 56742198 | 813778 | 97.469  | 97.488   |
| 2     | 44.972    | 4621317  | 20965  | 2.531   | 2.512    |
| Total |           | 61363515 | 834744 | 100.000 | 100.000  |

**Figure S90:** HPLC chromatogram of (**3b**) in the presence 2 mol % of organocatalyst (**12b**) and TBHP/acetonitrile in room temperature condition.

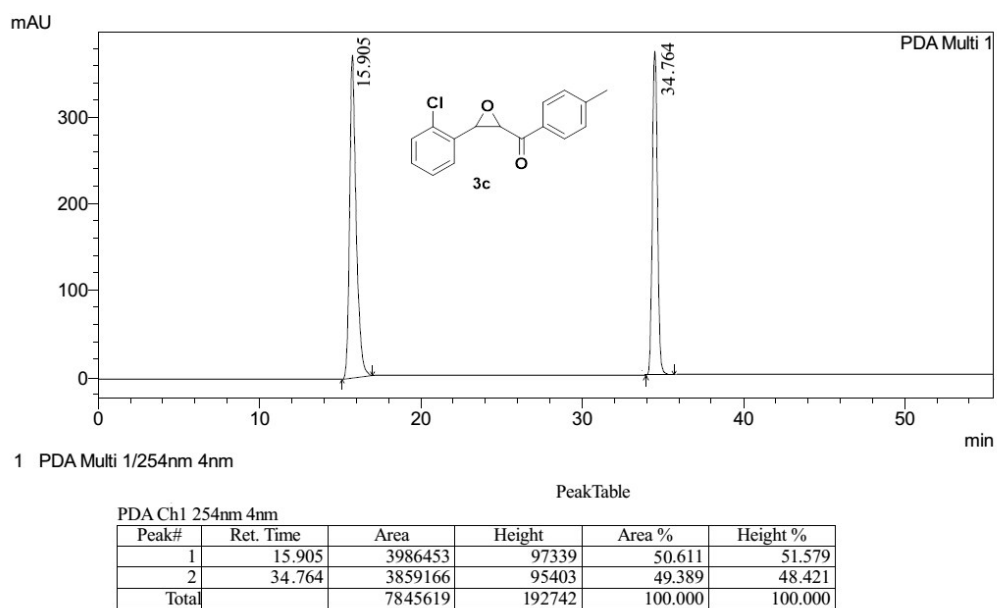

**Figure S91:** HPLC chromatogram of (3c) Racemic mixture.

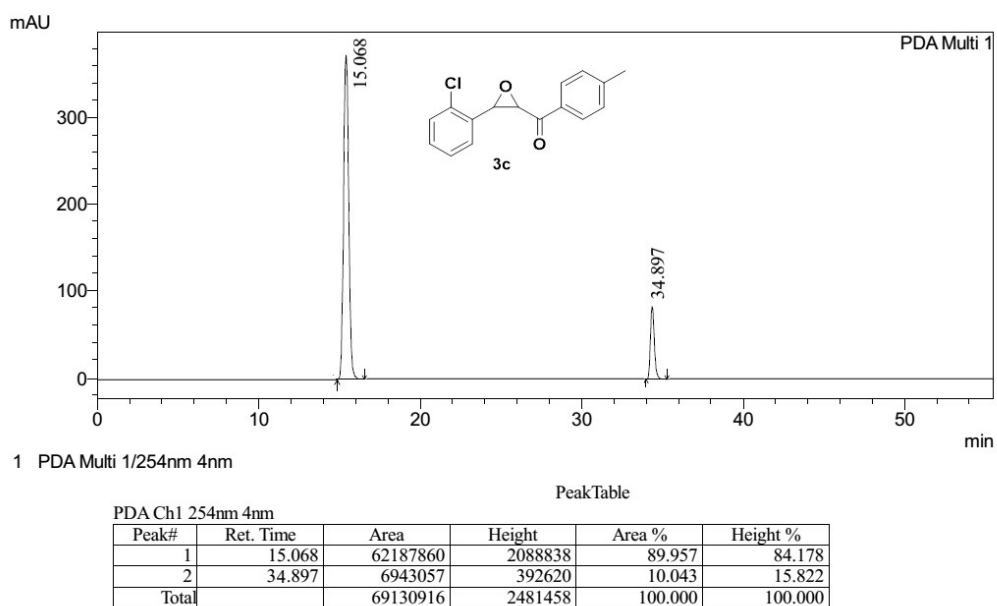

**Figure S92:** HPLC chromatogram of (3c) in the presence 2 mol % of organocatalyst (12a) and TBHP/acetonitrile in room temperature condition.

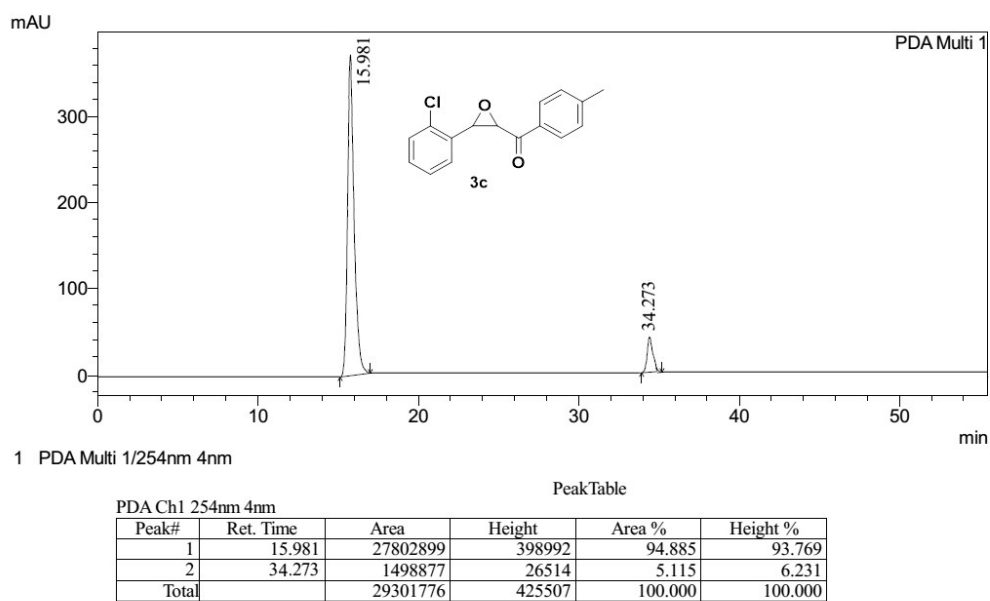

**Figure S93:** HPLC chromatogram of (**3c**) in the presence 2 mol % of organocatalyst (**12b**) and TBHP/acetonitrile in room temperature condition.

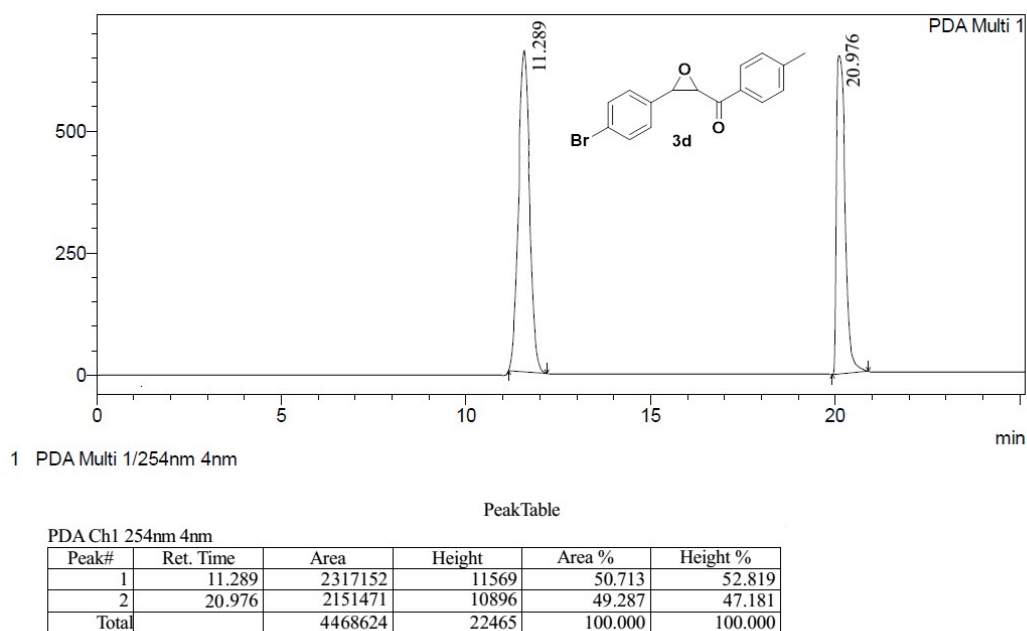

**Figure S94:** HPLC chromatogram of (**3d**) Racemic mixture.

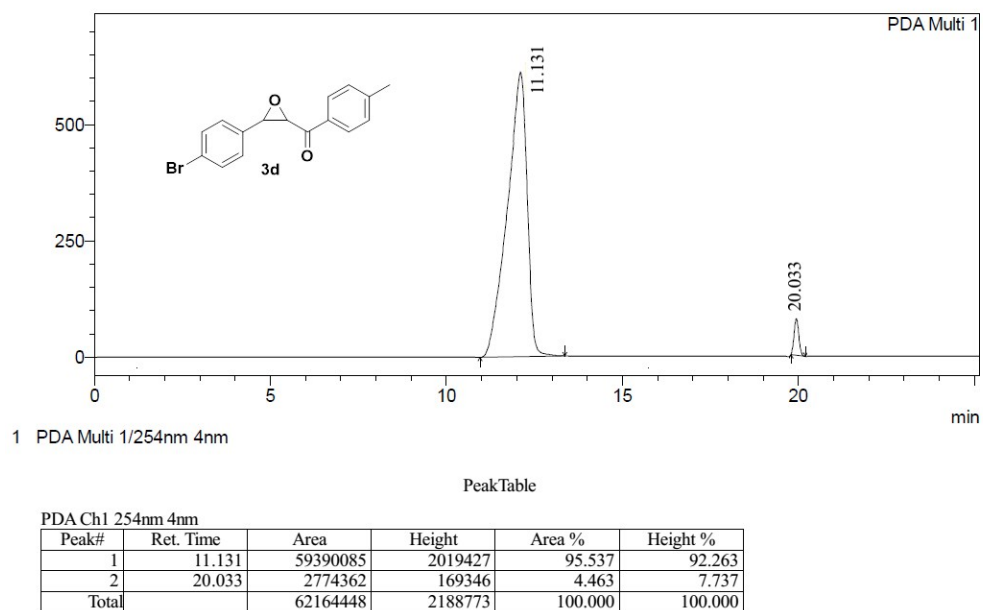

**Figure S95:** HPLC chromatogram of (**3d**) in the presence 2 mol % of organocatalyst (**12a**) and TBHP/acetonitrile in room temperature condition.

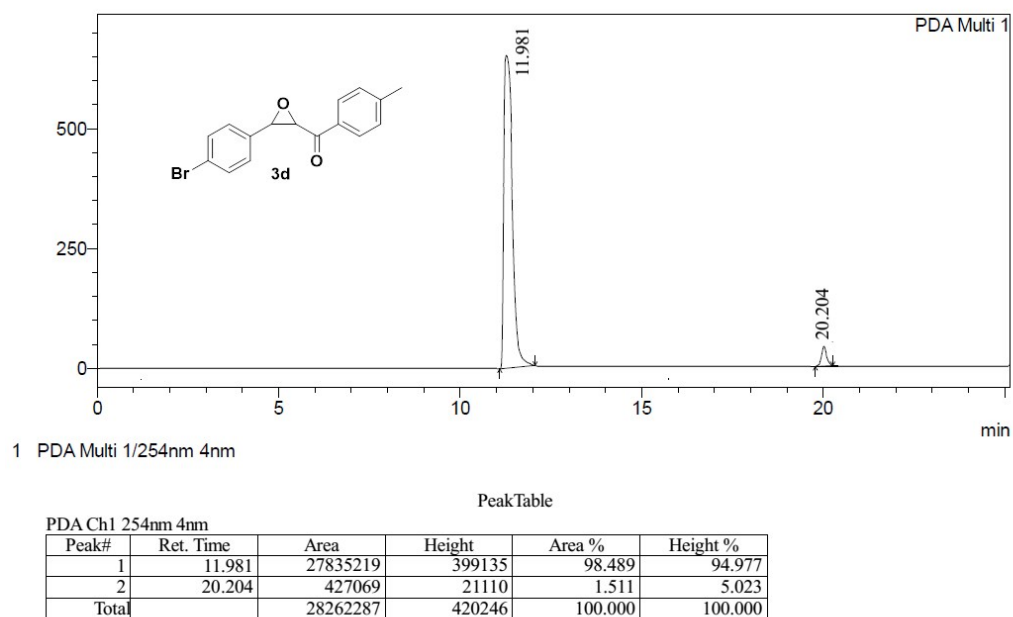

**Figure S96:** HPLC chromatogram of (**3d**) in the presence 2 mol % of organocatalyst (**12b**) and TBHP/acetonitrile in room temperature condition.

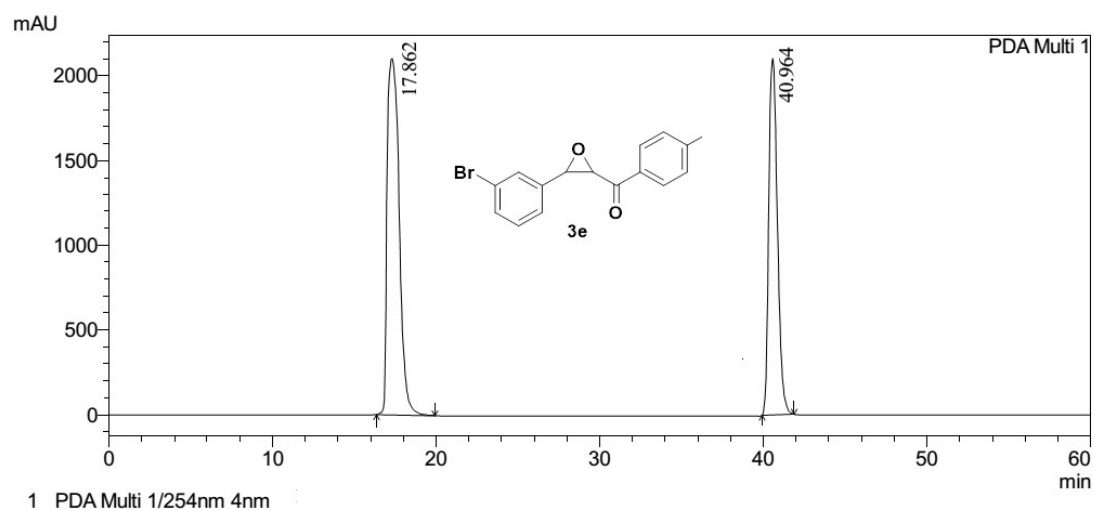

PeakTable

| Peak# | Ret. Time | Area      | Height  | Area %  | Height % |
|-------|-----------|-----------|---------|---------|----------|
| 1     | 17.862    | 143622513 | 1483220 | 50.741  | 51.794   |
| 2     | 40.964    | 142638897 | 1365126 | 49.259  | 48.206   |
| Total |           | 286261409 | 2848346 | 100.000 | 100.000  |

**Figure S97:** HPLC chromatogram of (3e) Racemic mixture.

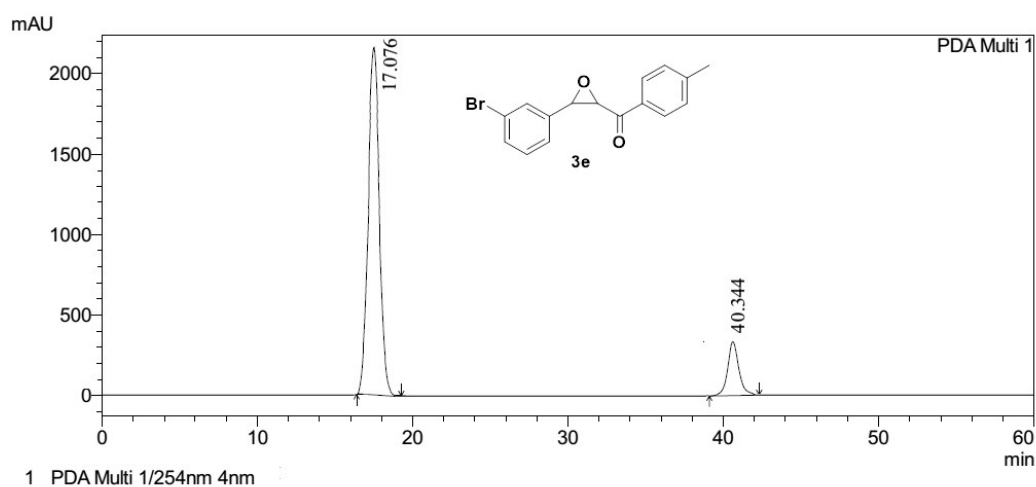

PeakTable

| Peak# | Ret. Time | Area     | Height  | Area %  | Height % |
|-------|-----------|----------|---------|---------|----------|
| 1     | 17.076    | 14690360 | 1273254 | 91.885  | 96.459   |
| 2     | 40.344    | 1297389  | 19932   | 8.115   | 3.541    |
| Total |           | 15987749 | 1293185 | 100.000 | 100.000  |

**Figure S98:** HPLC chromatogram of (3e) in the presence 2 mol % of organocatalyst (12a) and TBHP/acetonitrile in room temperature condition.

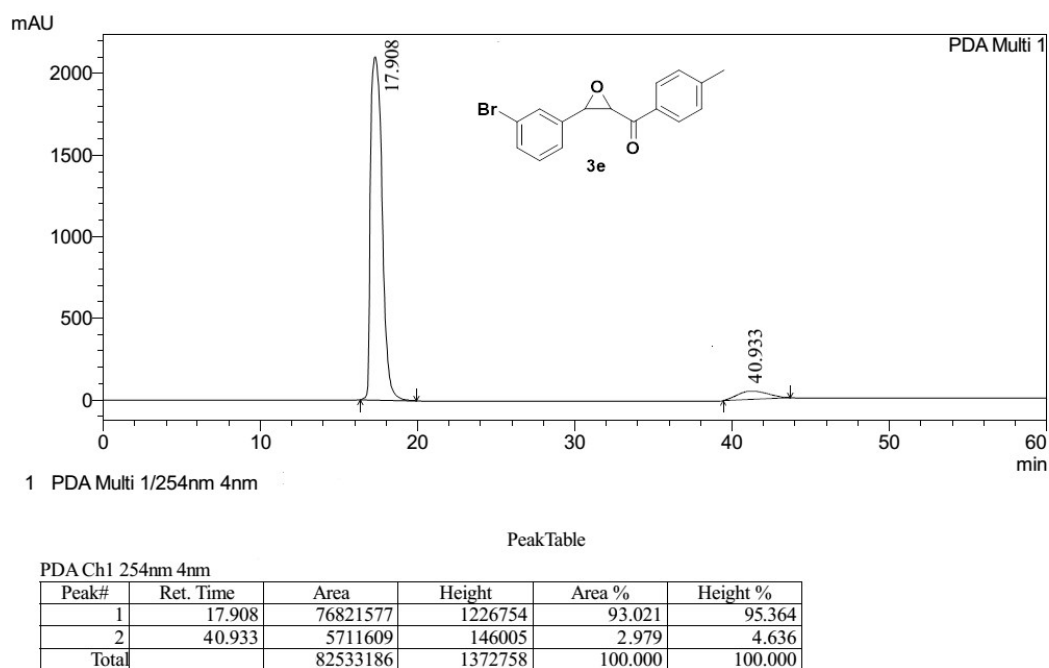

**Figure S99:** HPLC chromatogram of (**3e**) in the presence 2 mol % of organocatalyst (**12b**) and TBHP/acetonitrile in room temperature condition.

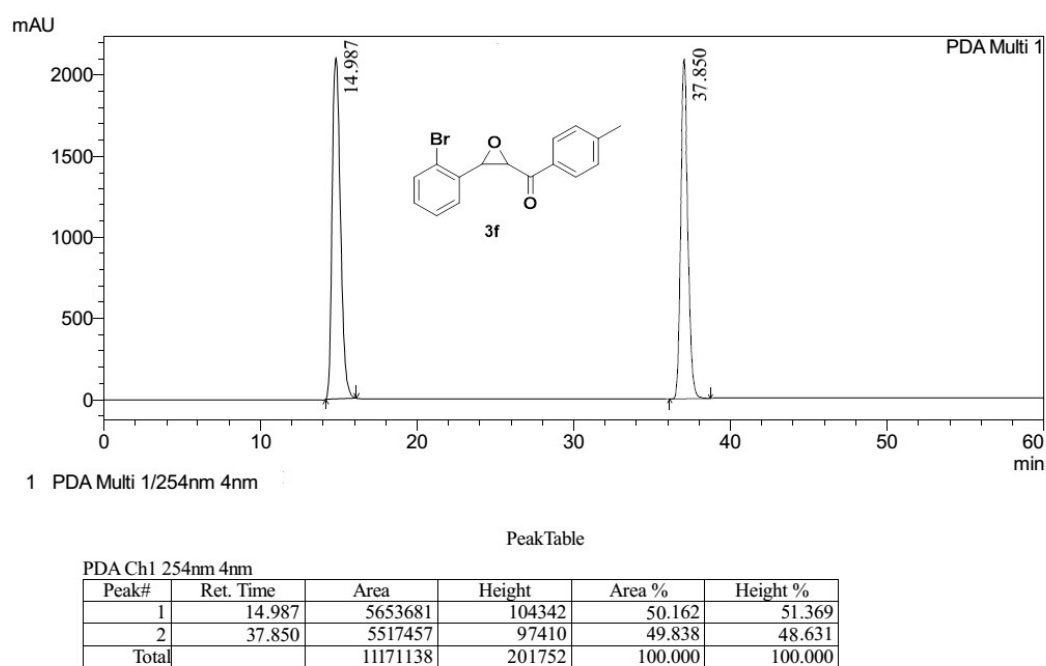

**Figure S100:** HPLC chromatogram of (**3f**) Racemic mixture.

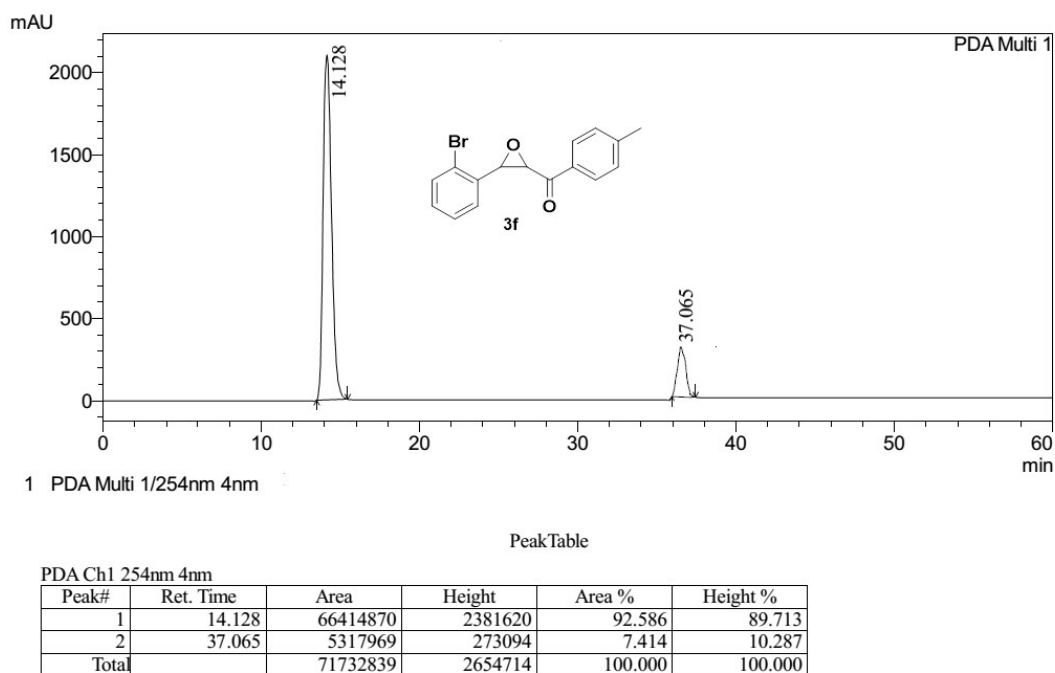

**Figure S101:** HPLC chromatogram of (**3f**) in the presence 2 mol % of organocatalyst (**12a**) and TBHP/acetonitrile in room temperature condition.

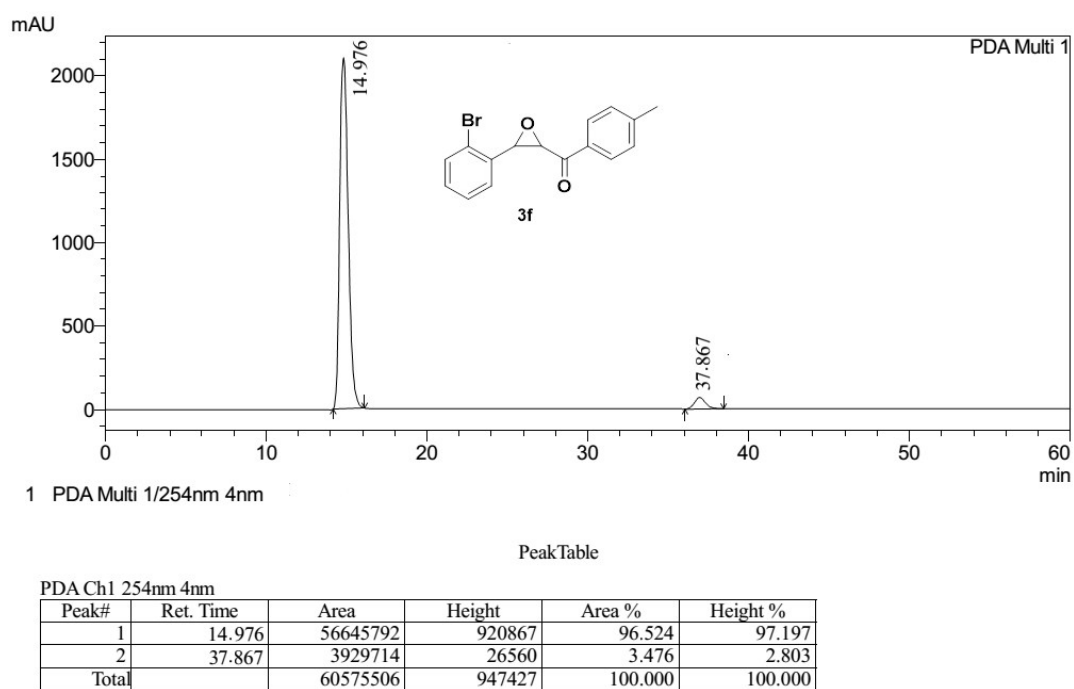

**Figure S102:** HPLC chromatogram of (**3f**) in the presence 2 mol % of organocatalyst (**12b**) and TBHP/acetonitrile in room temperature condition.

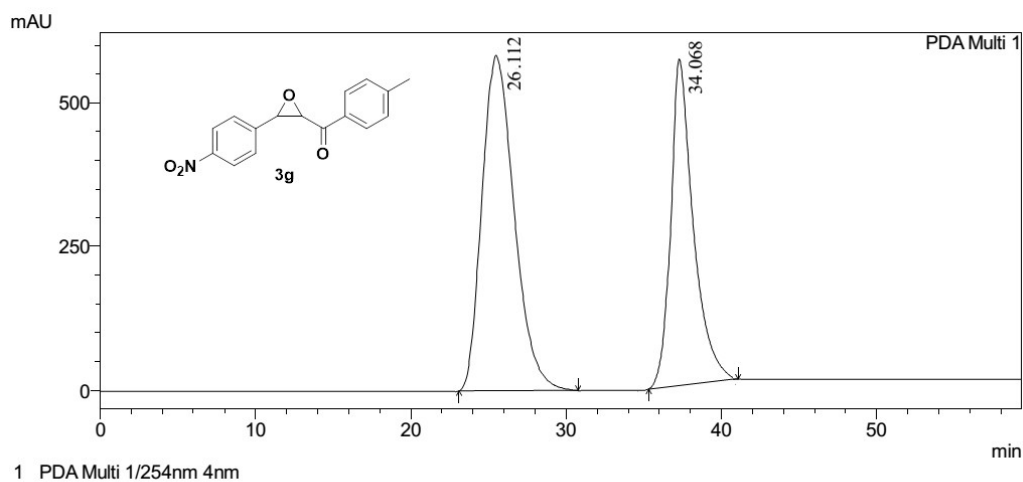

PeakTable

PDA Ch1 254nm 4nm

| Peak# | Ret. Time | Area     | Height | Area %  | Height % |
|-------|-----------|----------|--------|---------|----------|
| 1     | 26.112    | 9236738  | 103209 | 50.607  | 51.001   |
| 2     | 34.068    | 9187611  | 102591 | 49.393  | 48.999   |
| Total |           | 18424349 | 205800 | 100.000 | 100.000  |

**Figure S103:** HPLC chromatogram of **(3g)** Racemic mixture.

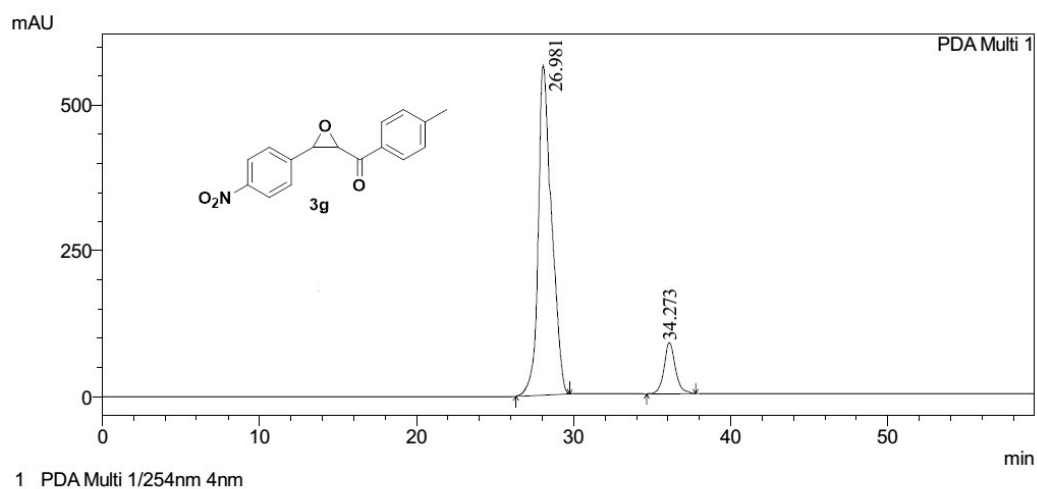

PeakTable

PDA Ch1 254nm 4nm

| Peak# | Ret. Time | Area     | Height | Area %  | Height % |
|-------|-----------|----------|--------|---------|----------|
| 1     | 26.981    | 27802899 | 398992 | 94.885  | 93.769   |
| 2     | 34.273    | 1498877  | 26514  | 5.115   | 6.231    |
| Total |           | 29301776 | 425507 | 100.000 | 100.000  |

**Figure S104:** HPLC chromatogram of **(3g)** in the presence 2 mol % of organocatalyst **(12a)** and TBHP/acetonitrile in room temperature condition.

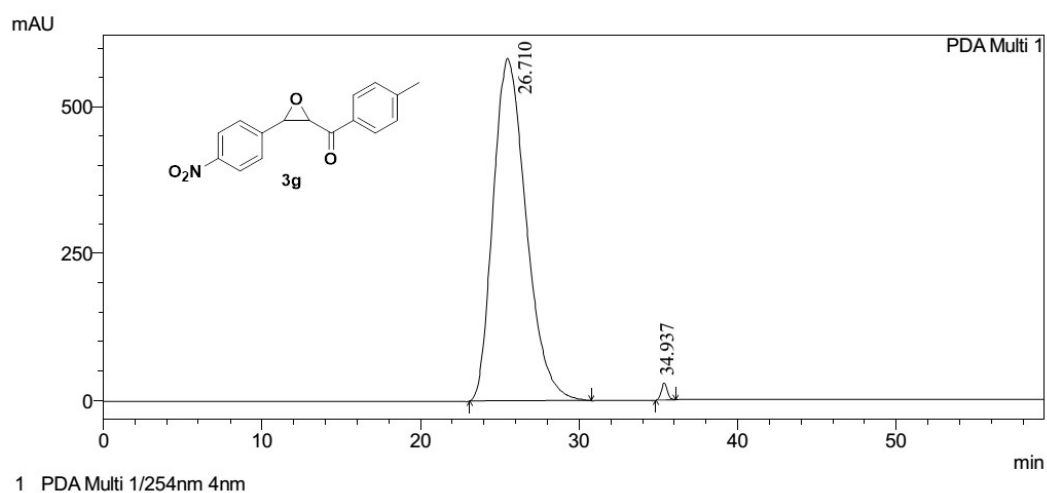

PeakTable

| Peak# | Ret. Time | Area     | Height | Area %  | Height % |
|-------|-----------|----------|--------|---------|----------|
| 1     | 26.710    | 72949890 | 507459 | 99.113  | 98.604   |
| 2     | 34.937    | 652804   | 7184   | 0.887   | 1.396    |
| Total |           | 73602695 | 514642 | 100.000 | 100.000  |

**Figure S105:** HPLC chromatogram of (**3g**) in the presence 2 mol % of organocatalyst (**12b**) and TBHP/acetonitrile in room temperature condition.

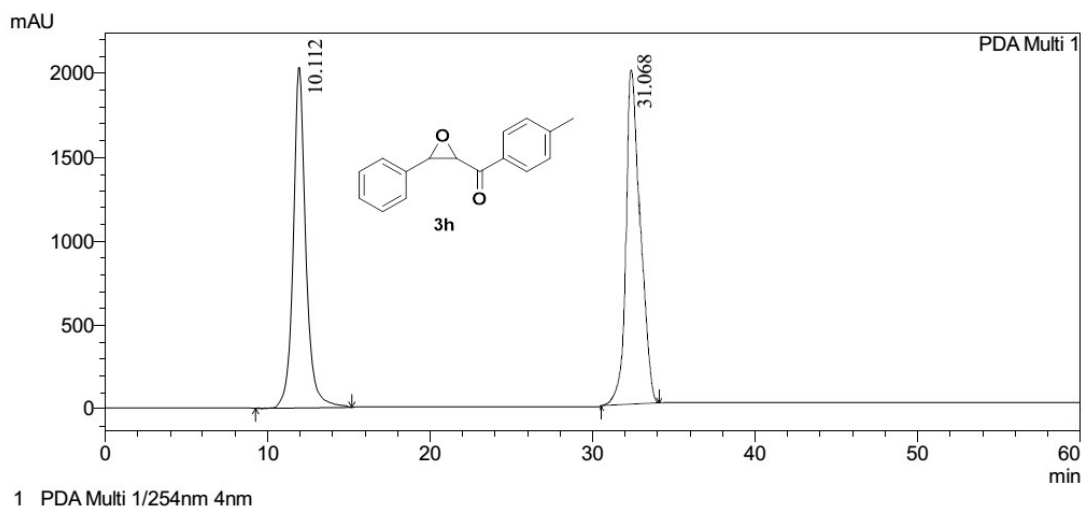

PeakTable

| Peak# | Ret. Time | Area     | Height | Area %  | Height % |
|-------|-----------|----------|--------|---------|----------|
| 1     | 10.112    | 9151863  | 102571 | 50.394  | 51.420   |
| 2     | 31.068    | 9065393  | 95256  | 49.606  | 48.580   |
| Total |           | 18217256 | 197826 | 100.000 | 100.000  |

**Figure S106:** HPLC chromatogram of (**3h**) Racemic mixture.

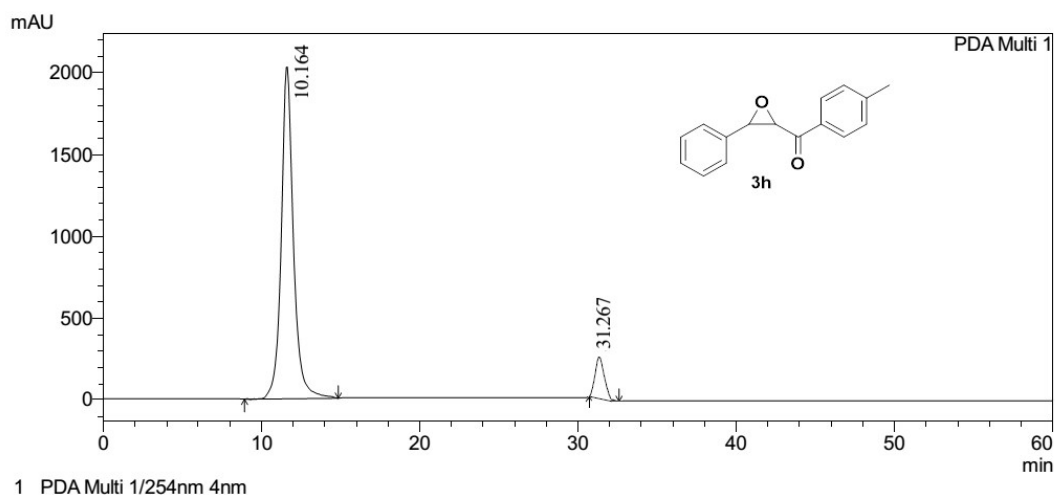

PeakTable

| PDA Ch1 254nm 4nm |           |          |        |         |          |
|-------------------|-----------|----------|--------|---------|----------|
| Peak#             | Ret. Time | Area     | Height | Area %  | Height % |
| 1                 | 10.164    | 36665482 | 376897 | 93.816  | 85.381   |
| 2                 | 31.267    | 2416824  | 64531  | 6.184   | 14.619   |
| Total             |           | 39082306 | 441428 | 100.000 | 100.000  |

**Figure S107:** HPLC chromatogram of (**3h**) in the presence 2 mol % of organocatalyst (**12a**) and TBHP/acetonitrile in room temperature condition.

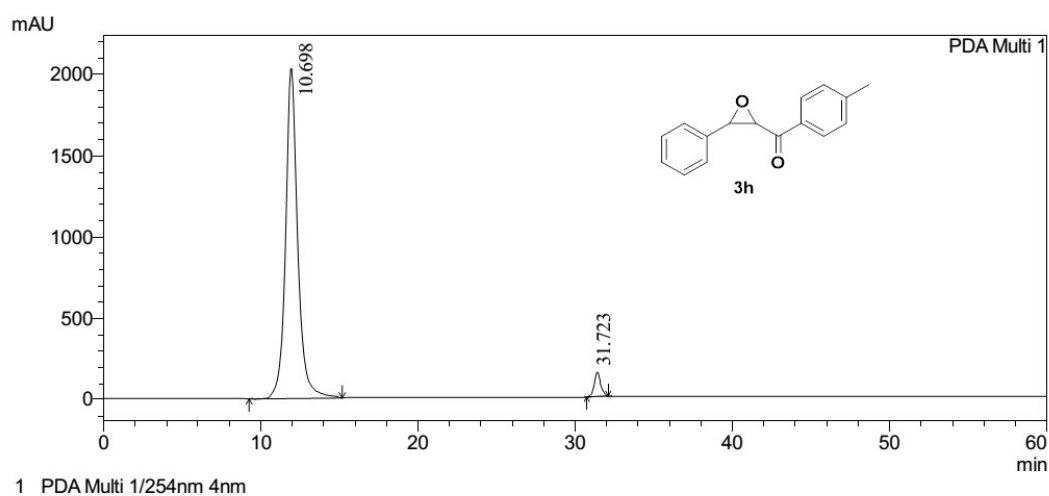

PeakTable

| PDA Ch1 254nm 4nm |           |          |         |         |          |
|-------------------|-----------|----------|---------|---------|----------|
| Peak#             | Ret. Time | Area     | Height  | Area %  | Height % |
| 1                 | 10.698    | 59989641 | 2024905 | 97.580  | 95.203   |
| 2                 | 31.723    | 1487822  | 102027  | 2.420   | 4.797    |
| Total             |           | 61477464 | 2126932 | 100.000 | 100.000  |

**Figure S108:** HPLC chromatogram of (**3h**) in the presence 2 mol % of organocatalyst (**12b**) and TBHP/acetonitrile in room temperature condition.

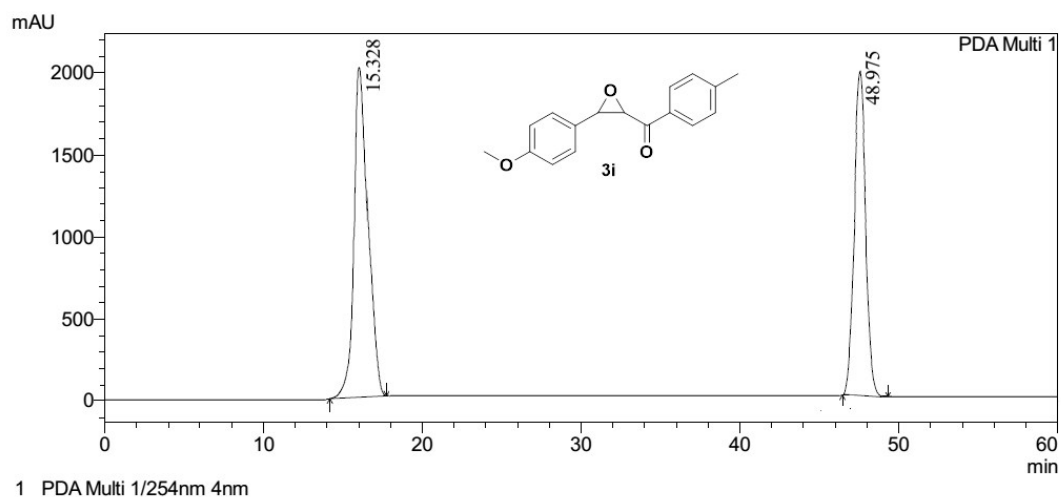

PeakTable

| Peak# | Ret. Time | Area    | Height | Area %  | Height % |
|-------|-----------|---------|--------|---------|----------|
| 1     | 15.328    | 4120354 | 196930 | 50.914  | 52.714   |
| 2     | 48.975    | 4011796 | 185535 | 49.086  | 47.286   |
| Total |           | 8132150 | 382465 | 100.000 | 100.000  |

**Figure S109:** HPLC chromatogram of **(3i)** Racemic mixture.

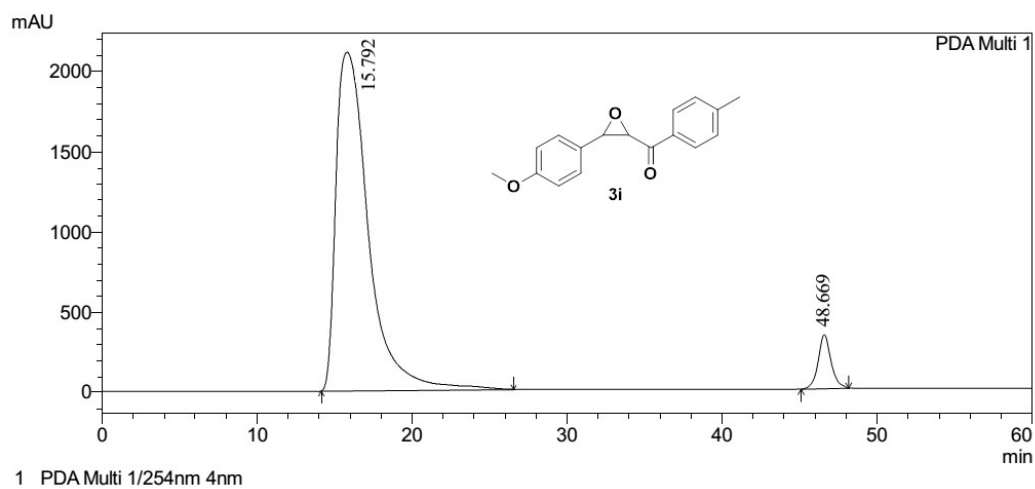

PeakTable

| Peak# | Ret. Time | Area     | Height  | Area %  | Height % |
|-------|-----------|----------|---------|---------|----------|
| 1     | 15.792    | 14690360 | 1273254 | 91.885  | 96.459   |
| 2     | 48.669    | 1297389  | 19932   | 8.115   | 3.541    |
| Total |           | 15987749 | 1293185 | 100.000 | 100.000  |

**Figure S110:** HPLC chromatogram of **(3i)** in the presence 2 mol % of organocatalyst **(12a)** and TBHP/acetonitrile in room temperature condition.

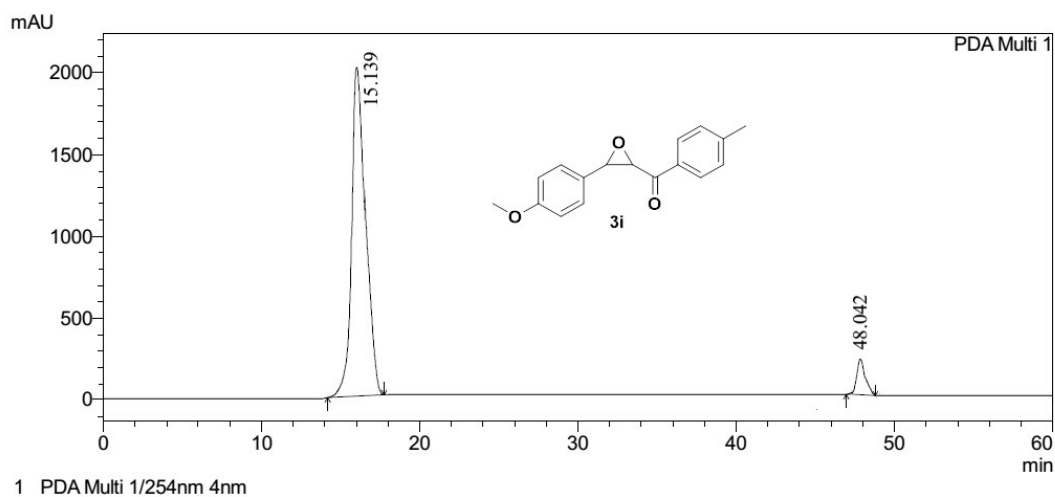

PeakTable

| Peak# | Ret. Time | Area     | Height  | Area %  | Height % |
|-------|-----------|----------|---------|---------|----------|
| 1     | 15.139    | 63163666 | 2142740 | 96.133  | 90.976   |
| 2     | 48.042    | 3936965  | 212532  | 4.867   | 9.024    |
| Total |           | 67100631 | 2355272 | 100.000 | 100.000  |

**Figure S111:** HPLC chromatogram of (**3i**) in the presence 2 mol % of organocatalyst (**12b**) and TBHP/acetonitrile in room temperature condition.

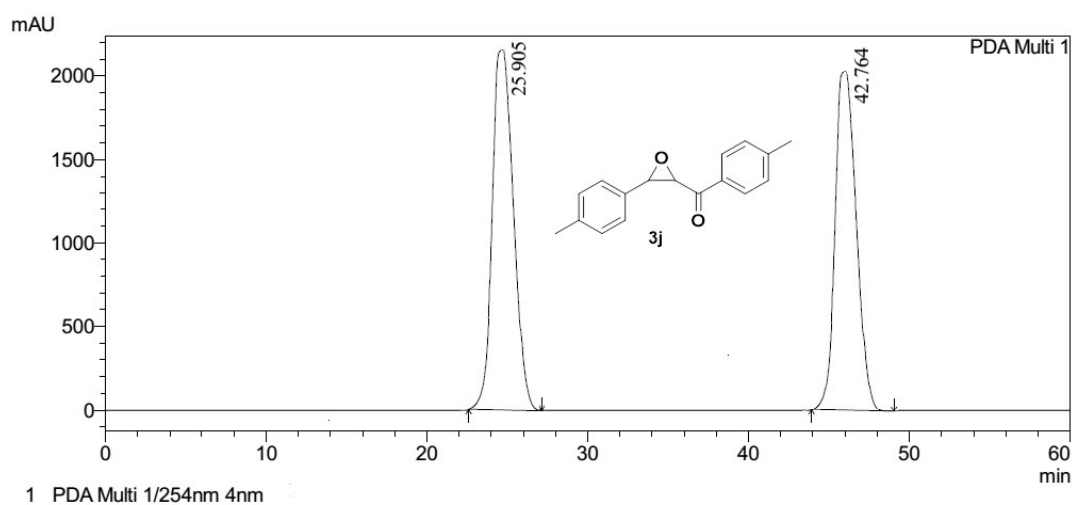

PeakTable

| Peak# | Ret. Time | Area    | Height | Area %  | Height % |
|-------|-----------|---------|--------|---------|----------|
| 1     | 25.905    | 3986453 | 97339  | 50.611  | 51.579   |
| 2     | 42.764    | 3859166 | 95403  | 49.389  | 48.421   |
| Total |           | 7845619 | 192742 | 100.000 | 100.000  |

**Figure S112:** HPLC chromatogram of (**3j**) Racemic mixture.

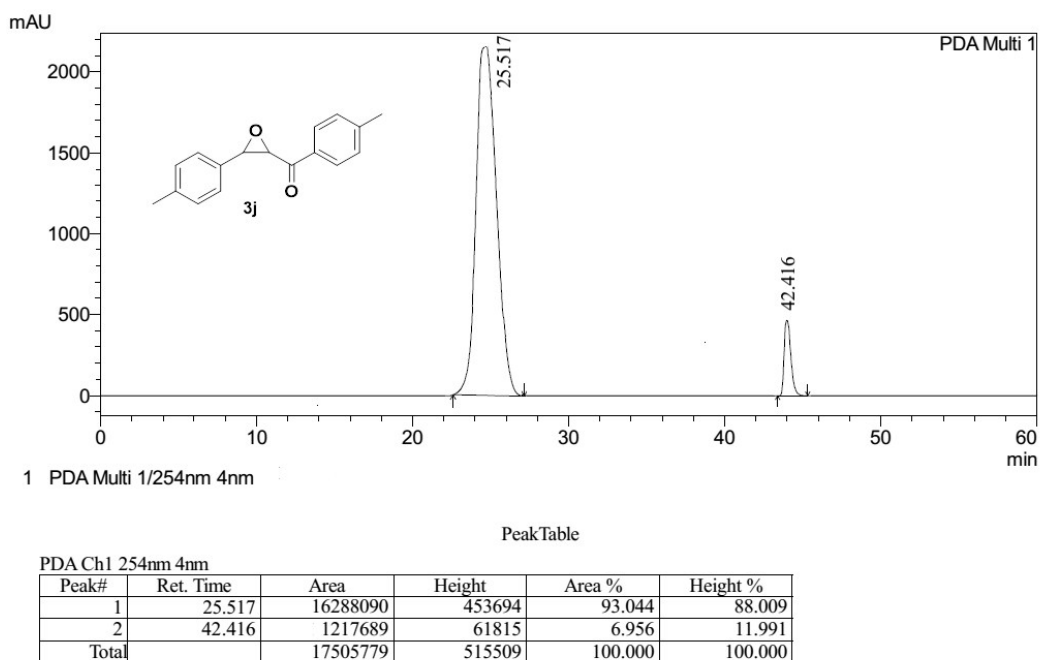

**Figure S113:** HPLC chromatogram of (3j) in the presence 2 mol % of organocatalyst (12a) and TBHP/acetonitrile in room temperature condition.

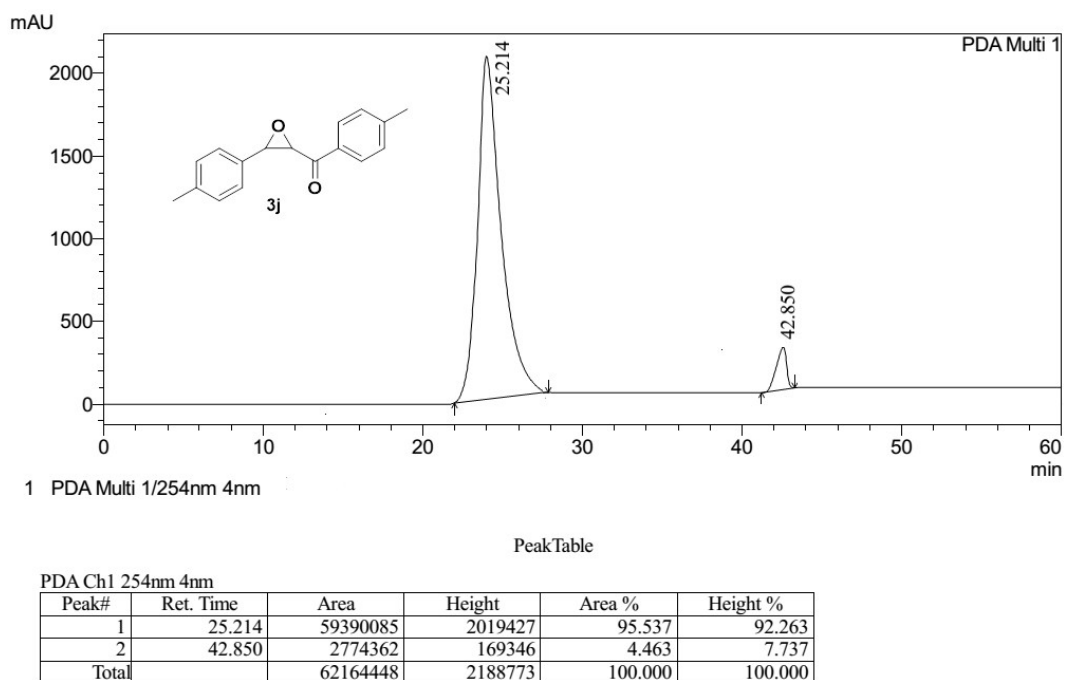

**Figure S114:** HPLC chromatogram of (3j) in the presence 2 mol % of organocatalyst (12b) and TBHP/acetonitrile in room temperature condition.

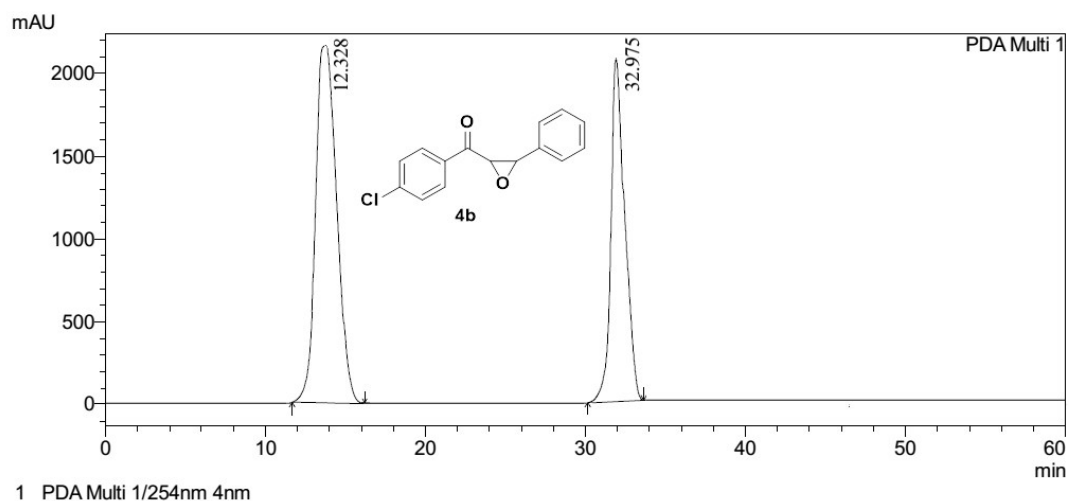

PeakTable

| Peak# | Ret. Time | Area    | Height | Area %  | Height % |
|-------|-----------|---------|--------|---------|----------|
| 1     | 12.328    | 4120354 | 196930 | 50.914  | 52.714   |
| 2     | 32.975    | 4011796 | 185535 | 49.086  | 47.286   |
| Total |           | 8132150 | 382465 | 100.000 | 100.000  |

**Figure S115:** HPLC chromatogram of **(4b)** Racemic mixture.

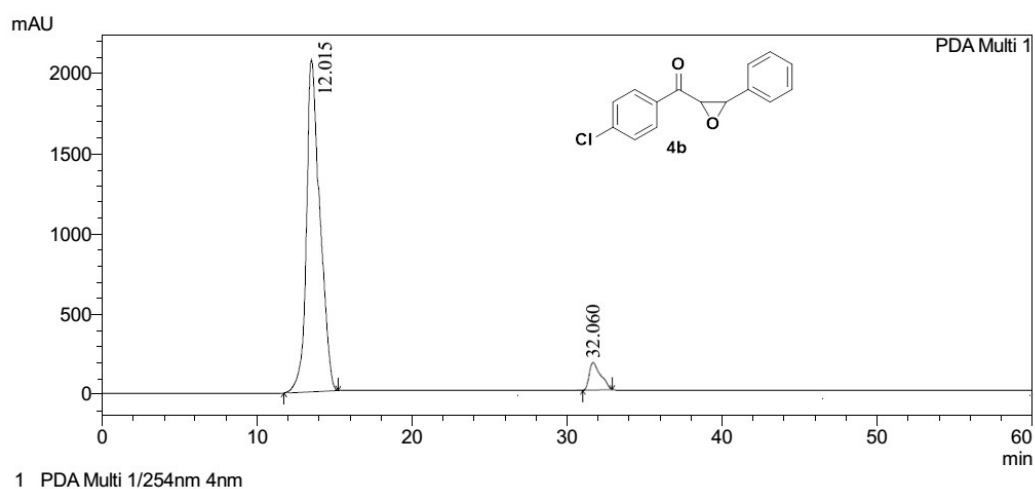

PeakTable

| Peak# | Ret. Time | Area     | Height | Area %  | Height % |
|-------|-----------|----------|--------|---------|----------|
| 1     | 12.015    | 61357098 | 746211 | 96.057  | 93.606   |
| 2     | 32.060    | 61860393 | 50970  | 3.943   | 6.394    |
| Total |           | 63217491 | 797180 | 100.000 | 100.000  |

**Figure S116:** HPLC chromatogram of **(4b)** in the presence 2 mol % of organocatalyst **(12a)** and TBHP/acetonitrile in room temperature condition.

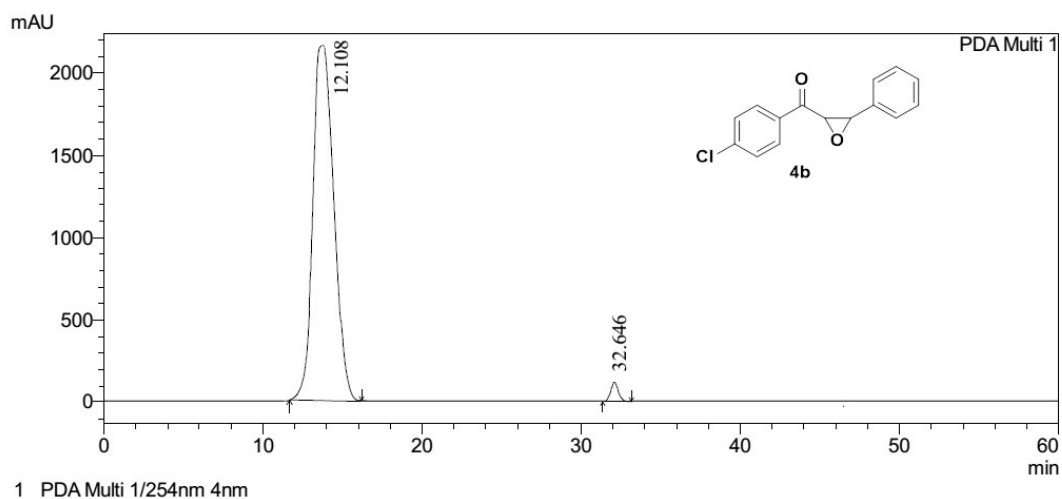

PeakTable

PDA Ch1 254nm 4nm

| Peak# | Ret. Time | Area     | Height  | Area %  | Height % |
|-------|-----------|----------|---------|---------|----------|
| 1     | 12.108    | 68931819 | 2182365 | 98.584  | 98.087   |
| 2     | 32.646    | 989860   | 42564   | 1.416   | 1.913    |
| Total |           | 69921680 | 2224929 | 100.000 | 100.000  |

**Figure S117:** HPLC chromatogram of (**4b**) in the presence 2 mol % of organocatalyst (**12b**) and TBHP/acetonitrile in room temperature condition.

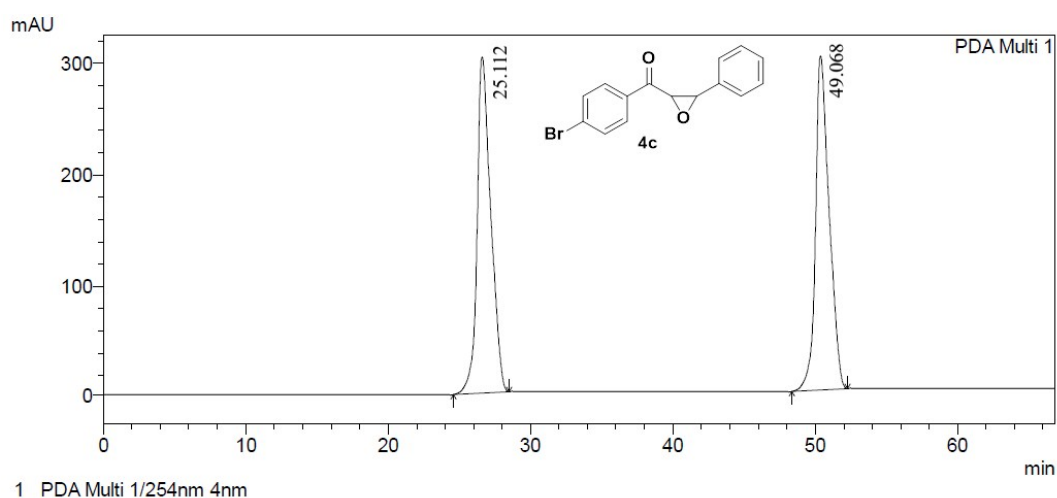

PeakTable

PDA Ch1 254nm 4nm

| Peak# | Ret. Time | Area     | Height | Area %  | Height % |
|-------|-----------|----------|--------|---------|----------|
| 1     | 25.112    | 9236738  | 103209 | 50.607  | 51.001   |
| 2     | 49.068    | 9187611  | 102591 | 49.393  | 48.999   |
| Total |           | 18424349 | 205800 | 100.000 | 100.000  |

**Figure S118:** HPLC chromatogram of (**4c**) Racemic mixture.

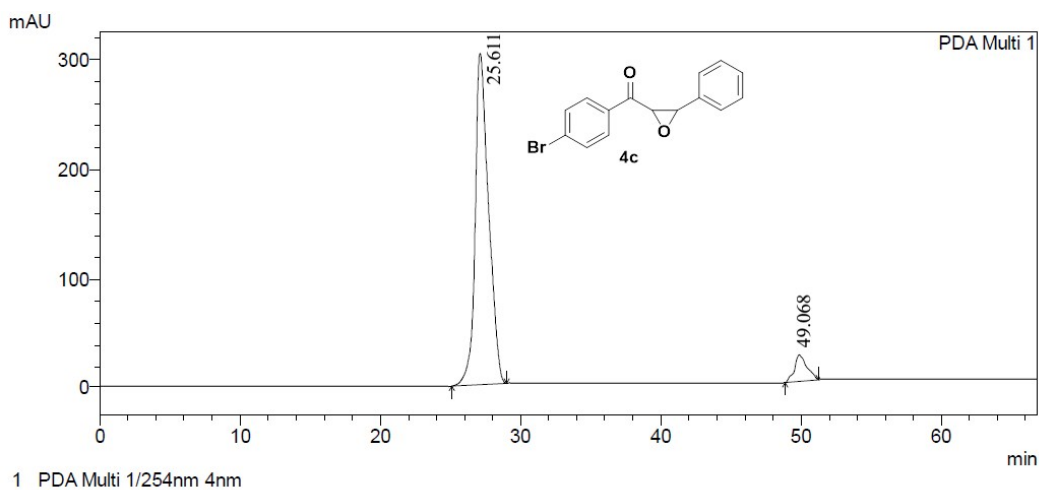

**Figure S119:** HPLC chromatogram of (**4c**) in the presence 2 mol % of organocatalyst (**12a**) and TBHP/acetonitrile in room temperature condition.

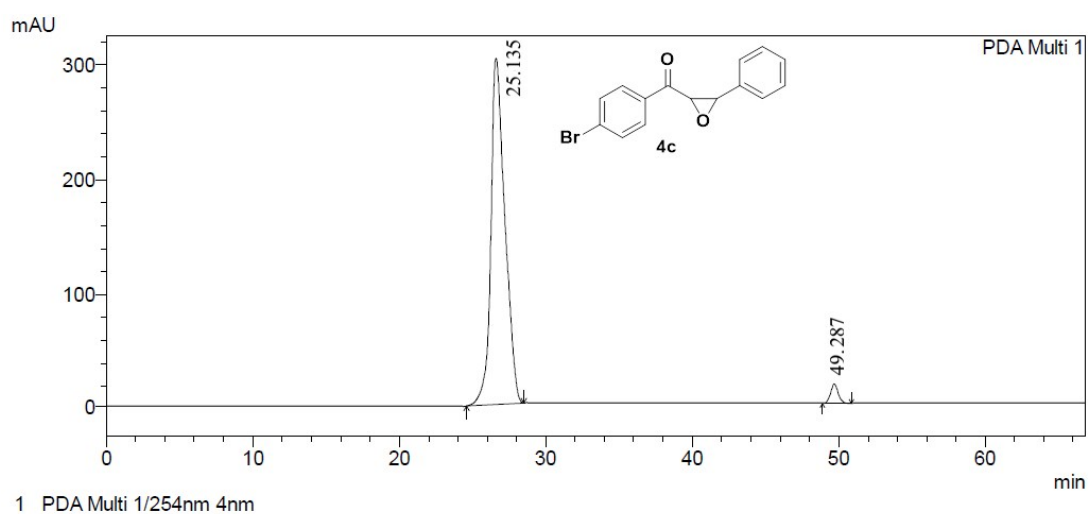

**Figure S120:** HPLC chromatogram of (**4c**) in the presence 2 mol % of organocatalyst (**12b**) and TBHP/acetonitrile in room temperature condition.

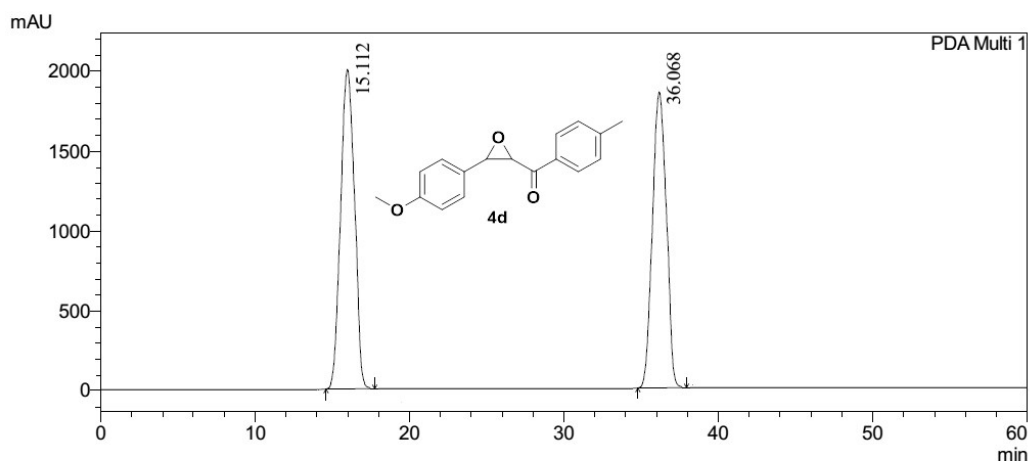

PeakTable

| Peak# | Ret. Time | Area     | Height | Area %  | Height % |
|-------|-----------|----------|--------|---------|----------|
| 1     | 15.112    | 9151863  | 102571 | 50.394  | 51.420   |
| 2     | 36.068    | 9065393  | 95256  | 49.606  | 48.580   |
| Total |           | 18217256 | 197826 | 100.000 | 100.000  |

**Figure S121:** HPLC chromatogram of **(4d)** Racemic mixture.

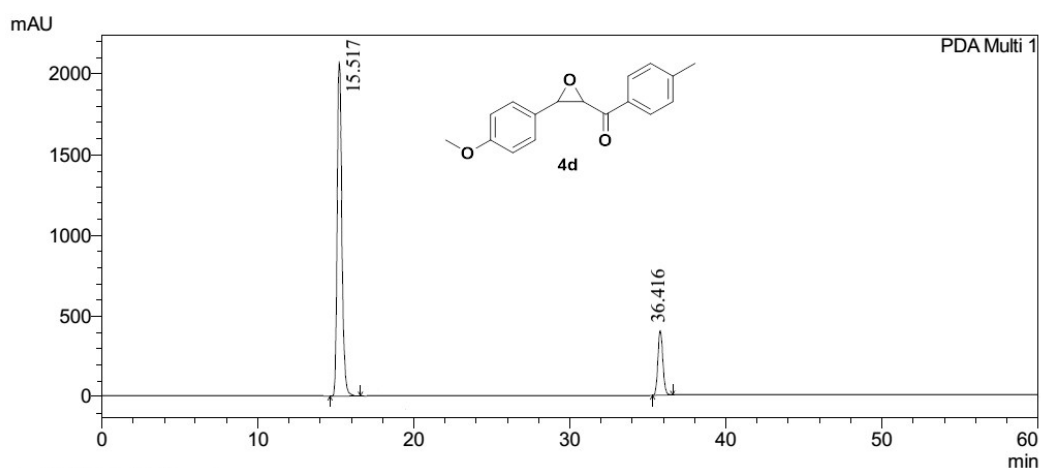

PeakTable

| Peak# | Ret. Time | Area     | Height | Area %  | Height % |
|-------|-----------|----------|--------|---------|----------|
| 1     | 15.517    | 16288090 | 453694 | 93.044  | 88.009   |
| 2     | 36.416    | 1217689  | 61815  | 6.956   | 11.991   |
| Total |           | 17505779 | 515509 | 100.000 | 100.000  |

**Figure S122:** HPLC chromatogram of **(4d)** in the presence 2 mol % of organocatalyst **(12a)** and TBHP/acetonitrile in room temperature condition.

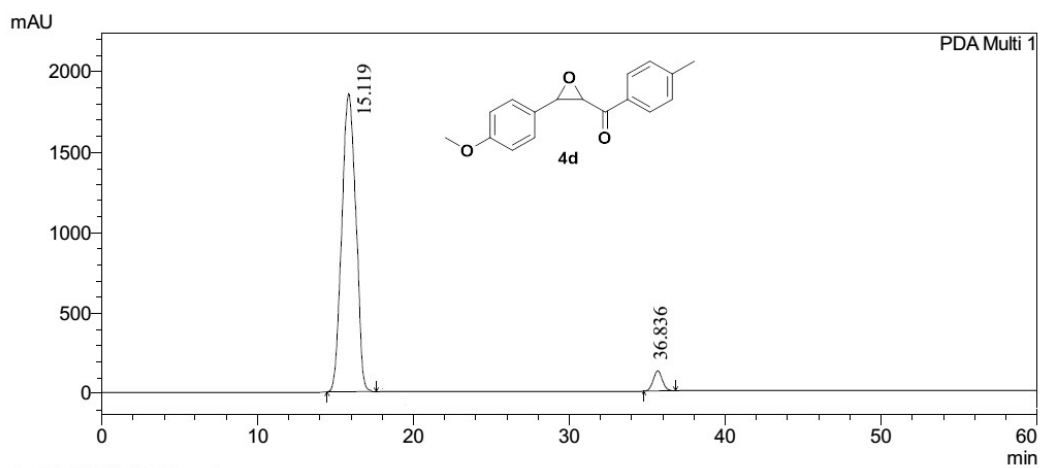

PeakTable

| Peak# | Ret. Time | Area    | Height | Area %  | Height % |
|-------|-----------|---------|--------|---------|----------|
| 1     | 15.119    | 1973568 | 8839   | 96.216  | 88.640   |
| 2     | 36.836    | 77623   | 1133   | 3.784   | 11.360   |
| Total |           | 2051191 | 9971   | 100.000 | 100.000  |

**Figure S123:** HPLC chromatogram of (**4d**) in the presence 2 mol % of organocatalyst (**12b**) and TBHP/acetonitrile in room temperature condition.

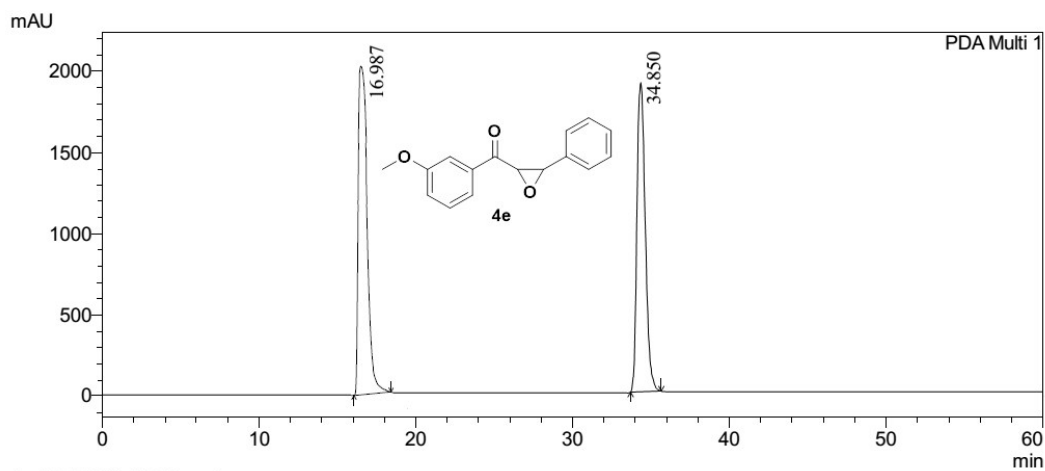

PeakTable

| Peak# | Ret. Time | Area     | Height | Area %  | Height % |
|-------|-----------|----------|--------|---------|----------|
| 1     | 16.987    | 5653681  | 104342 | 50.162  | 51.369   |
| 2     | 34.850    | 5517457  | 97410  | 49.838  | 48.631   |
| Total |           | 11171138 | 201752 | 100.000 | 100.000  |

**Figure S124:** HPLC chromatogram of (**4e**) Racemic mixture.

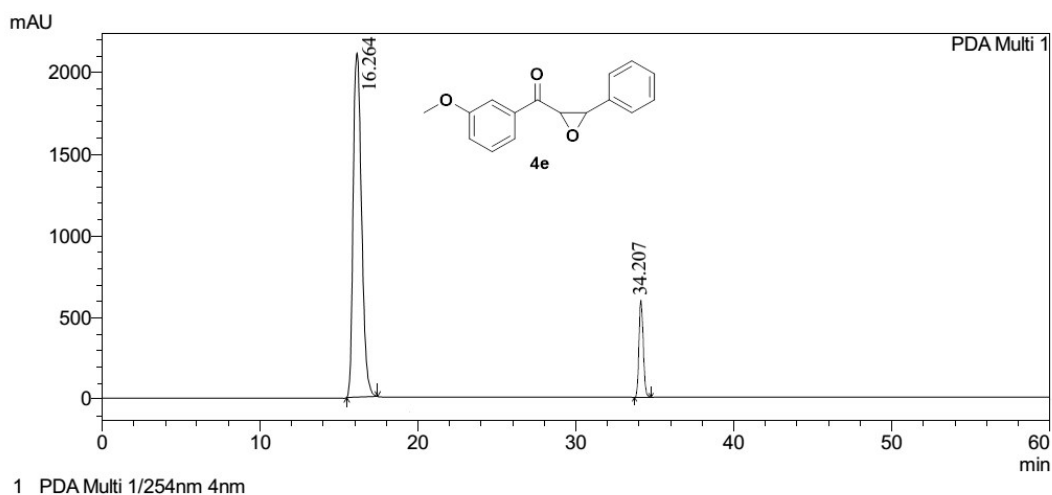

| PeakTable         |           |          |        |         |          |
|-------------------|-----------|----------|--------|---------|----------|
| PDA Ch1 254nm 4nm |           |          |        |         |          |
| Peak#             | Ret. Time | Area     | Height | Area %  | Height % |
| 1                 | 16.264    | 8473498  | 108659 | 83.721  | 74.717   |
| 2                 | 34.207    | 1647576  | 36770  | 16.279  | 25.283   |
| Total             |           | 10121074 | 145429 | 100.000 | 100.000  |

**Figure S125:** HPLC chromatogram of (**4e**) in the presence 2 mol % of organocatalyst (**12a**) and TBHP/acetonitrile in room temperature condition.

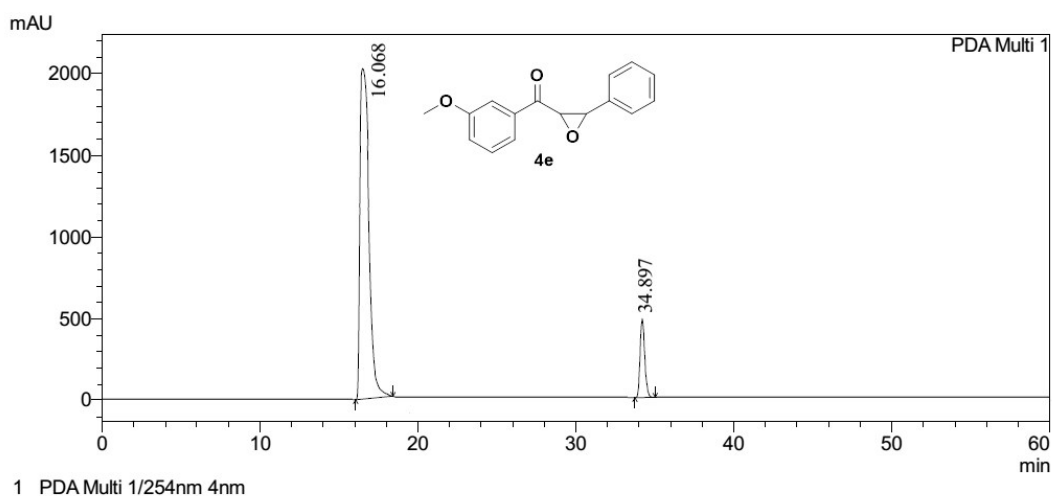

| PeakTable         |           |          |         |         |          |
|-------------------|-----------|----------|---------|---------|----------|
| PDA Ch1 254nm 4nm |           |          |         |         |          |
| Peak#             | Ret. Time | Area     | Height  | Area %  | Height % |
| 1                 | 16.068    | 62187860 | 2088838 | 87.957  | 84.178   |
| 2                 | 34.897    | 6943057  | 392620  | 12.043  | 15.822   |
| Total             |           | 69130916 | 2481458 | 100.000 | 100.000  |

**Figure S126:** HPLC chromatogram of (**4e**) in the presence 2 mol % of organocatalyst (**12b**) and TBHP/acetonitrile in room temperature condition.

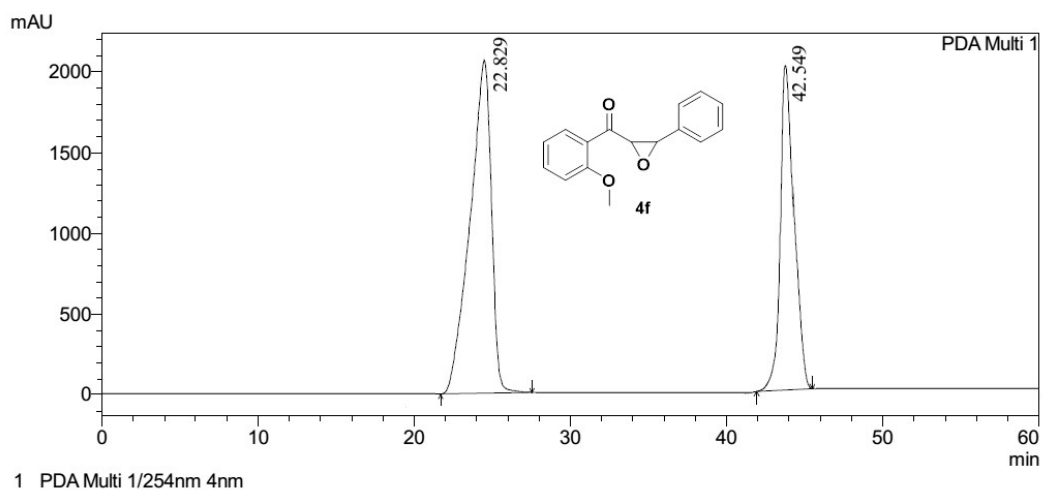

PeakTable

| Peak# | Ret. Time | Area    | Height | Area %  | Height % |
|-------|-----------|---------|--------|---------|----------|
| 1     | 22.829    | 1973568 | 8839   | 50.216  | 51.640   |
| 2     | 42.549    | 1877623 | 8433   | 49.784  | 48.360   |
| Total |           | 3851191 | 17272  | 100.000 | 100.000  |

**Figure S127:** HPLC chromatogram of (4f) Racemic mixture.

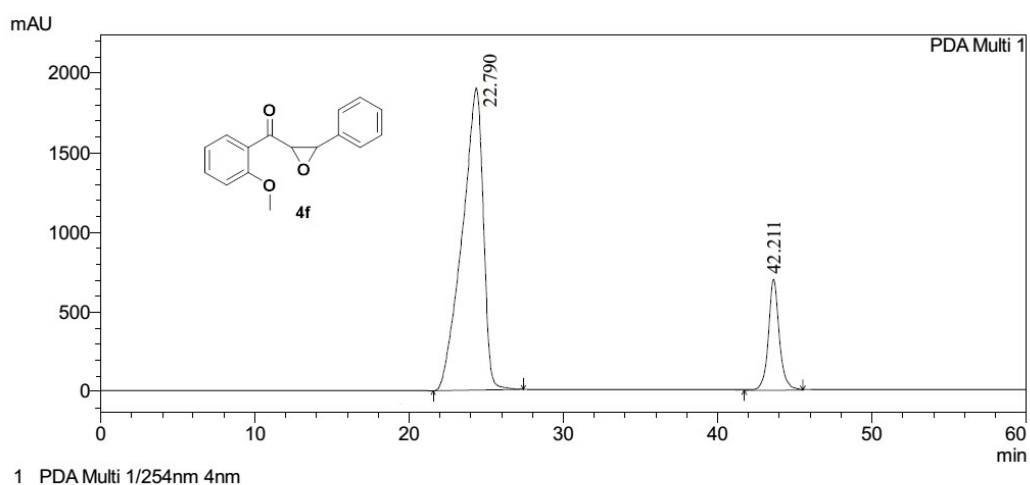

PeakTable

| Peak# | Ret. Time | Area      | Height  | Area %  | Height % |
|-------|-----------|-----------|---------|---------|----------|
| 1     | 22.790    | 94686876  | 1249027 | 80.058  | 89.034   |
| 2     | 42.211    | 23585725  | 153840  | 19.942  | 10.966   |
| Total |           | 118272601 | 1402868 | 100.000 | 100.000  |

**Figure S128:** HPLC chromatogram of (4f) in the presence 2 mol % of organocatalyst (12a) and TBHP/acetonitrile in room temperature condition.

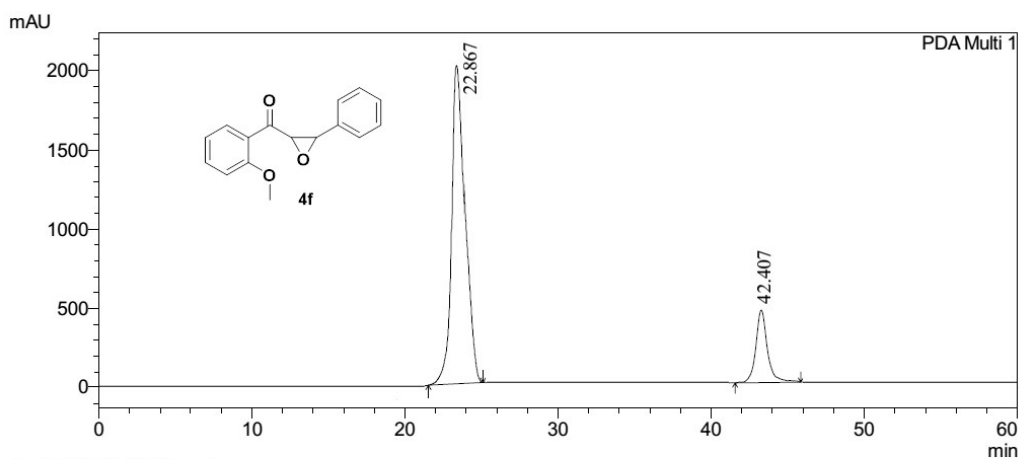

PDA Ch1 254nm 4nm

PeakTable

| Peak# | Ret. Time | Area     | Height | Area %  | Height % |
|-------|-----------|----------|--------|---------|----------|
| 1     | 22.867    | 24206970 | 377437 | 86.330  | 93.313   |
| 2     | 42.407    | 3833205  | 27046  | 13.670  | 6.687    |
| Total |           | 28040175 | 404483 | 100.000 | 100.000  |

**Figure S129:** HPLC chromatogram of (**4f**) in the presence 2 mol % of organocatalyst (**12b**) and TBHP/acetonitrile in room temperature condition.

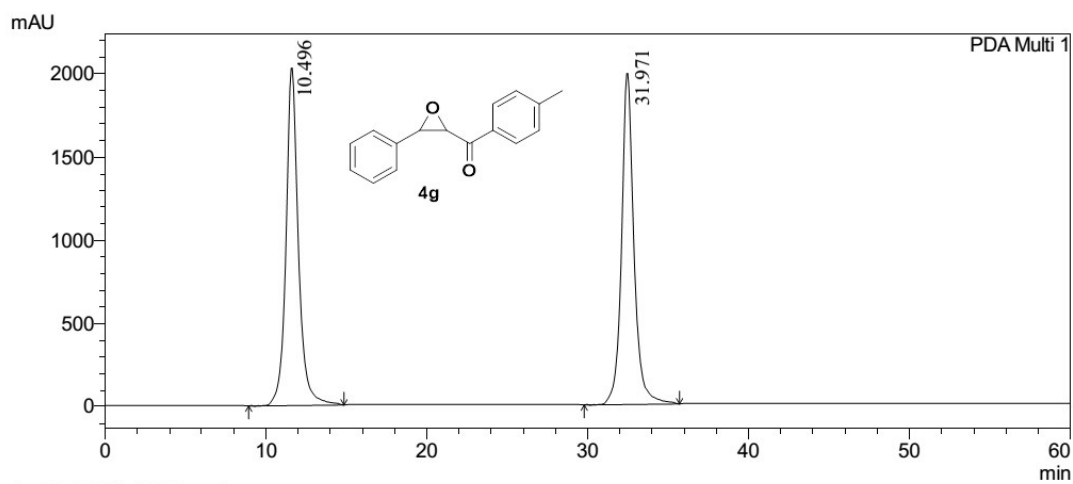

PDA Ch1 254nm 4nm

PeakTable

| Peak# | Ret. Time | Area     | Height | Area %  | Height % |
|-------|-----------|----------|--------|---------|----------|
| 1     | 10.496    | 20622334 | 254758 | 50.214  | 51.370   |
| 2     | 31.971    | 19741162 | 230817 | 49.786  | 48.630   |
| Total |           | 40363496 | 485575 | 100.000 | 100.000  |

**Figure S130:** HPLC chromatogram of (**4g**) Racemic mixture.

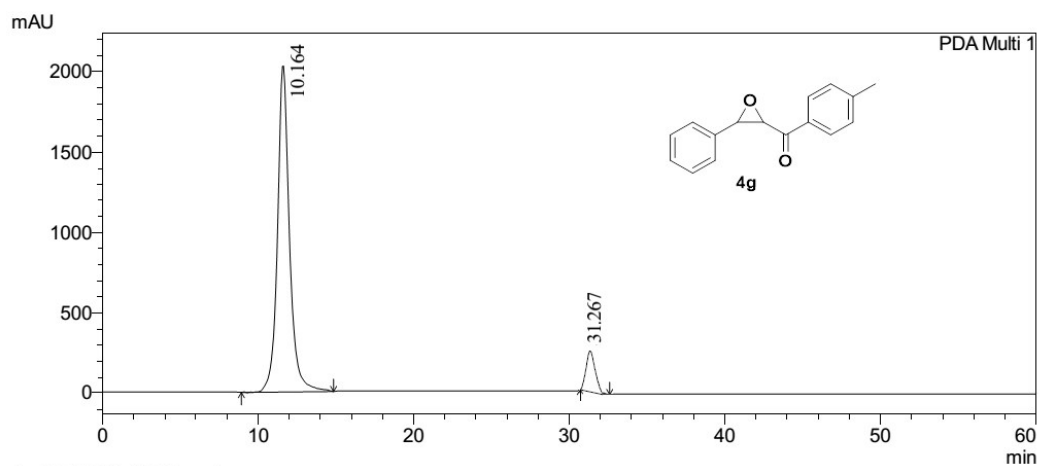

PeakTable

| Peak# | Ret. Time | Area     | Height | Area %  | Height % |
|-------|-----------|----------|--------|---------|----------|
| 1     | 10.164    | 36665482 | 376897 | 93.816  | 85.381   |
| 2     | 31.267    | 2416824  | 64531  | 6.184   | 14.619   |
| Total |           | 39082306 | 441428 | 100.000 | 100.000  |

**Figure S131:** HPLC chromatogram of (**4g**) in the presence 2 mol % of organocatalyst (**12a**) and TBHP/acetonitrile in room temperature condition.

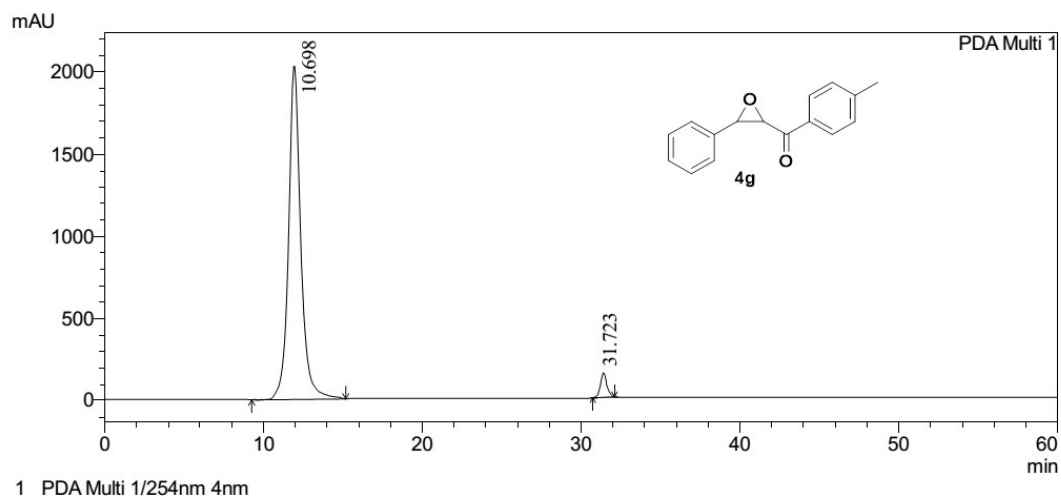

PeakTable

| Peak# | Ret. Time | Area     | Height  | Area %  | Height % |
|-------|-----------|----------|---------|---------|----------|
| 1     | 10.698    | 59989641 | 2024905 | 97.580  | 95.203   |
| 2     | 31.723    | 1487822  | 102027  | 2.420   | 4.797    |
| Total |           | 61477464 | 2126932 | 100.000 | 100.000  |

**Figure S132:** HPLC chromatogram of (**4g**) in the presence 2 mol % of organocatalyst (**12b**) and TBHP/acetonitrile in room temperature condition.

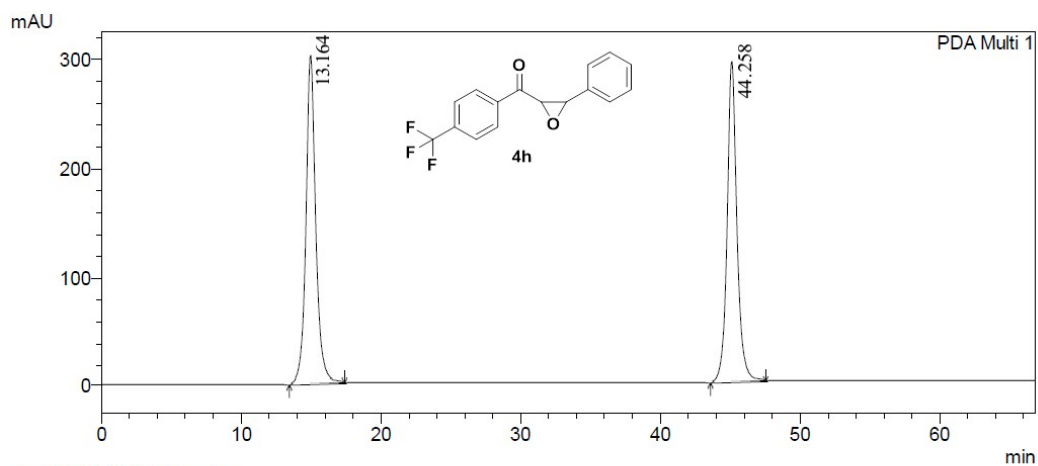

PeakTable

| Peak# | Ret. Time | Area     | Height | Area %  | Height % |
|-------|-----------|----------|--------|---------|----------|
| 1     | 13.164    | 36525852 | 399404 | 50.753  | 51.826   |
| 2     | 44.258    | 35721829 | 371448 | 49.247  | 48.174   |
| Total |           | 72247681 | 770851 | 100.000 | 100.000  |

**Figure S133:** HPLC chromatogram of **(4h)** Racemic mixture.

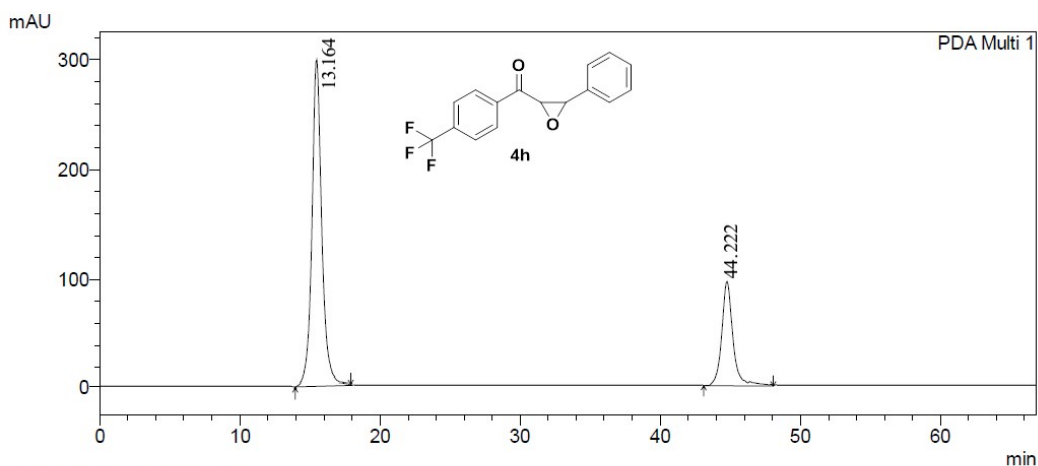

PeakTable

| Peak# | Ret. Time | Area     | Height | Area %  | Height % |
|-------|-----------|----------|--------|---------|----------|
| 1     | 13.164    | 36525852 | 399404 | 90.753  | 84.826   |
| 2     | 44.222    | 3721829  | 71448  | 9.247   | 15.174   |
| Total |           | 40247681 | 470851 | 100.000 | 100.000  |

**Figure S134:** HPLC chromatogram of **(4h)** in the presence 2 mol % of organocatalyst **(12a)** and TBHP/acetonitrile in room temperature condition.

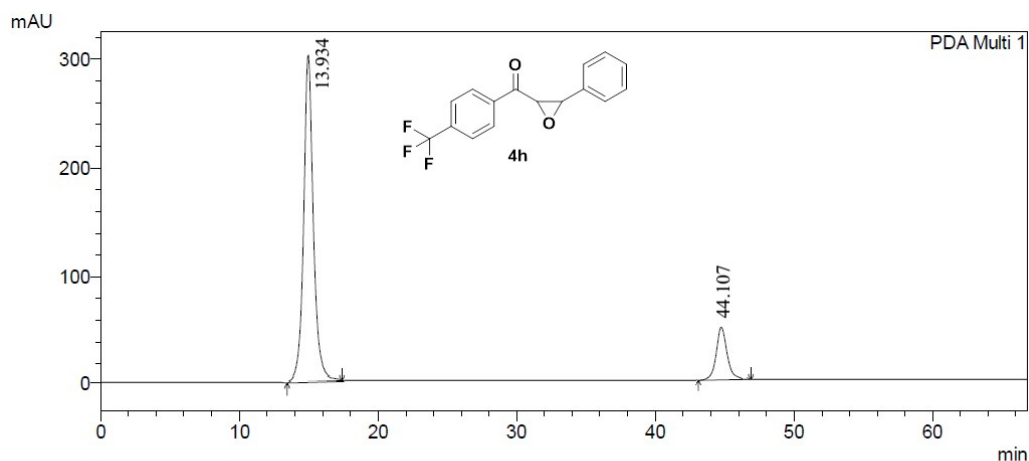

PeakTable

| Peak# | Ret. Time | Area    | Height | Area %  | Height % |
|-------|-----------|---------|--------|---------|----------|
| 1     | 13.934    | 3904352 | 75789  | 96.378  | 95.441   |
| 2     | 44.107    | 146742  | 3620   | 3.622   | 4.559    |
| Total |           | 4051094 | 79409  | 100.000 | 100.000  |

**Figure S135:** HPLC chromatogram of (**4h**) in the presence 2 mol % of organocatalyst (**12b**) and TBHP/acetonitrile in room temperature condition.

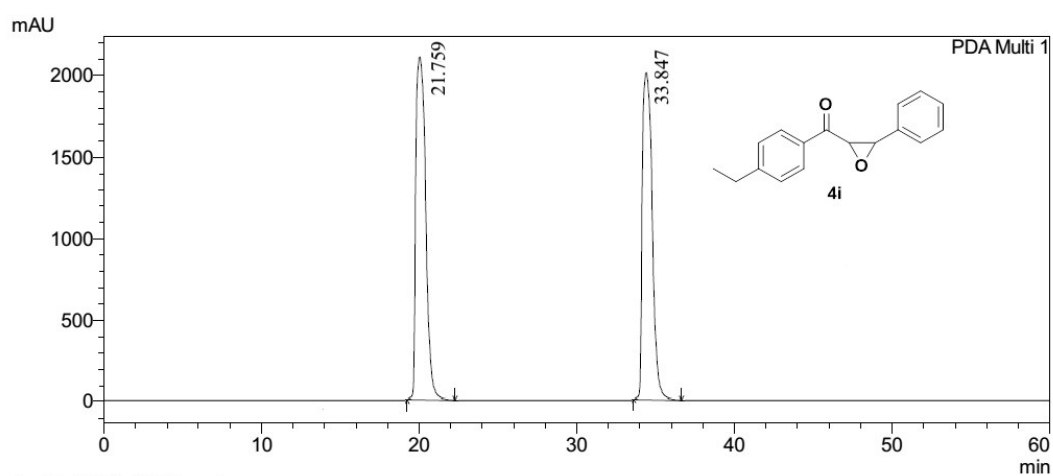

PeakTable

| Peak# | Ret. Time | Area    | Height | Area %  | Height % |
|-------|-----------|---------|--------|---------|----------|
| 1     | 21.759    | 1362622 | 9131   | 50.357  | 51.296   |
| 2     | 33.847    | 1222762 | 8981   | 49.643  | 48.704   |
| Total |           | 2585384 | 18112  | 100.000 | 100.000  |

**Figure S136:** HPLC chromatogram of (**4i**) Racemic mixture.

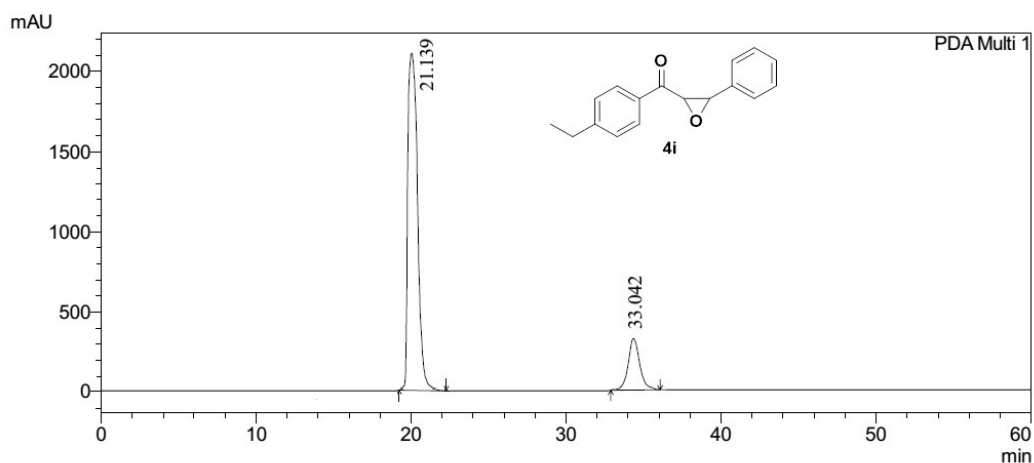

PeakTable

| Peak# | Ret. Time | Area     | Height  | Area %  | Height % |
|-------|-----------|----------|---------|---------|----------|
| 1     | 21.139    | 63163666 | 2142740 | 94.133  | 90.976   |
| 2     | 33.042    | 3936965  | 212532  | 5.867   | 9.024    |
| Total |           | 67100631 | 2355272 | 100.000 | 100.000  |

**Figure S137:** HPLC chromatogram of (**4i**) in the presence 2 mol % of organocatalyst (**12a**) and TBHP/acetonitrile in room temperature condition.

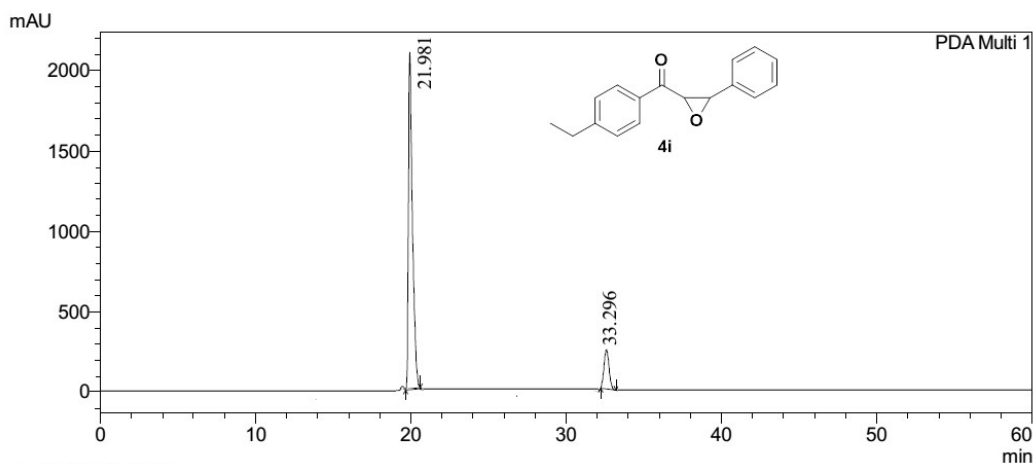

PeakTable

| Peak# | Ret. Time | Area     | Height | Area %  | Height % |
|-------|-----------|----------|--------|---------|----------|
| 1     | 21.981    | 27835219 | 399135 | 98.489  | 94.977   |
| 2     | 33.296    | 427069   | 21110  | 1.511   | 5.023    |
| Total |           | 28262287 | 420246 | 100.000 | 100.000  |

**Figure S138:** HPLC chromatogram of (**4i**) in the presence 2 mol % of organocatalyst (**12b**) and TBHP/acetonitrile in room temperature condition.

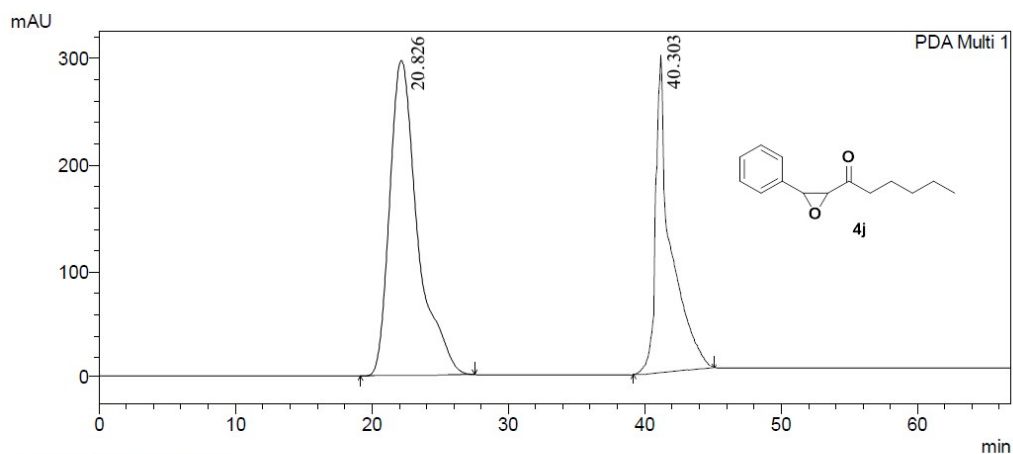

PeakTable

| Peak# | Ret. Time | Area     | Height | Area %  | Height % |
|-------|-----------|----------|--------|---------|----------|
| 1     | 20.826    | 6412071  | 85516  | 50.674  | 51.910   |
| 2     | 40.303    | 6338383  | 83187  | 49.326  | 48.090   |
| Total |           | 12750455 | 168703 | 100.000 | 100.000  |

**Figure S139:** HPLC chromatogram of **(4i)** Racemic mixture.

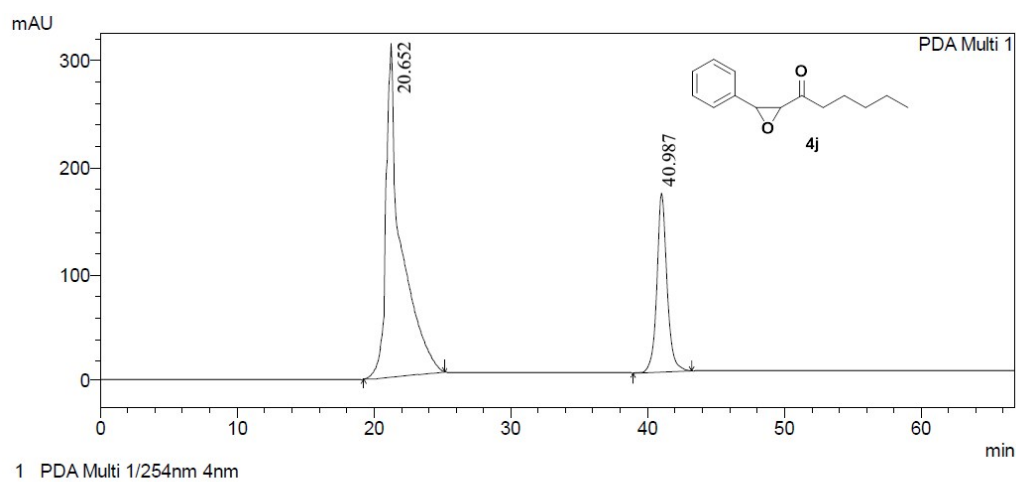

PeakTable

| Peak# | Ret. Time | Area    | Height | Area %  | Height % |
|-------|-----------|---------|--------|---------|----------|
| 1     | 20.652    | 1677846 | 72754  | 82.584  | 80.046   |
| 2     | 40.987    | 353831  | 8042   | 17.416  | 19.954   |
| Total |           | 2031677 | 80797  | 100.000 | 100.000  |

**Figure S140:** HPLC chromatogram of **(4j)** in the presence 2 mol % of organocatalyst **(12a)** and TBHP/acetonitrile in room temperature condition.

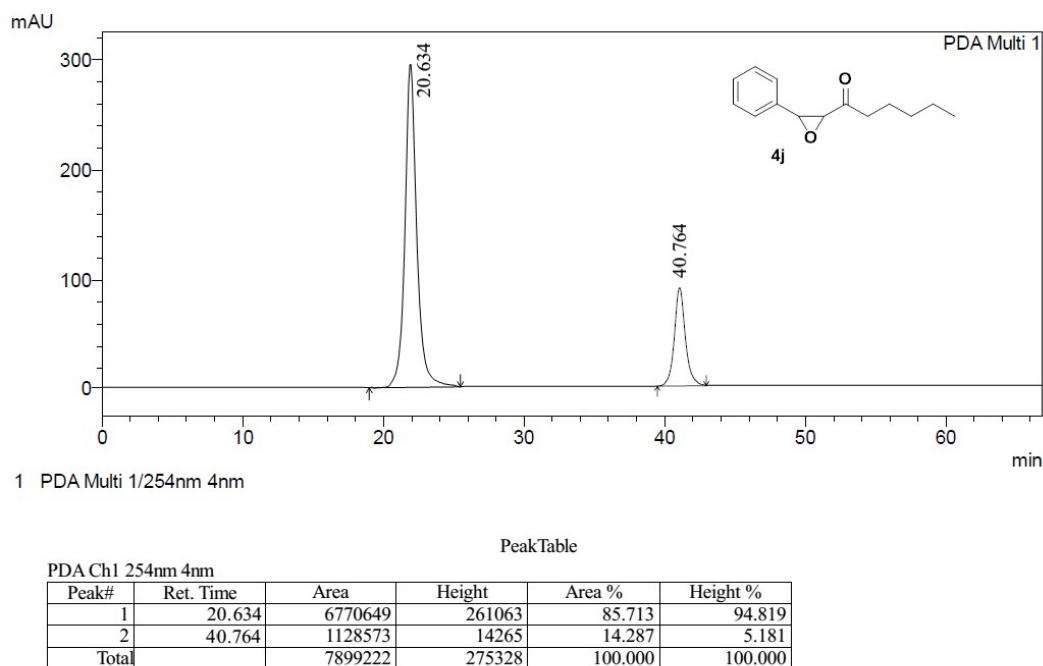

**Figure S141:** HPLC chromatogram of (**4j**) in the presence 2 mol % of organocatalyst (**12b**) and TBHP/acetonitrile in room temperature condition.

## References

- (a) Y. Chu, X. Liu, W. Li, X. Hu, L. Lin, X. Feng, *Chem. Sci.*, 2012, **3**, 1996; (b) V. Ashokkumar, R. Balasaravanan, V. Sadhasivam, S. M. Jenofar, A. Siva, *J. Mol. Catal. A.: Chem.*, 2015, **409**, 127; (c) J. Sivamani, V. Ashokkumar, V. Sadhasivam, K. Duraimurugan, A. Siva, *RSC Adv.*, 2014, **4**, 60293.
- (a) T. Hashimoto, K. Maruoka, *Chem. Rev.*, 2007, **107**, 5656. (b) G. D. Faveri, G. Ilyashenko, M. Watkinson, *Chem. Soc. Rev.*, 2011, **40**, 1722.
- (a) X. Wang, L. Yin, T. Yang, Y. Wang, *Tetrahedron Asymmetry*, 2007, **18**, 108; (b) K. Hori, M. Tamura, K. Tani, N. Nishiwaki, M. Ariga, Y. Tohda, *Tetrahedron Lett.*, 2006, **47**, 3115.
- (a) Y. Liu, B. A. Provencher, B. J. Bartelson, L. Deng, *Chem. Sci.*, 2011, **2**, 1301; (b) O. Cusso, I. G. Bosch, X. Ribas, J. L. Fillol, M. Costas, *J. Am. Chem. Soc.*, 2013, **135**, 14871.
- (a) J. Lv, X. Wang, J. Liu, L. Zhang, Y. Wang, *Tetrahedron Asymmetry*, 2006, **17**, 330; (b) B. Makoa, Z. Rapia, G. Keglevicha, A. Szollosy, L. Drahosc, L. Hegedusd, P. Bakoa, *Tetrahedron Asymmetry*, 2010, **21**, 919.
- (a) Wang, W. L. Shi, M. Li, K. Ding, *Angew. Chem., Int. Ed.*, 2005, **44**, 6362; (b) B. Wang, S. Wang, C. Xia, W. Sun, *Chem. Eur. J.*, 2012, **18**, 7332; (c) C. Zeng, D. Yuan, B. Zhao, Y. Yao, *Org. Lett.*, 2015, **17**, 2242.
- (a) X. Liu, Y. Li, G. Wang, Z. Chai, Y. Wua, G. Zhaoa, *Tetrahedron Asymmetry*, 2006, **17**, 750; (b) J. Lu, Y. H. Xu, F. Liu, T. P. Loh, *Tetrahedron Lett.*, 2008, **49**, 6007.
